# Supplementary material for: Discovery of Novel Diphenyl Acrylonitrile Derivatives That Promote Adult Rats’ Hippocampal Neurogenesis
Source: MDPI journal article supplement (doi:10.3390/ijms25021241), 2024-01-19
Supplement: s1 [file s1]

Supplementary materials for

# Discovery of Novel diphenyl acrylonitrile derivatives that Promote Adult Rats' Hippocampal Neurogenesis

Si-Si Liu <sup>1, #</sup>, Cong-Xuan Ma <sup>1, #</sup>, Zheng-Yang Quan <sup>2</sup>,  
Jing Ding <sup>1</sup>, Liang Yang <sup>2</sup>, Si-Meng Liu <sup>1</sup>, He-Ao Zhang <sup>2</sup>, Hong Qing <sup>\*, 2</sup>, Jian-Hua Liang <sup>\*, 1</sup>

1 Key Laboratory of Medical Molecule Science and Pharmaceutical  
Engineering, School of Chemistry and Chemical Engineering,  
Beijing Institute of Technology, Beijing 102488, China

2 School of Life Science, Beijing Institute of Technology, Beijing,  
100081, China

# Contributed equally to this paper.

\* Correspondence: hqing@bit.edu.cn(H.Q.); ljhbit@bit.edu.cn(J.-H.L.)

## Contents

1. Table S1. NMR spectra checklist for the target compounds.
2. <sup>1</sup>H and <sup>13</sup>C NMR Spectra for the representative compounds.
3. HRMS for the representative compounds.
4. Pharmacokinetic experimental conditions of compound **32b**.
5. Figure S1. Results of dose-toxicity experiment for compounds **29b**, **32a**, and **32b**.

**Table S1.** NMR spectra checklist for the target compounds.

| Compounds  | <sup>1</sup> H NMR | <sup>13</sup> C NMR | HRMS |
|------------|--------------------|---------------------|------|
| <b>8c</b>  | √                  | √                   | √    |
| <b>8d</b>  | √                  | √                   | √    |
| <b>8e</b>  | √                  | √                   | √    |
| <b>8g</b>  | √                  | √                   | √    |
| <b>8h</b>  | √                  | √                   | √    |
| <b>8j</b>  | √                  | √                   | √    |
| <b>8k</b>  | √                  | √                   | √    |
| <b>8l</b>  | √                  | √                   | √    |
| <b>9b</b>  | √                  | √                   | √    |
| <b>12f</b> | √                  | √                   | √    |
| <b>18b</b> | √                  | √                   | √    |
| <b>23b</b> | √                  | √                   | √    |
| <b>23i</b> | √                  | √                   | √    |
| <b>24b</b> | √                  | √                   | √    |
| <b>29a</b> | √                  | √                   | √    |
| <b>29b</b> | √                  | √                   | √    |
| <b>32a</b> | √                  | √                   | √    |
| <b>32b</b> | √                  | √                   | √    |
| <b>36a</b> | √                  | √                   | √    |
| <b>39b</b> | √                  | √                   | √    |
| <b>42b</b> | √                  | √                   | √    |

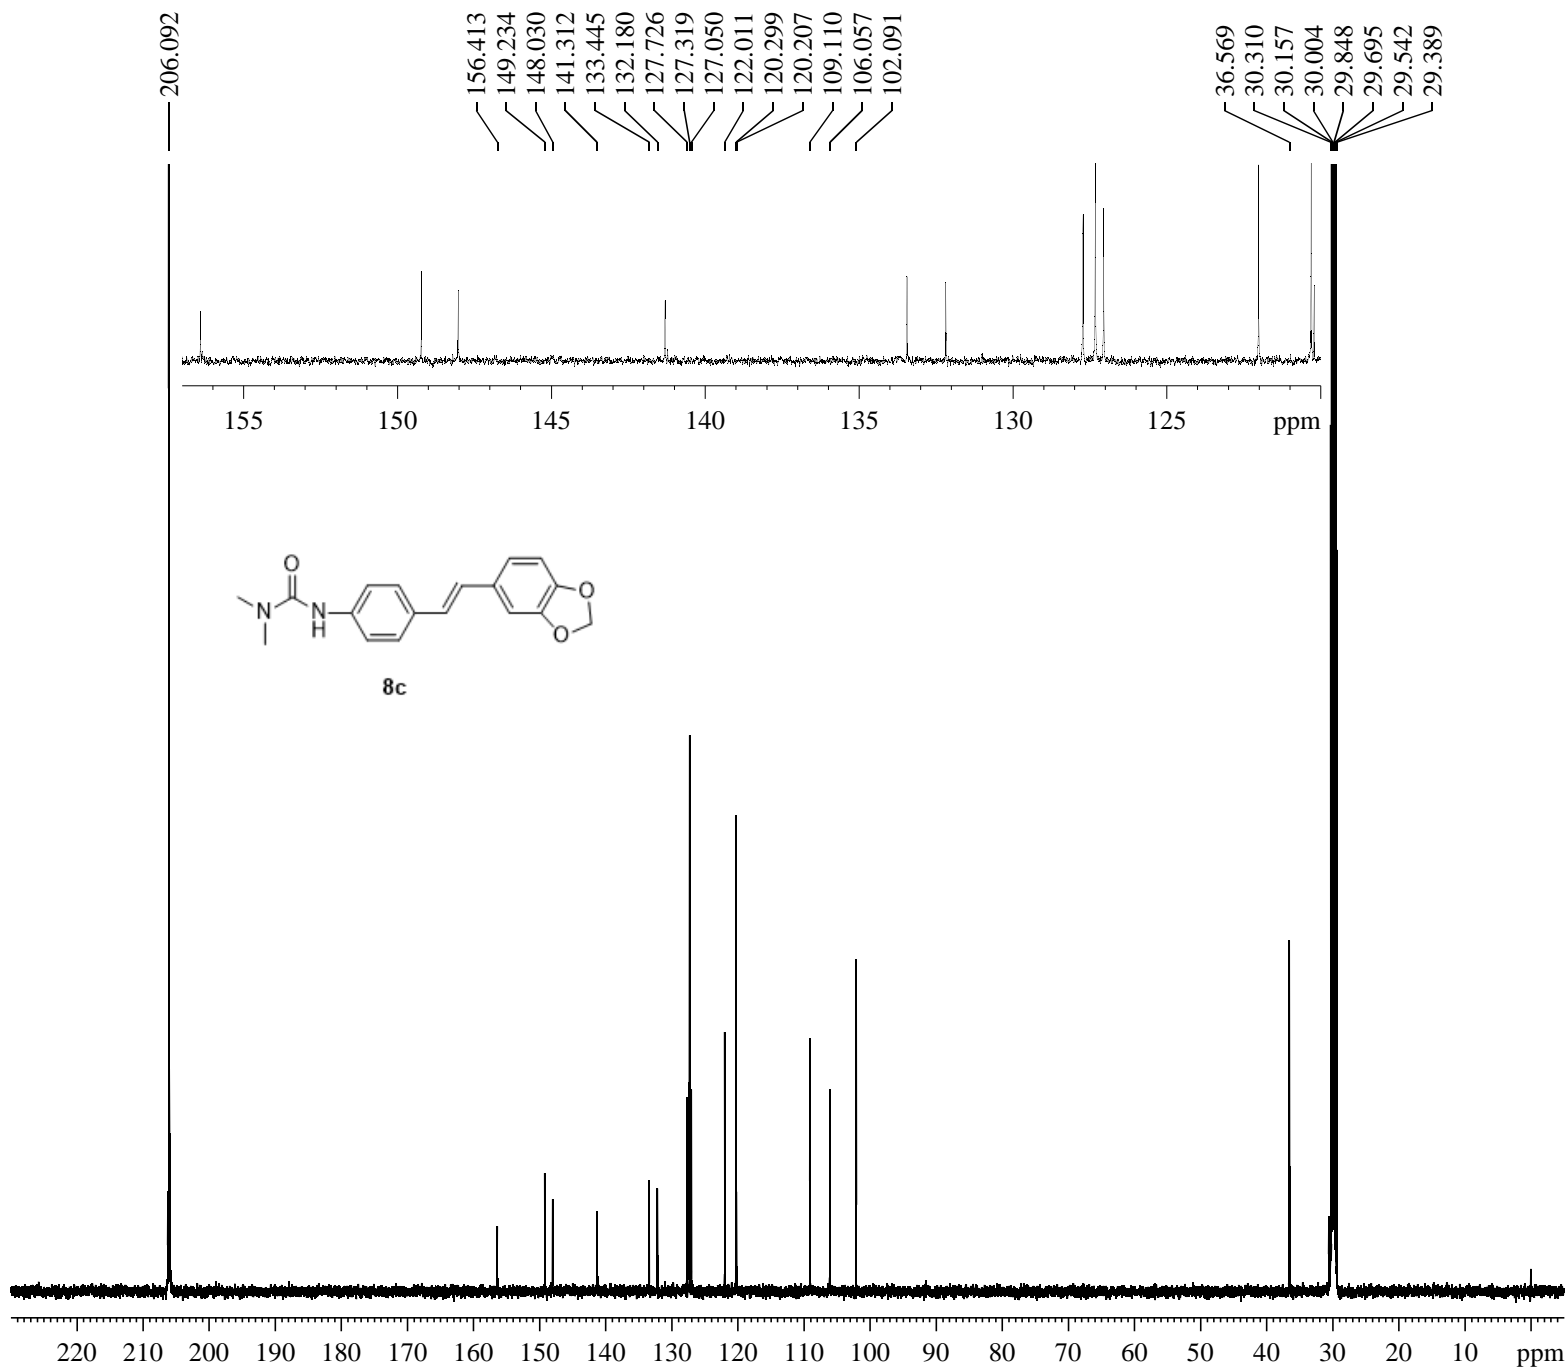

Current Data Parameters  
 NAME NMR15110917-WS-82  
 EXPNO 11  
 PROCNO 1

F2 - Acquisition Parameters  
 Date\_ 20151127  
 Time 21.42  
 INSTRUM spect  
 PROBHD 5 mm PABBO BB-  
 PULPROG zgpg30  
 TD 65536  
 SOLVENT Acetone  
 NS 1024  
 DS 4  
 SWH 34722.223 Hz  
 FIDRES 0.529819 Hz  
 AQ 0.9437184 sec  
 RG 198.55  
 DW 14.400 usec  
 DE 6.50 usec  
 TE 303.1 K  
 D1 2.00000000 sec  
 D11 0.03000000 sec  
 TD0 1

===== CHANNEL f1 =====  
 SFO1 125.7703637 MHz  
 NUC1 13C  
 P1 8.99 usec  
 PLW1 125.88999939 W

===== CHANNEL f2 =====  
 SFO2 500.1320005 MHz  
 NUC2 1H  
 CPDPRG[2] waltz16  
 PCPD2 80.00 usec  
 PLW2 19.95299911 W  
 PLW12 0.39528000 W  
 PLW13 0.25297999 W

F2 - Processing parameters  
 SI 32768  
 SF 125.7576707 MHz  
 WDW EM  
 SSB 0  
 LB 1.00 Hz  
 GB 0  
 PC 1.40

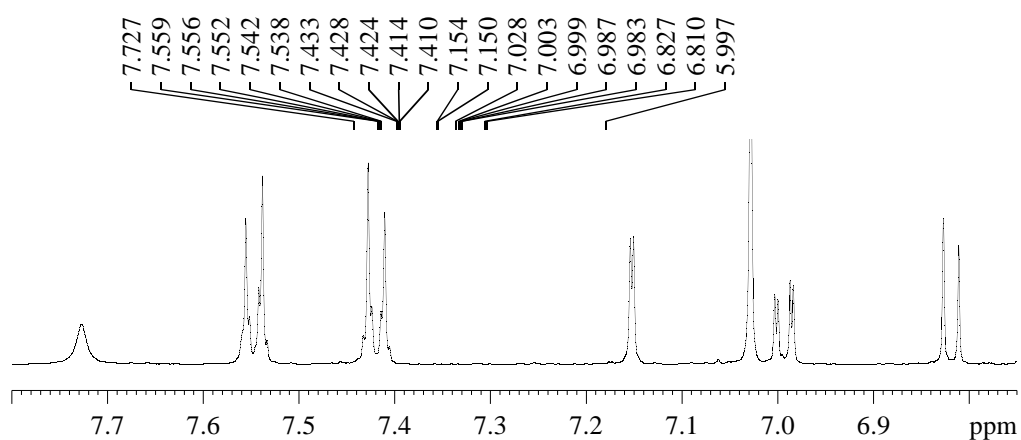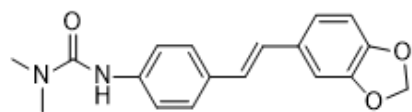

**8c**

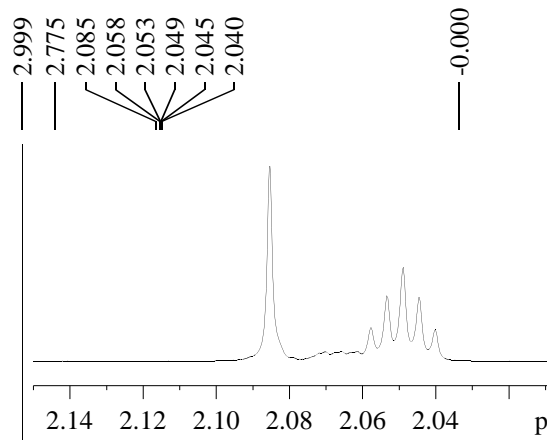

Current Data Parameters  
 NAME NMR15110917-WS-82  
 EXPNO 10  
 PROCNO 1

F2 - Acquisition Parameters  
 Date\_ 20151126  
 Time 13.00  
 INSTRUM spect  
 PROBHD 5 mm PABBO BB-  
 PULPROG zg30  
 TD 65536  
 SOLVENT Acetone  
 NS 128  
 DS 2  
 SWH 10000.000 Hz  
 FIDRES 0.152588 Hz  
 AQ 3.2767999 sec  
 RG 160.92  
 DW 50.000 usec  
 DE 6.50 usec  
 TE 303.2 K  
 D1 1.00000000 sec  
 TD0 1

===== CHANNEL f1 =====  
 SFO1 500.1330885 MHz  
 NUC1 1H  
 P1 11.26 usec  
 PLW1 19.95299911 W

F2 - Processing parameters  
 SI 65536  
 SF 500.1300088 MHz  
 WDW EM  
 SSB 0  
 LB 0.30 Hz  
 GB 0  
 PC 1.00

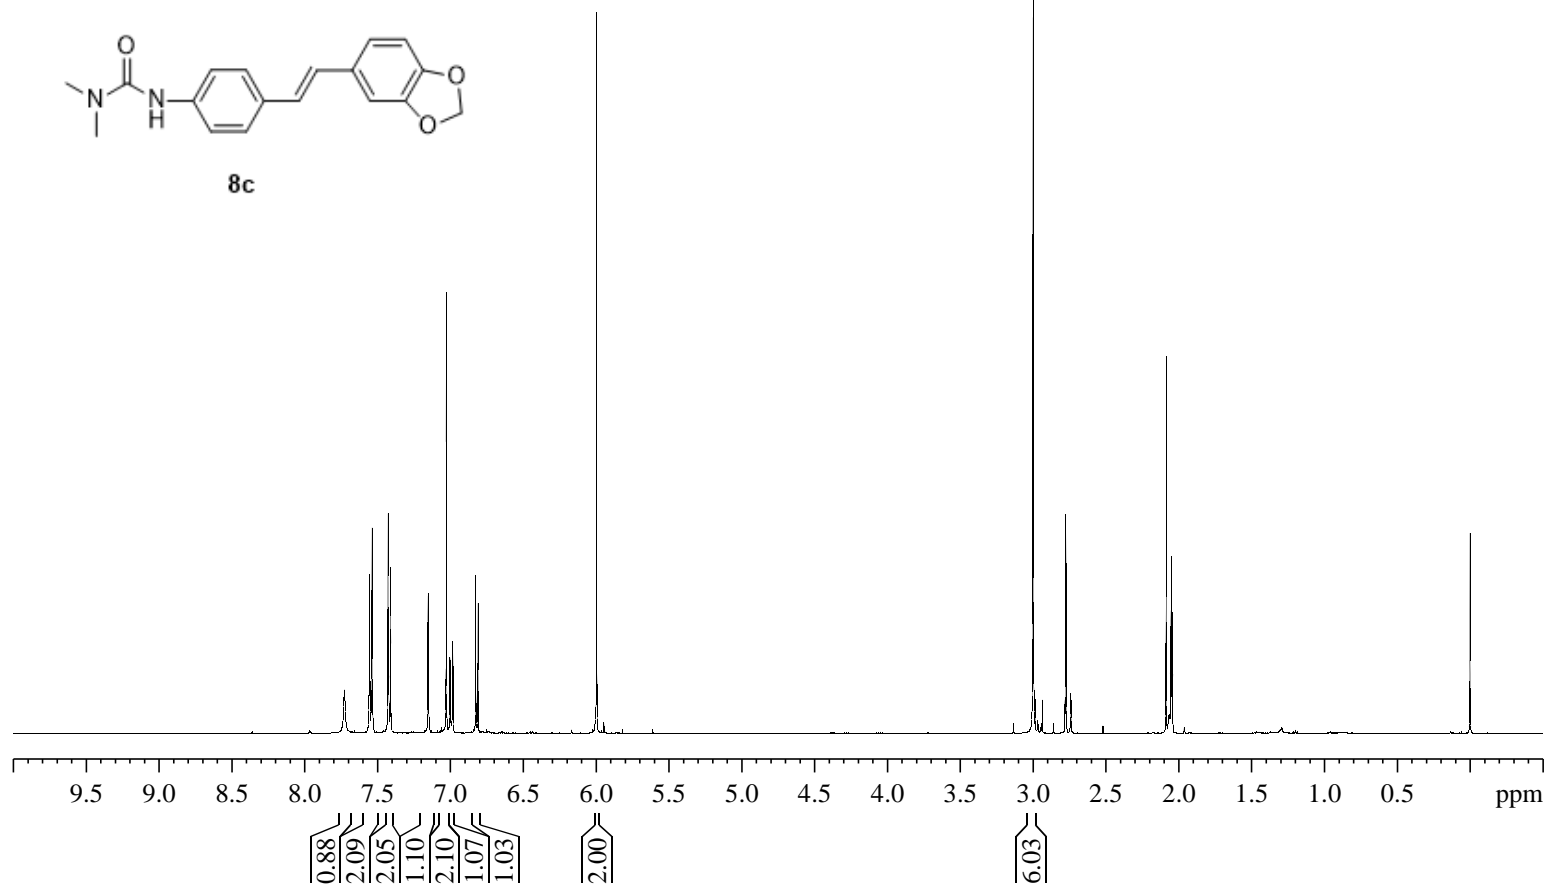

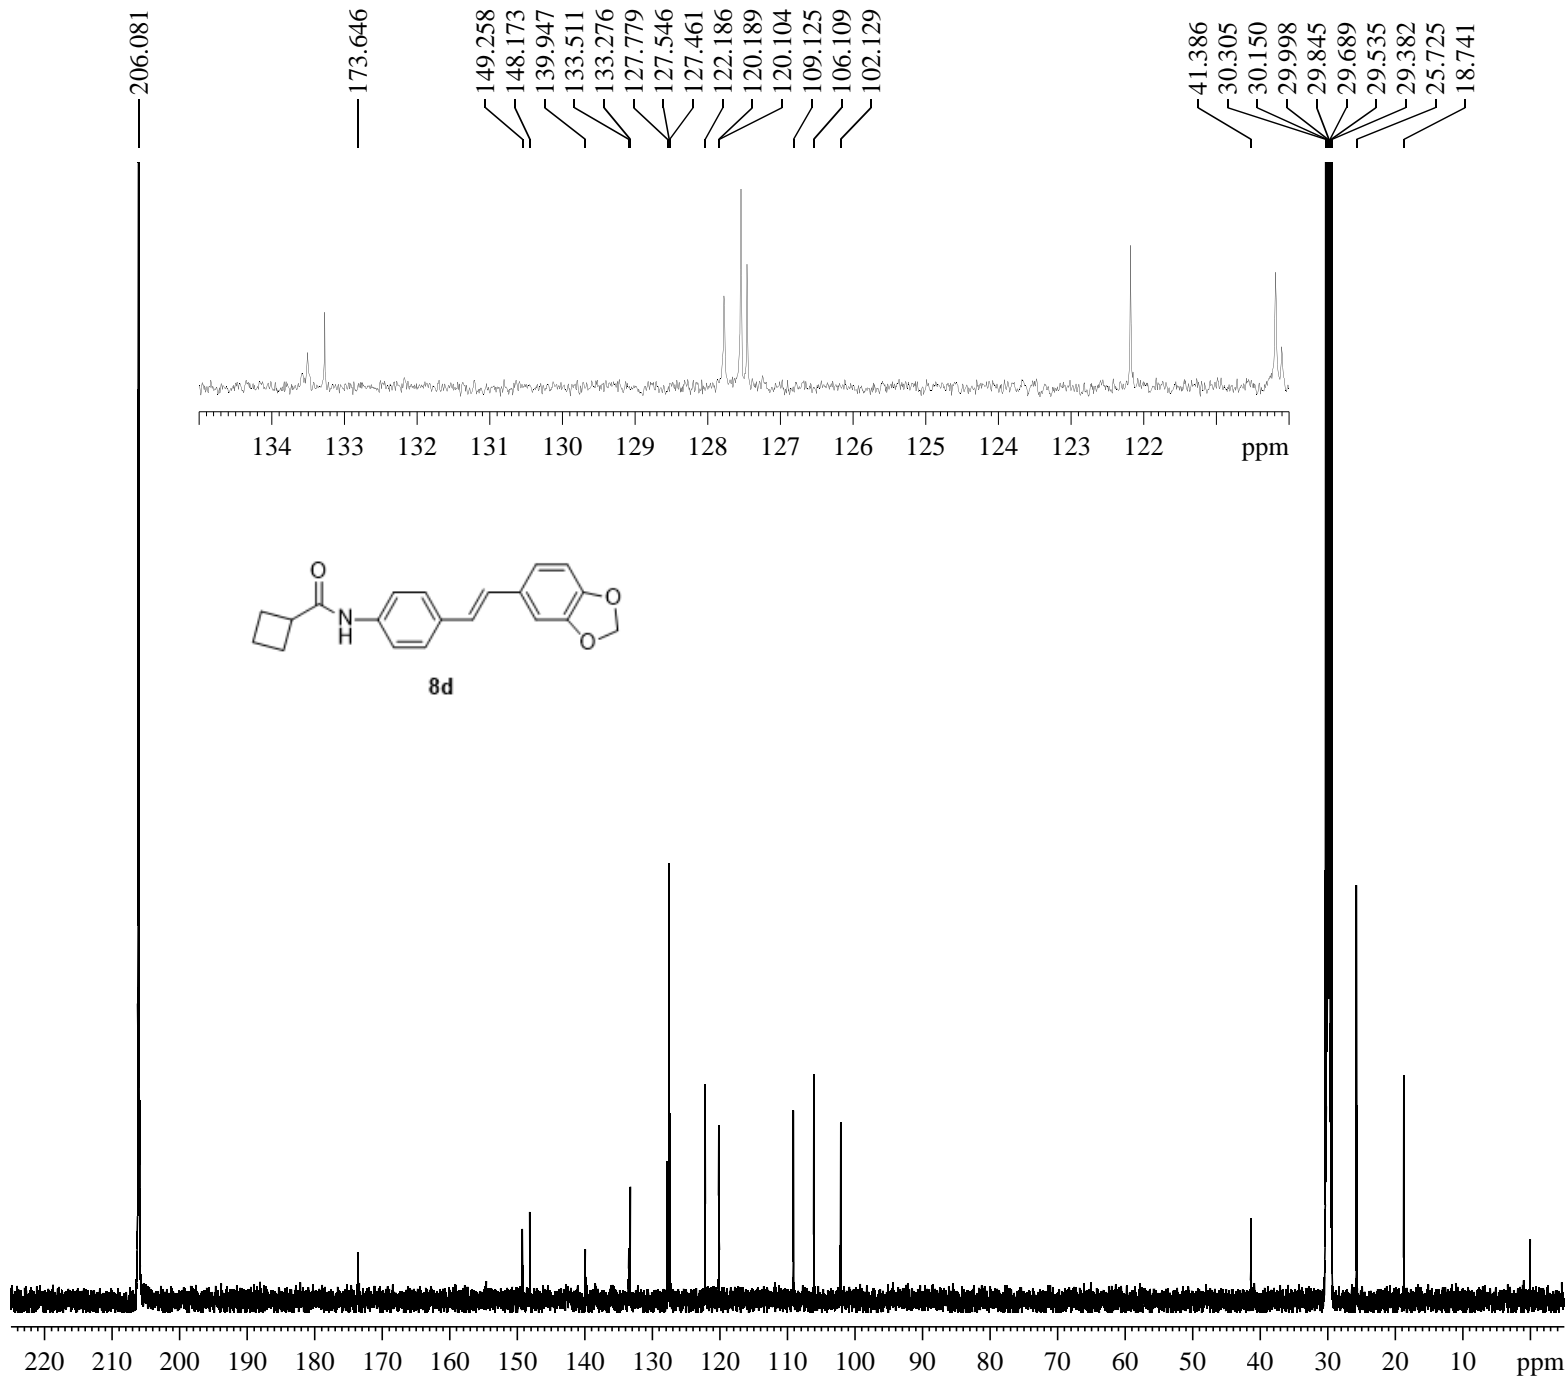

Current Data Parameters  
 NAME NMR15110918-WS-83  
 EXPNO 11  
 PROCNO 1

F2 - Acquisition Parameters  
 Date\_ 20151127  
 Time 22.45  
 INSTRUM spect  
 PROBHD 5 mm PABBO BB-  
 PULPROG zgpg30  
 TD 65536  
 SOLVENT Acetone  
 NS 1200  
 DS 4  
 SWH 34722.223 Hz  
 FIDRES 0.529819 Hz  
 AQ 0.9437184 sec  
 RG 198.55  
 DW 14.400 usec  
 DE 6.50 usec  
 TE 303.2 K  
 D1 2.00000000 sec  
 D11 0.03000000 sec  
 TD0 1

===== CHANNEL f1 =====  
 SFO1 125.7703637 MHz  
 NUC1 13C  
 P1 8.99 usec  
 PLW1 125.88999939 W

===== CHANNEL f2 =====  
 SFO2 500.1320005 MHz  
 NUC2 1H  
 CPDPRG[2] waltz16  
 PCPD2 80.00 usec  
 PLW2 19.95299911 W  
 PLW12 0.39528000 W  
 PLW13 0.25297999 W

F2 - Processing parameters  
 SI 32768  
 SF 125.7576707 MHz  
 WDW EM  
 SSB 0  
 LB 1.00 Hz  
 GB 0  
 PC 1.40

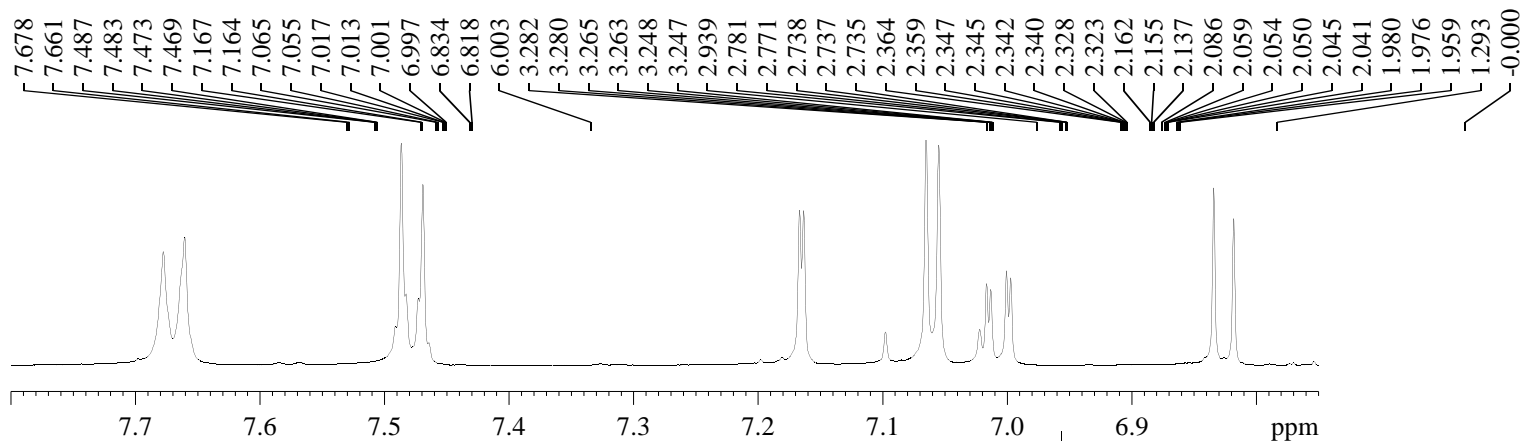

Current Data Parameters  
 NAME NMR15110918-WS-83  
 EXPNO 10  
 PROCNO 1

F2 - Acquisition Parameters  
 Date\_ 20151126  
 Time 13.12  
 INSTRUM spect  
 PROBHD 5 mm PABBO BB-  
 PULPROG zg30  
 TD 65536  
 SOLVENT Acetone  
 NS 128  
 DS 2  
 SWH 10000.000 Hz  
 FIDRES 0.152588 Hz  
 AQ 3.2767999 sec  
 RG 198.55  
 DW 50.000 usec  
 DE 6.50 usec  
 TE 303.2 K  
 D1 1.00000000 sec  
 TD0 1

===== CHANNEL f1 =====  
 SFO1 500.1330885 MHz  
 NUC1 1H  
 P1 11.26 usec  
 PLW1 19.95299911 W

F2 - Processing parameters  
 SI 65536  
 SF 500.1300085 MHz  
 WDW EM  
 SSB 0  
 LB 0.30 Hz  
 GB 0  
 PC 1.00

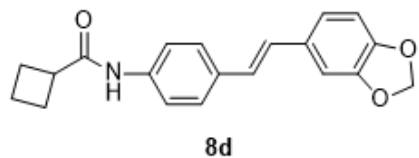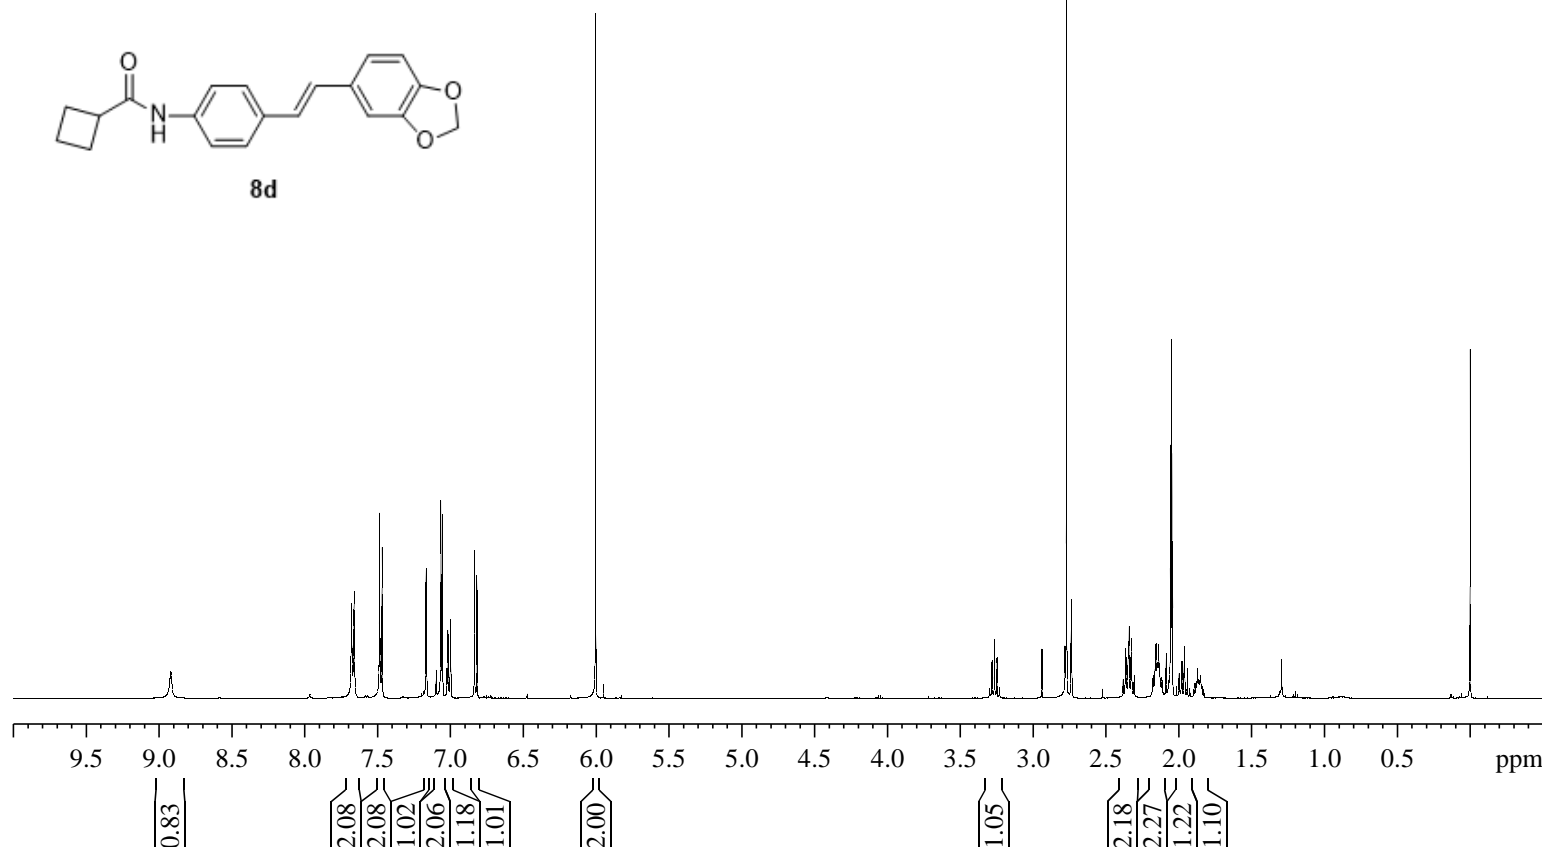

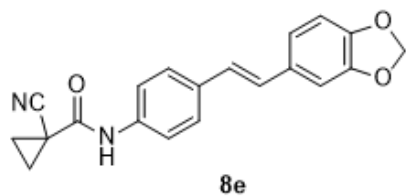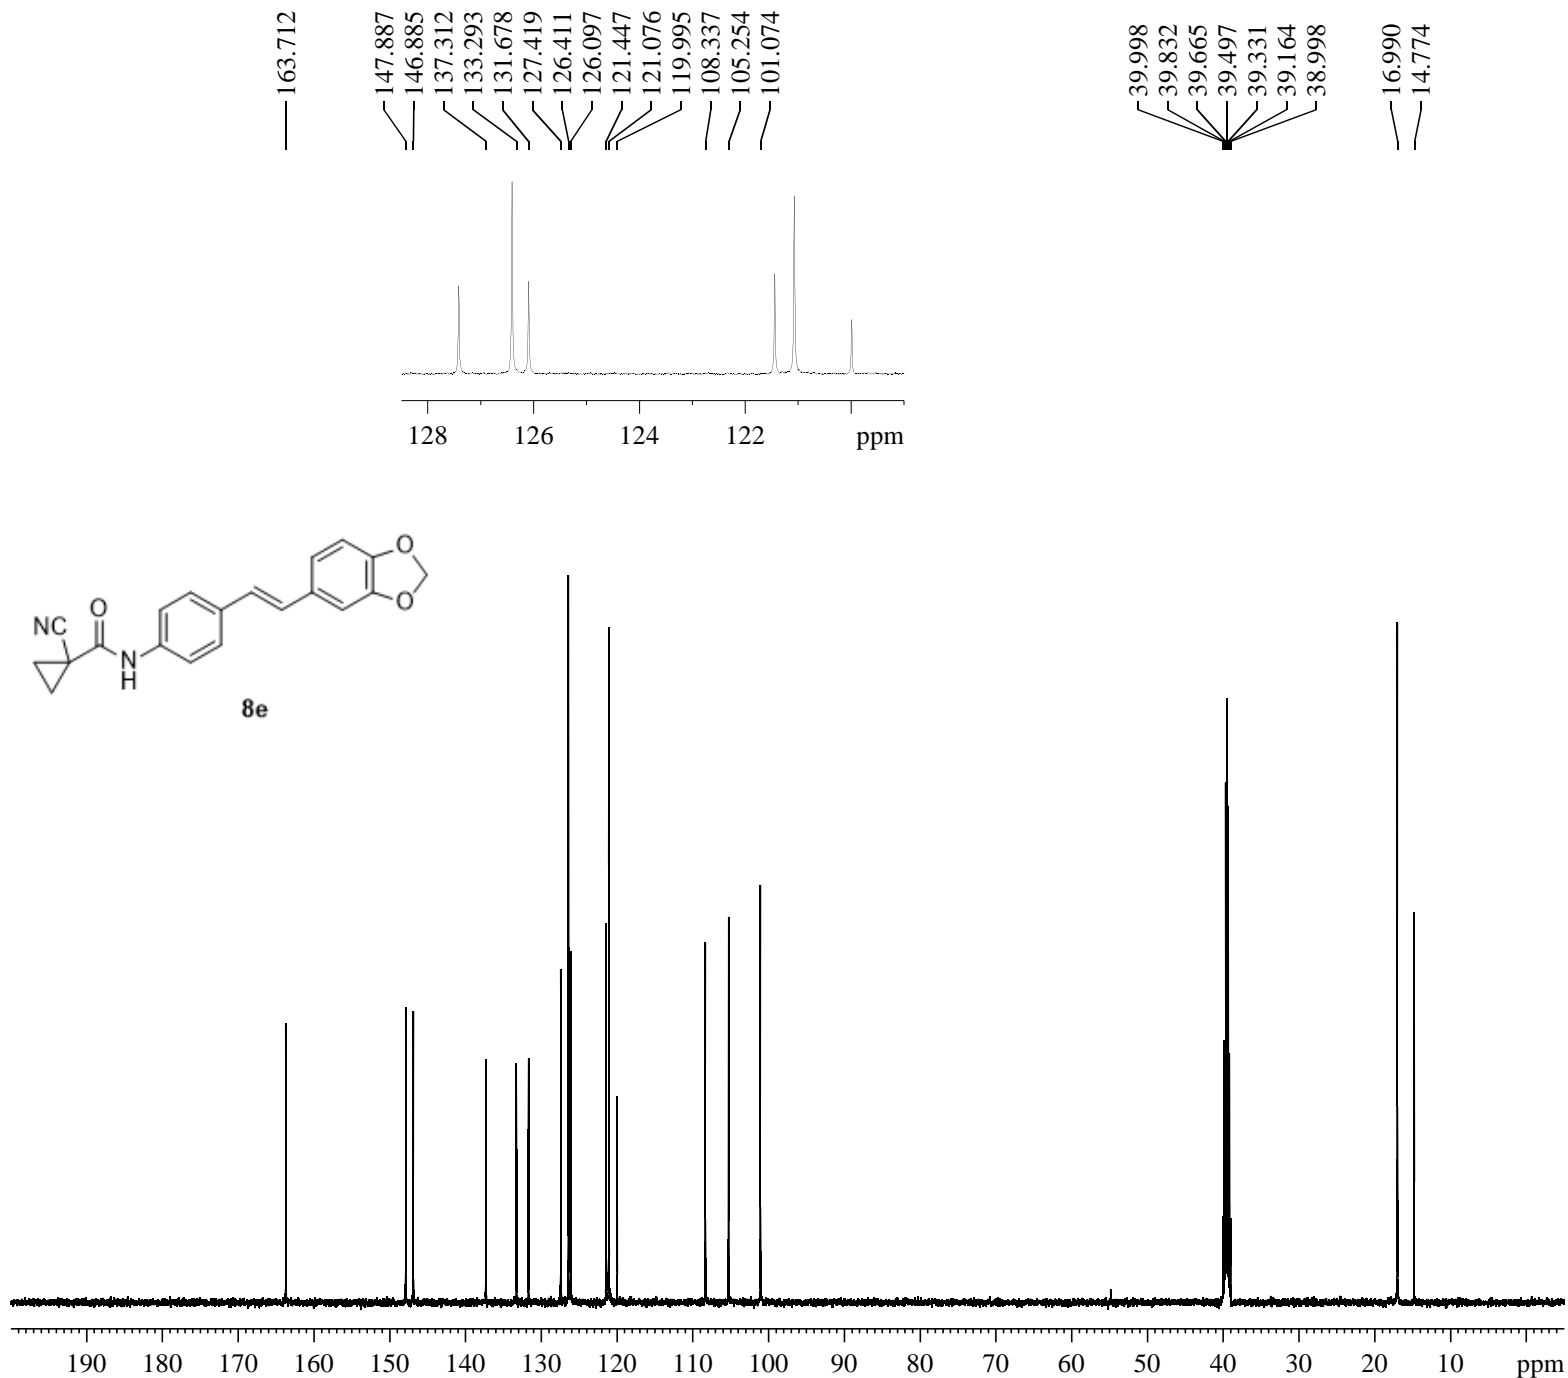

Current Data Parameters  
 NAME NMR16100058-LSS-50  
 EXPNO 2  
 PROCNO 1

F2 - Acquisition Parameters  
 Date\_ 20161017  
 Time 17.04  
 INSTRUM spect  
 PROBHD 5 mm PABBO BB-  
 PULPROG zgpg30  
 TD 65536  
 SOLVENT DMSO  
 NS 64  
 DS 4  
 SWH 34722.223 Hz  
 FIDRES 0.529819 Hz  
 AQ 0.9437184 sec  
 RG 198.55  
 DW 14.400 usec  
 DE 6.50 usec  
 TE 298.3 K  
 D1 2.00000000 sec  
 D11 0.03000000 sec  
 TD0 1

===== CHANNEL f1 =====  
 SFO1 125.7703637 MHz  
 NUC1 13C  
 P1 9.12 usec  
 PLW1 125.88999939 W

===== CHANNEL f2 =====  
 SFO2 500.1320005 MHz  
 NUC2 1H  
 CPDPRG[2] waltz16  
 PCPD2 80.00 usec  
 PLW2 19.95299911 W  
 PLW12 0.41303000 W  
 PLW13 0.26434001 W

F2 - Processing parameters  
 SI 32768  
 SF 125.7578475 MHz  
 WDW EM  
 SSB 0  
 LB 1.00 Hz  
 GB 0  
 PC 1.40

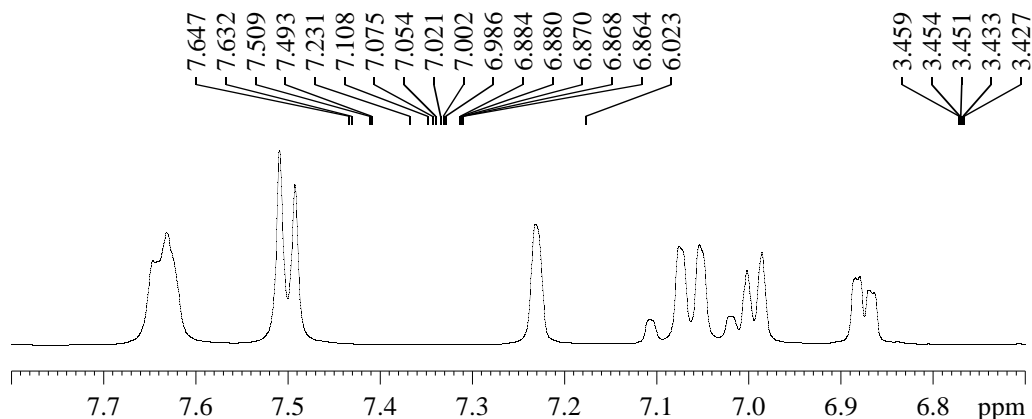

Current Data Parameters  
 NAME NMR16100058-LSS-50  
 EXPNO 1  
 PROCNO 1

F2 - Acquisition Parameters  
 Date\_ 20161017  
 Time 16.10  
 INSTRUM spect  
 PROBHD 5 mm PABBO BB-  
 PULPROG zg30  
 TD 65536  
 SOLVENT DMSO  
 NS 16  
 DS 2  
 SWH 10000.000 Hz  
 FIDRES 0.152588 Hz  
 AQ 3.2767999 sec  
 RG 32.04  
 DW 50.000 usec  
 DE 6.50 usec  
 TE 298.1 K  
 D1 1.00000000 sec  
 TD0 1

===== CHANNEL f1 =====  
 SFO1 500.1330885 MHz  
 NUC1 1H  
 P1 11.51 usec  
 PLW1 19.95299911 W

F2 - Processing parameters  
 SI 65536  
 SF 500.1300044 MHz  
 WDW EM  
 SSB 0  
 LB 0.30 Hz  
 GB 0  
 PC 1.00

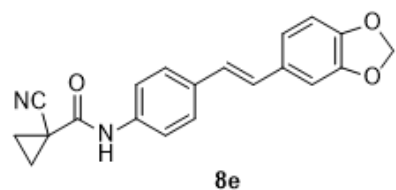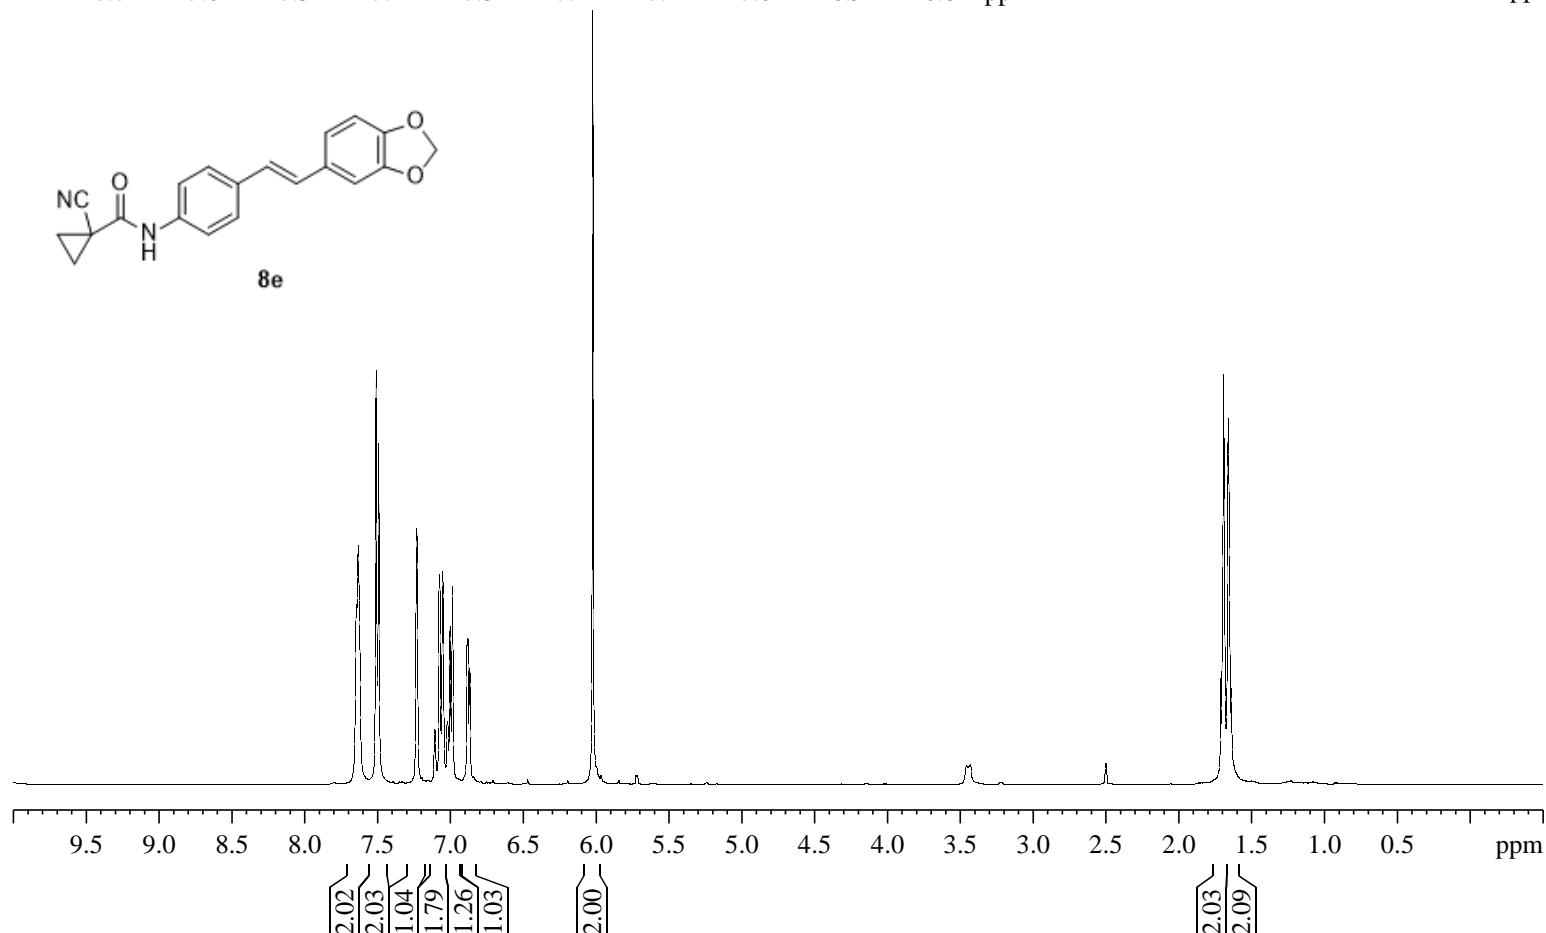



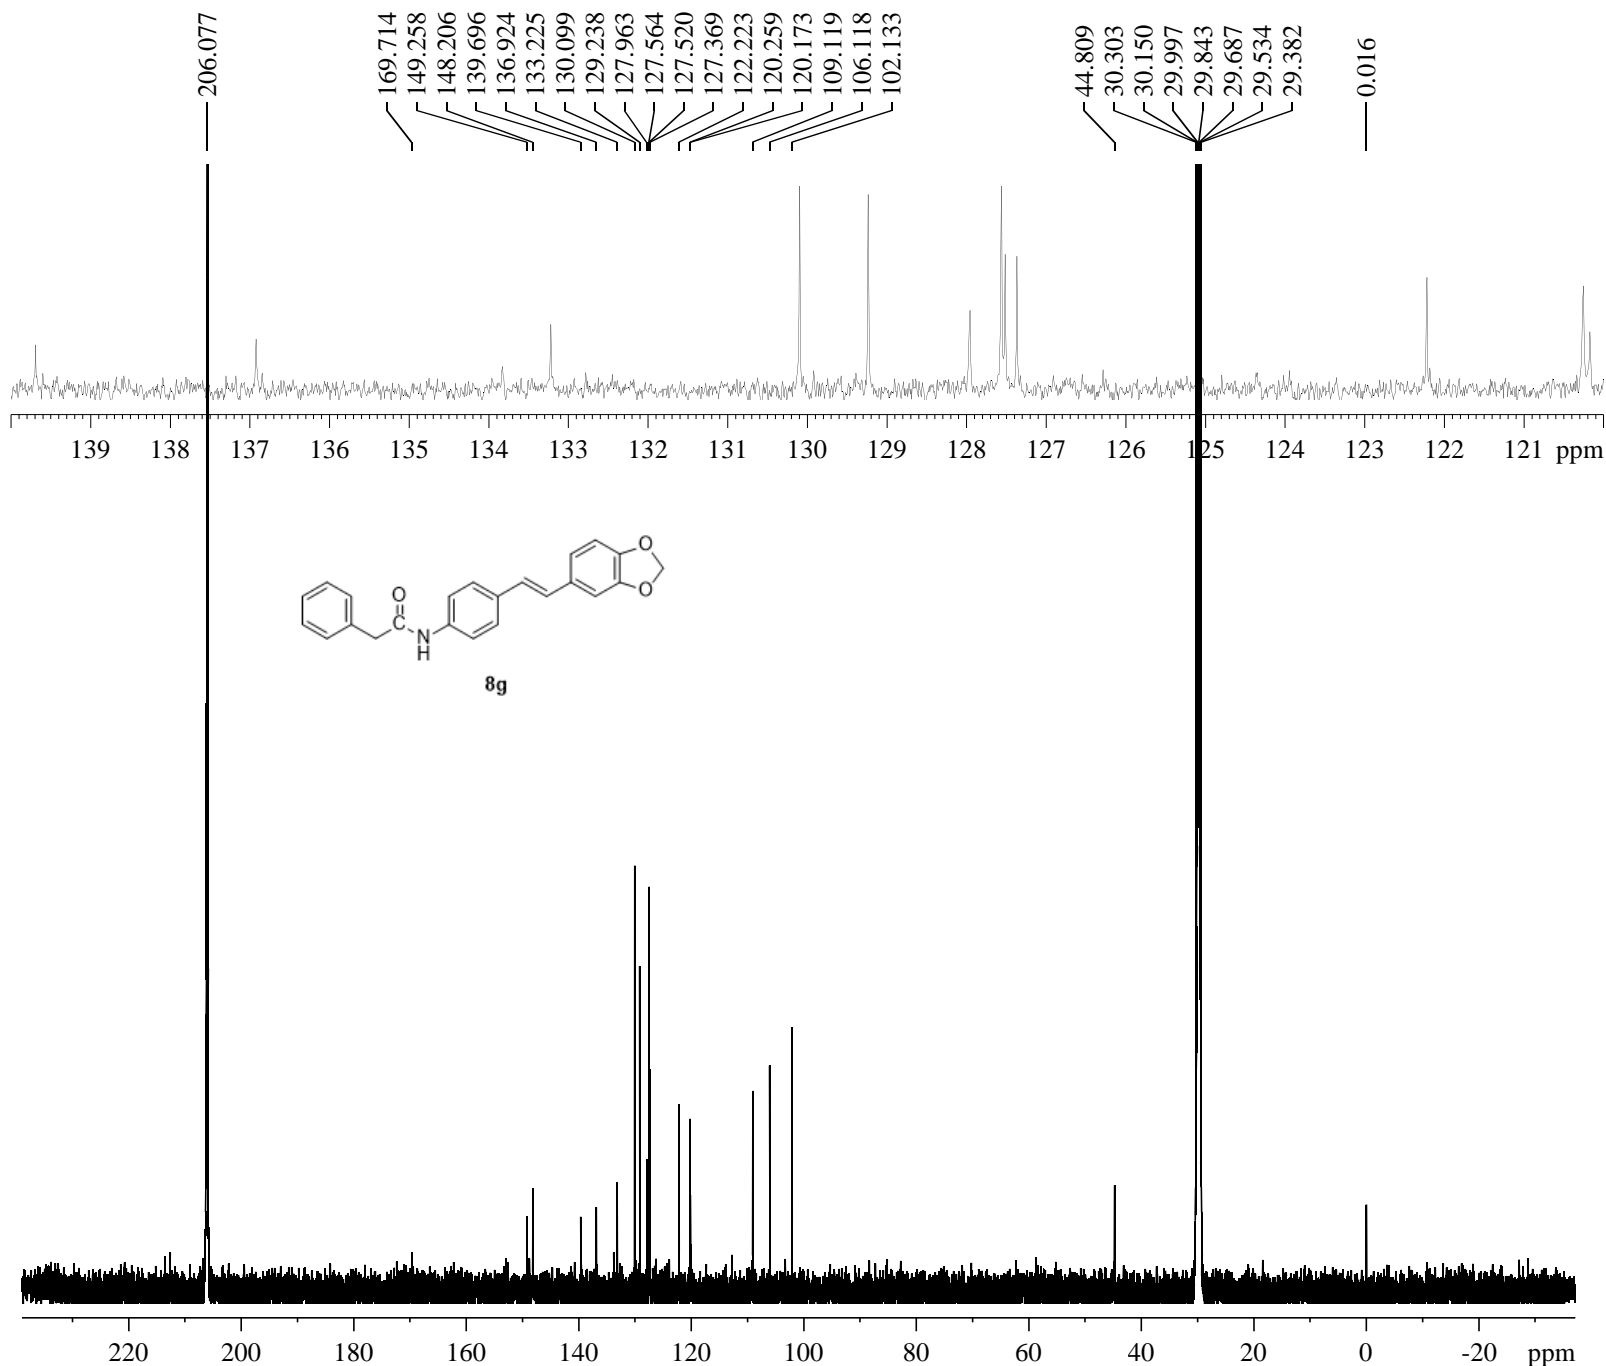

Current Data Parameters  
 NAME NMR15120053-LSS-16  
 EXPNO 2  
 PROCNO 1

F2 - Acquisition Parameters  
 Date\_ 20151204  
 Time 4.34  
 INSTRUM spect  
 PROBHD 5 mm PABBO BB-  
 PULPROG zgpg30  
 TD 65536  
 SOLVENT Acetone  
 NS 1200  
 DS 4  
 SWH 34722.223 Hz  
 FIDRES 0.529819 Hz  
 AQ 0.9437184 sec  
 RG 198.55  
 DW 14.400 usec  
 DE 6.50 usec  
 TE 303.2 K  
 D1 2.00000000 sec  
 D11 0.03000000 sec  
 TD0 1

===== CHANNEL f1 =====  
 SFO1 125.7703637 MHz  
 NUC1 13C  
 P1 8.99 usec  
 PLW1 125.88999939 W

===== CHANNEL f2 =====  
 SFO2 500.1320005 MHz  
 NUC2 1H  
 CPDPRG[2] waltz16  
 PCPD2 80.00 usec  
 PLW2 19.95299911 W  
 PLW12 0.39528000 W  
 PLW13 0.25297999 W

F2 - Processing parameters  
 SI 32768  
 SF 125.7576707 MHz  
 WDW EM  
 SSB 0  
 LB 1.00 Hz  
 GB 0  
 PC 1.40

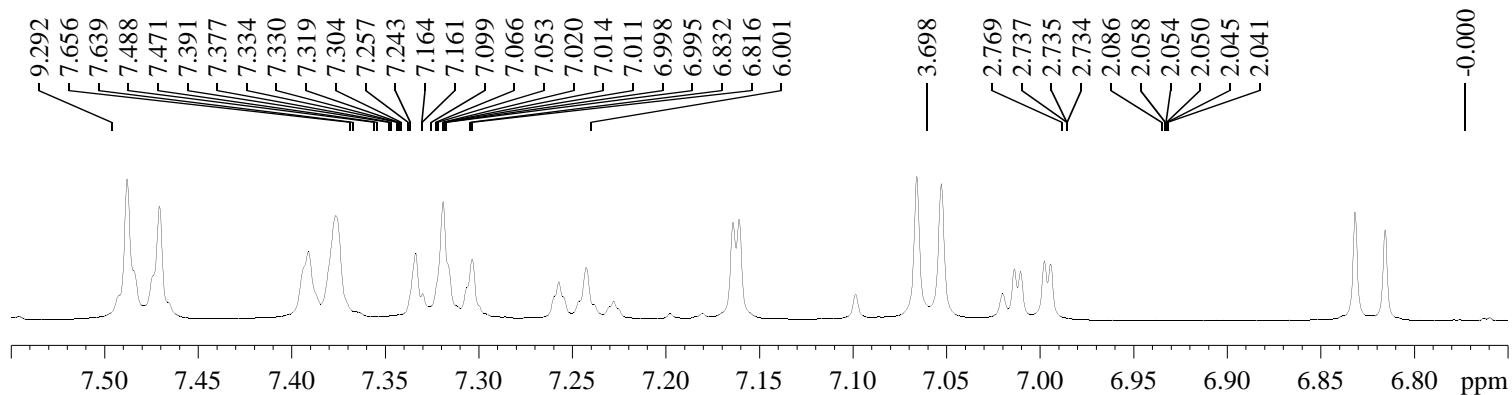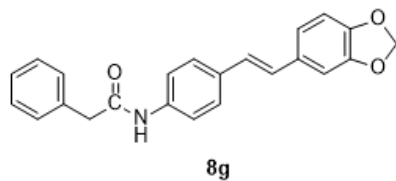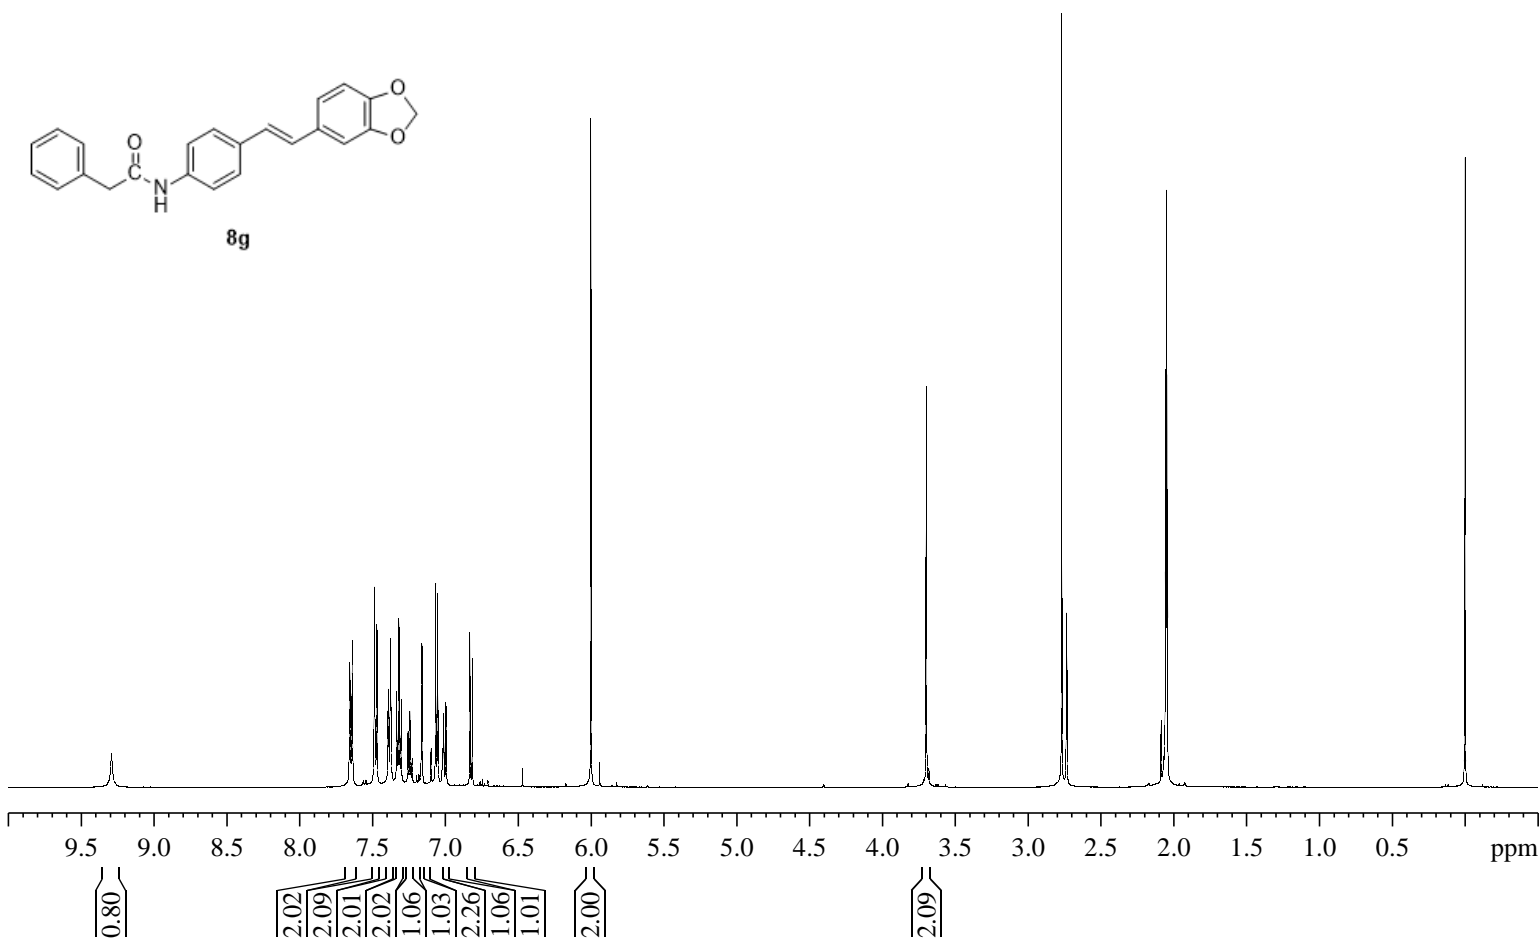

Current Data Parameters  
 NAME NMR15120053-LSS-16  
 EXPNO 1  
 PROCNO 1

F2 - Acquisition Parameters  
 Date\_ 20151202  
 Time 15.52  
 INSTRUM spect  
 PROBHD 5 mm PABBO BB-  
 PULPROG zg30  
 TD 65536  
 SOLVENT Acetone  
 NS 128  
 DS 2  
 SWH 10000.000 Hz  
 FIDRES 0.152588 Hz  
 AQ 3.2767999 sec  
 RG 198.55  
 DW 50.000 usec  
 DE 6.50 usec  
 TE 303.2 K  
 D1 1.00000000 sec  
 TD0 1

===== CHANNEL f1 =====  
 SFO1 500.1330885 MHz  
 NUC1 1H  
 P1 11.26 usec  
 PLW1 19.95299911 W

F2 - Processing parameters  
 SI 65536  
 SF 500.1300085 MHz  
 WDW EM  
 SSB 0  
 LB 0.30 Hz  
 GB 0  
 PC 1.00

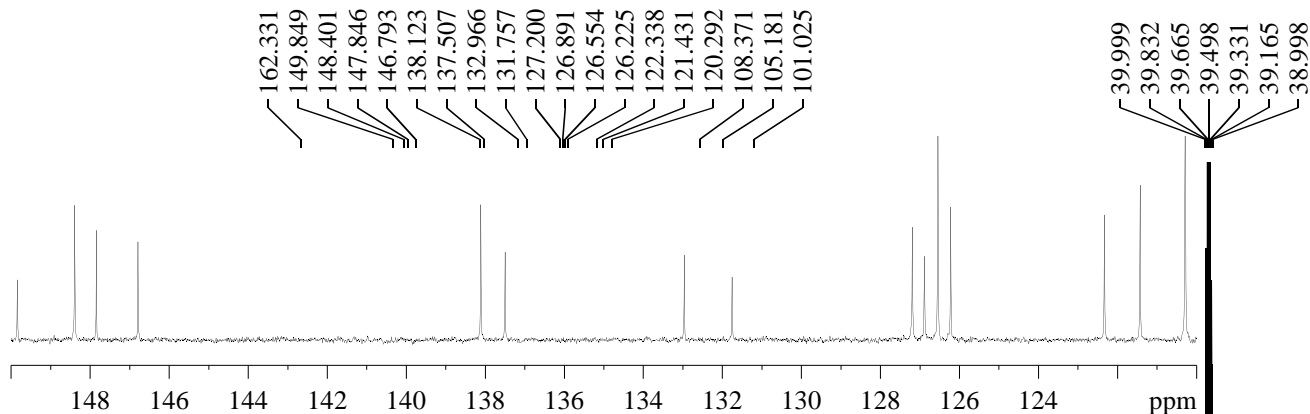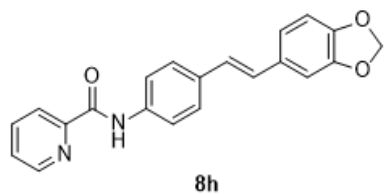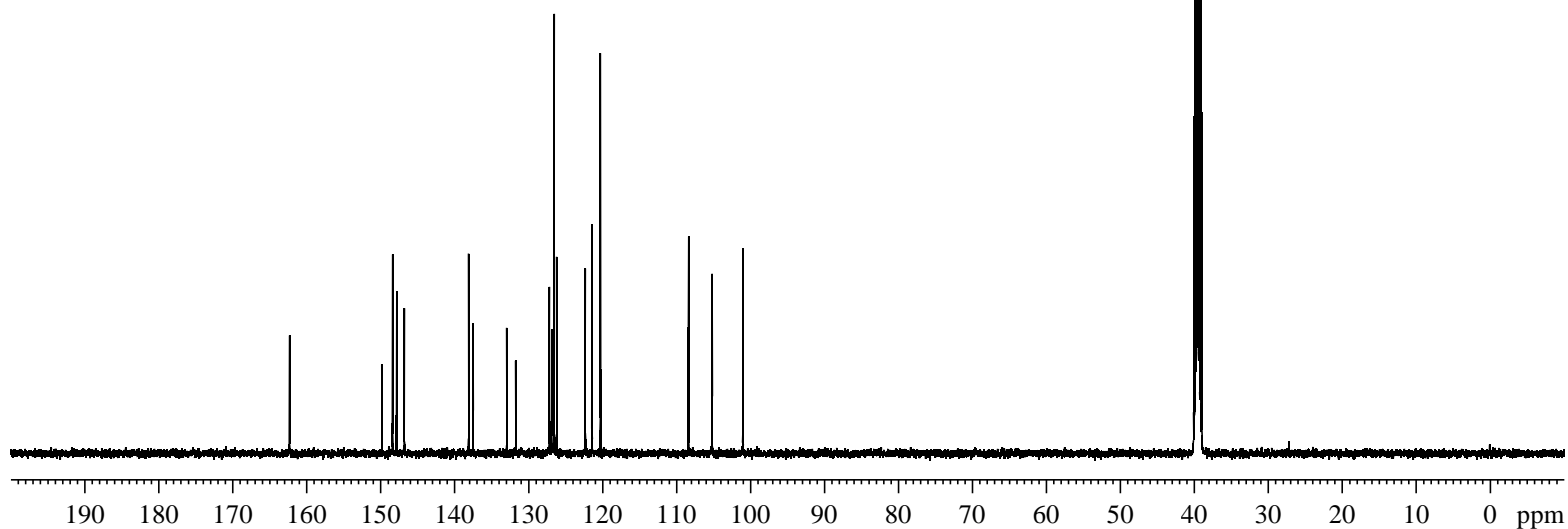

Current Data Parameters  
 NAME NMR16010803-LSS-20  
 EXPNO 1  
 PROCNO 1

F2 - Acquisition Parameters  
 Date\_ 20160130  
 Time 0.07  
 INSTRUM spect  
 PROBHD 5 mm PABBO BB-  
 PULPROG zgpg30  
 TD 65536  
 SOLVENT DMSO  
 NS 1024  
 DS 4  
 SWH 34722.223 Hz  
 FIDRES 0.529819 Hz  
 AQ 0.9437184 sec  
 RG 198.55  
 DW 14.400 usec  
 DE 6.50 usec  
 TE 298.2 K  
 D1 2.00000000 sec  
 D11 0.03000000 sec  
 TD0 1

===== CHANNEL f1 =====  
 SFO1 125.7703637 MHz  
 NUC1 13C  
 P1 8.99 usec  
 PLW1 125.88999939 W

===== CHANNEL f2 =====  
 SFO2 500.1320005 MHz  
 NUC2 1H  
 CPDPRG[2] waltz16  
 PCPD2 80.00 usec  
 PLW2 19.95299911 W  
 PLW12 0.39528000 W  
 PLW13 0.25297999 W

F2 - Processing parameters  
 SI 32768  
 SF 125.7578517 MHz  
 WDW EM  
 SSB 0  
 LB 1.00 Hz  
 GB 0  
 PC 1.40

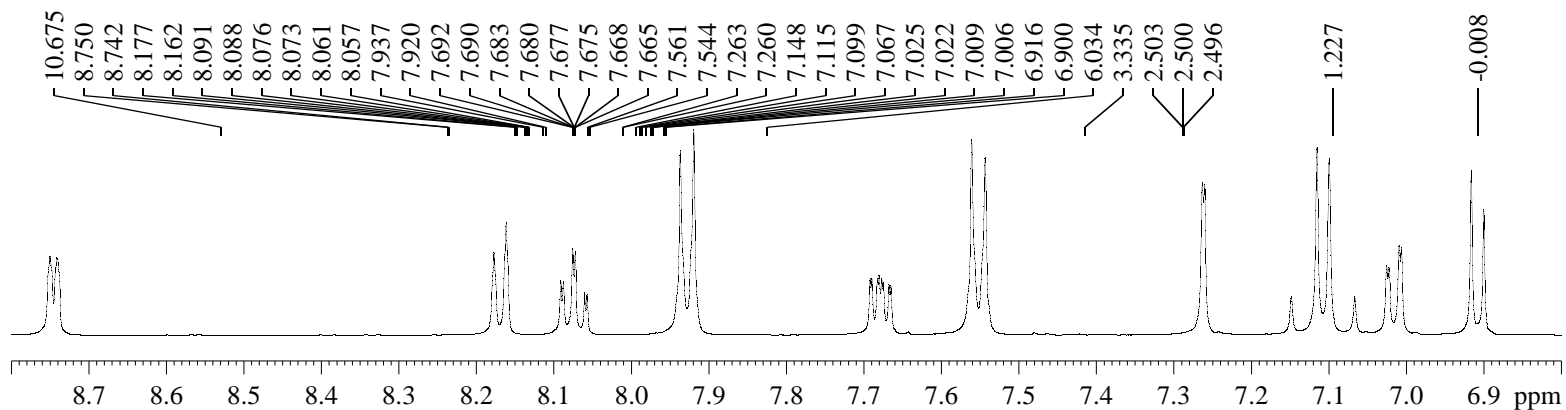

Current Data Parameters  
 NAME NMR16010314-LSS-20  
 EXPNO 1  
 PROCNO 1

F2 - Acquisition Parameters  
 Date\_ 20160121  
 Time 12.14  
 INSTRUM spect  
 PROBHD 5 mm PABBO BB-  
 PULPROG zg30  
 TD 65536  
 SOLVENT DMSO  
 NS 128  
 DS 2  
 SWH 10000.000 Hz  
 FIDRES 0.152588 Hz  
 AQ 3.2767999 sec  
 RG 122.2  
 DW 50.000 usec  
 DE 6.50 usec  
 TE 298.1 K  
 D1 1.00000000 sec  
 TD0 1

===== CHANNEL f1 =====  
 SFO1 500.1330885 MHz  
 NUC1 1H  
 P1 11.26 usec  
 PLW1 19.95299911 W

F2 - Processing parameters  
 SI 65536  
 SF 500.1300039 MHz  
 WDW EM  
 SSB 0  
 LB 0.30 Hz  
 GB 0  
 PC 1.00

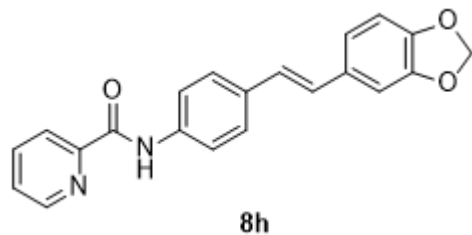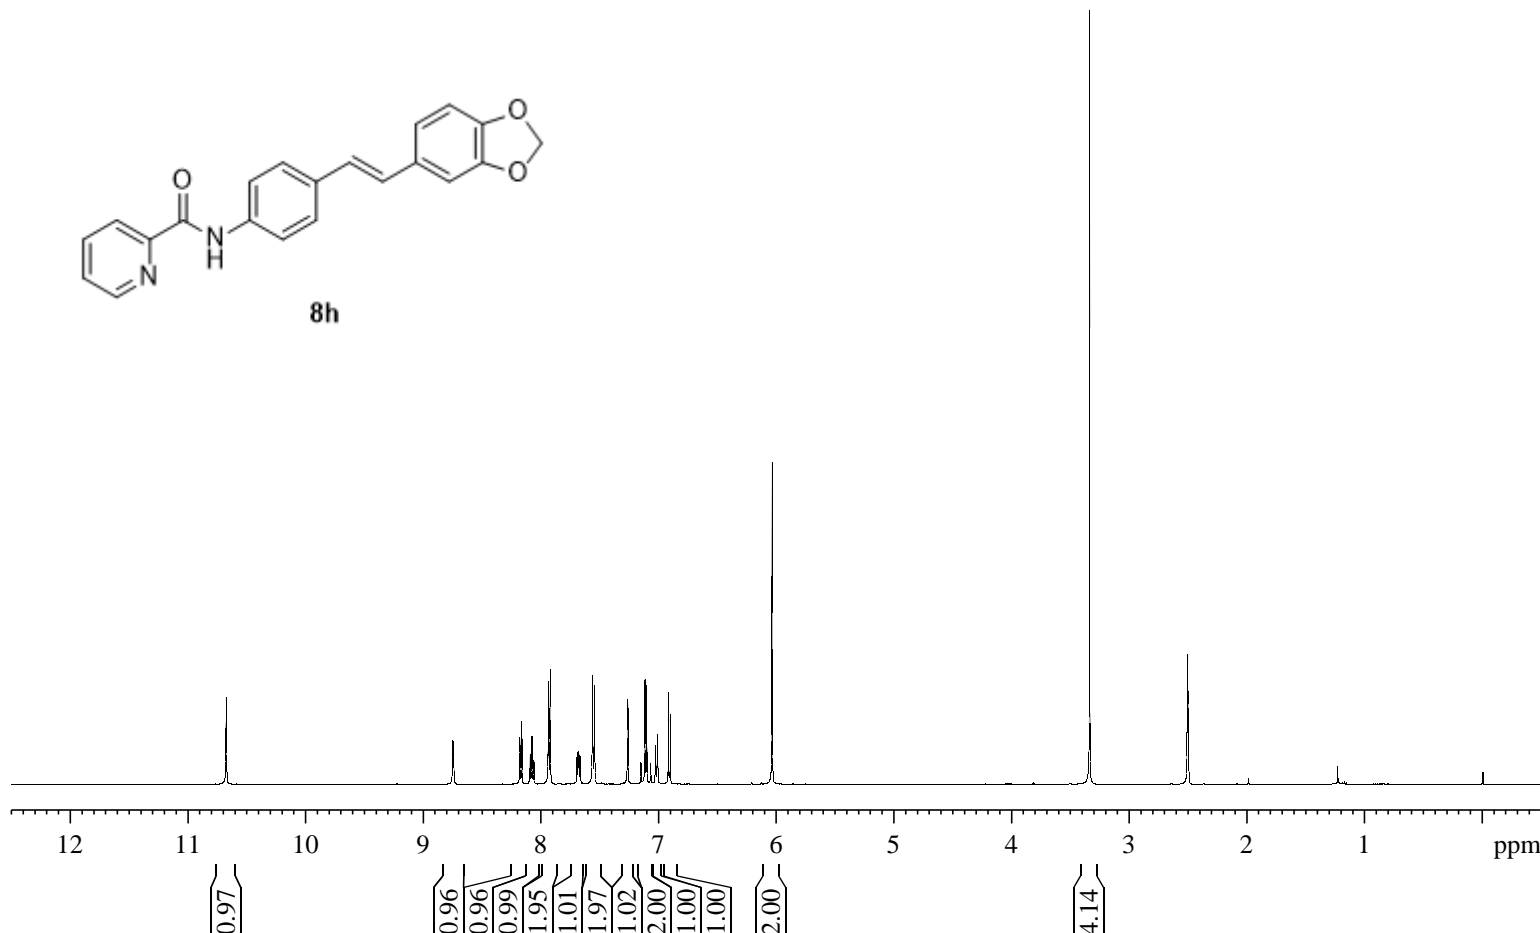

— 206.206

149.218  
148.232  
138.928  
134.188  
133.073  
128.320  
127.908  
127.091  
122.279  
120.922  
109.109  
106.126  
102.123

38.448  
30.308  
30.153  
29.999  
29.846  
29.693  
29.537  
29.383

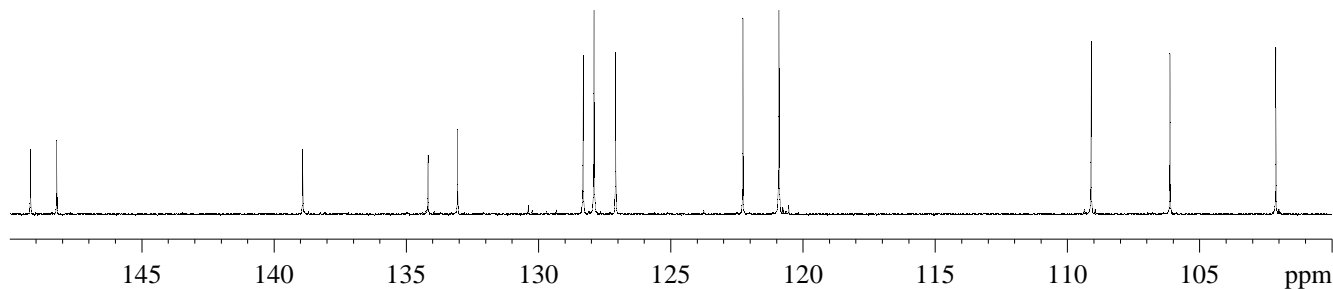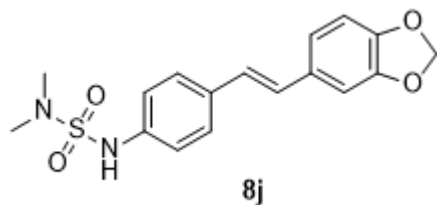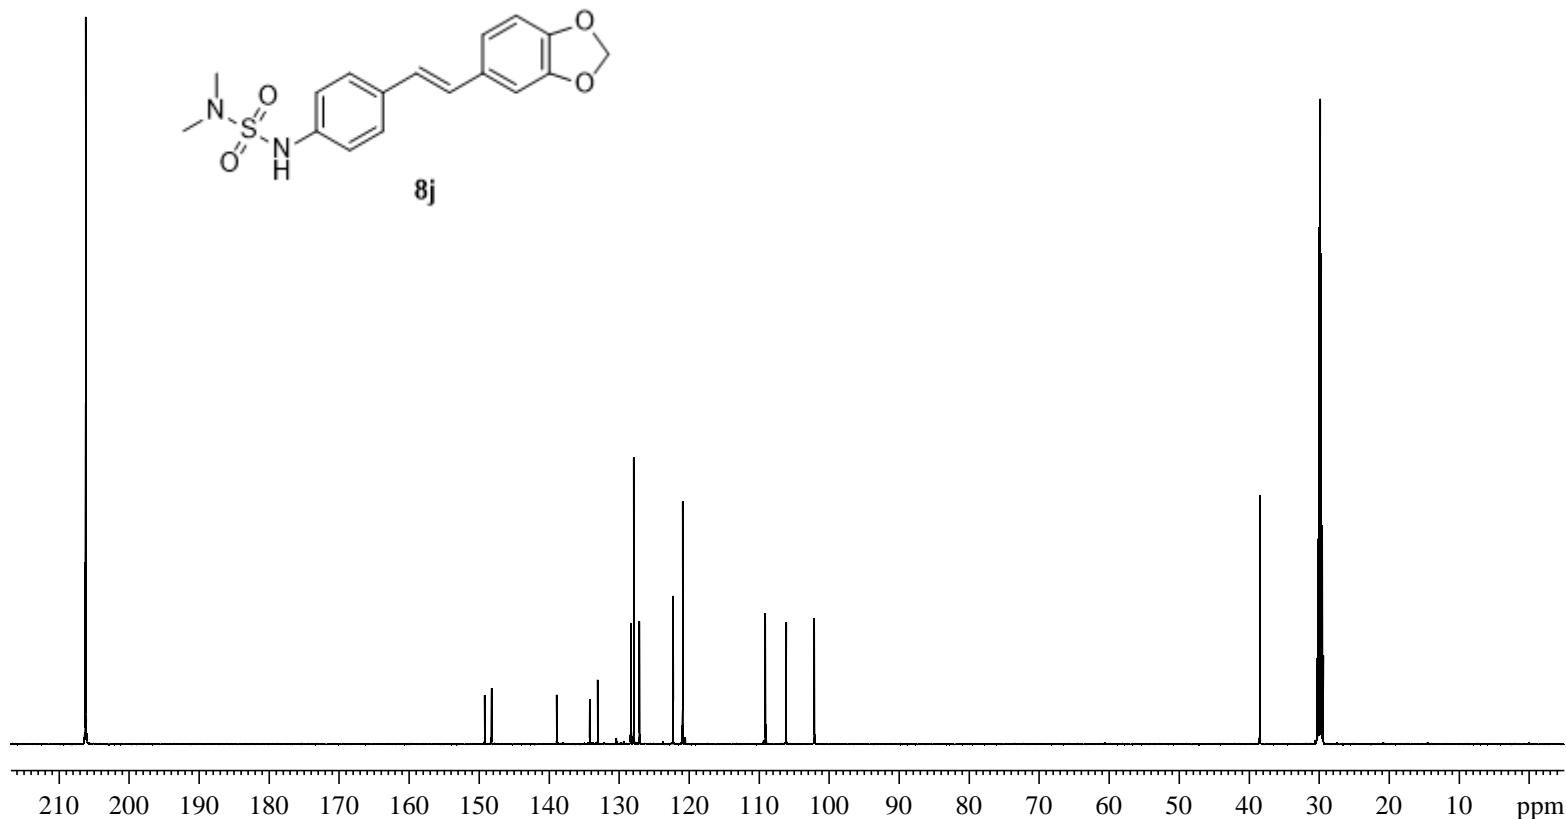

Current Data Parameters  
NAME NMR15120810-LSS-17  
EXPNO 10  
PROCNO 1

F2 - Acquisition Parameters  
Date\_ 20151223  
Time 4.42  
INSTRUM spect  
PROBHD 5 mm PABBO BB-  
PULPROG zgpg30  
TD 65536  
SOLVENT Acetone  
NS 1200  
DS 4  
SWH 34722.223 Hz  
FIDRES 0.529819 Hz  
AQ 0.9437184 sec  
RG 198.55  
DW 14.400 usec  
DE 6.50 usec  
TE 303.2 K  
D1 2.00000000 sec  
D11 0.03000000 sec  
TD0 1

===== CHANNEL f1 =====  
SFO1 125.7703637 MHz  
NUC1 13C  
P1 8.99 usec  
PLW1 125.88999939 W

===== CHANNEL f2 =====  
SFO2 500.1320005 MHz  
NUC2 1H  
CPDPRG[2] waltz16  
PCPD2 80.00 usec  
PLW2 19.95299911 W  
PLW12 0.39528000 W  
PLW13 0.25297999 W

F2 - Processing parameters  
SI 32768  
SF 125.7576771 MHz  
WDW EM  
SSB 0  
LB 1.00 Hz  
GB 0  
PC 1.40

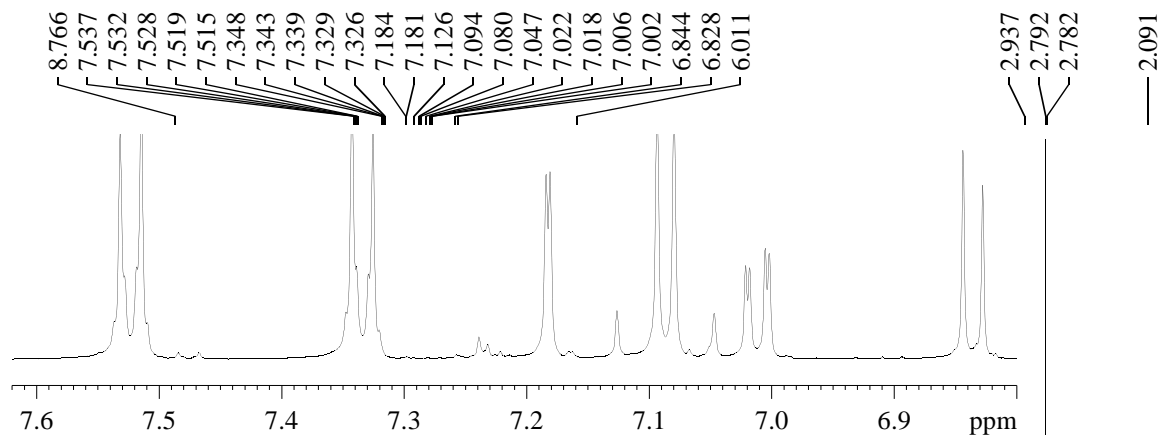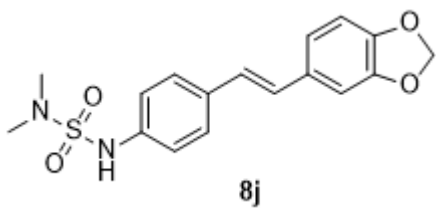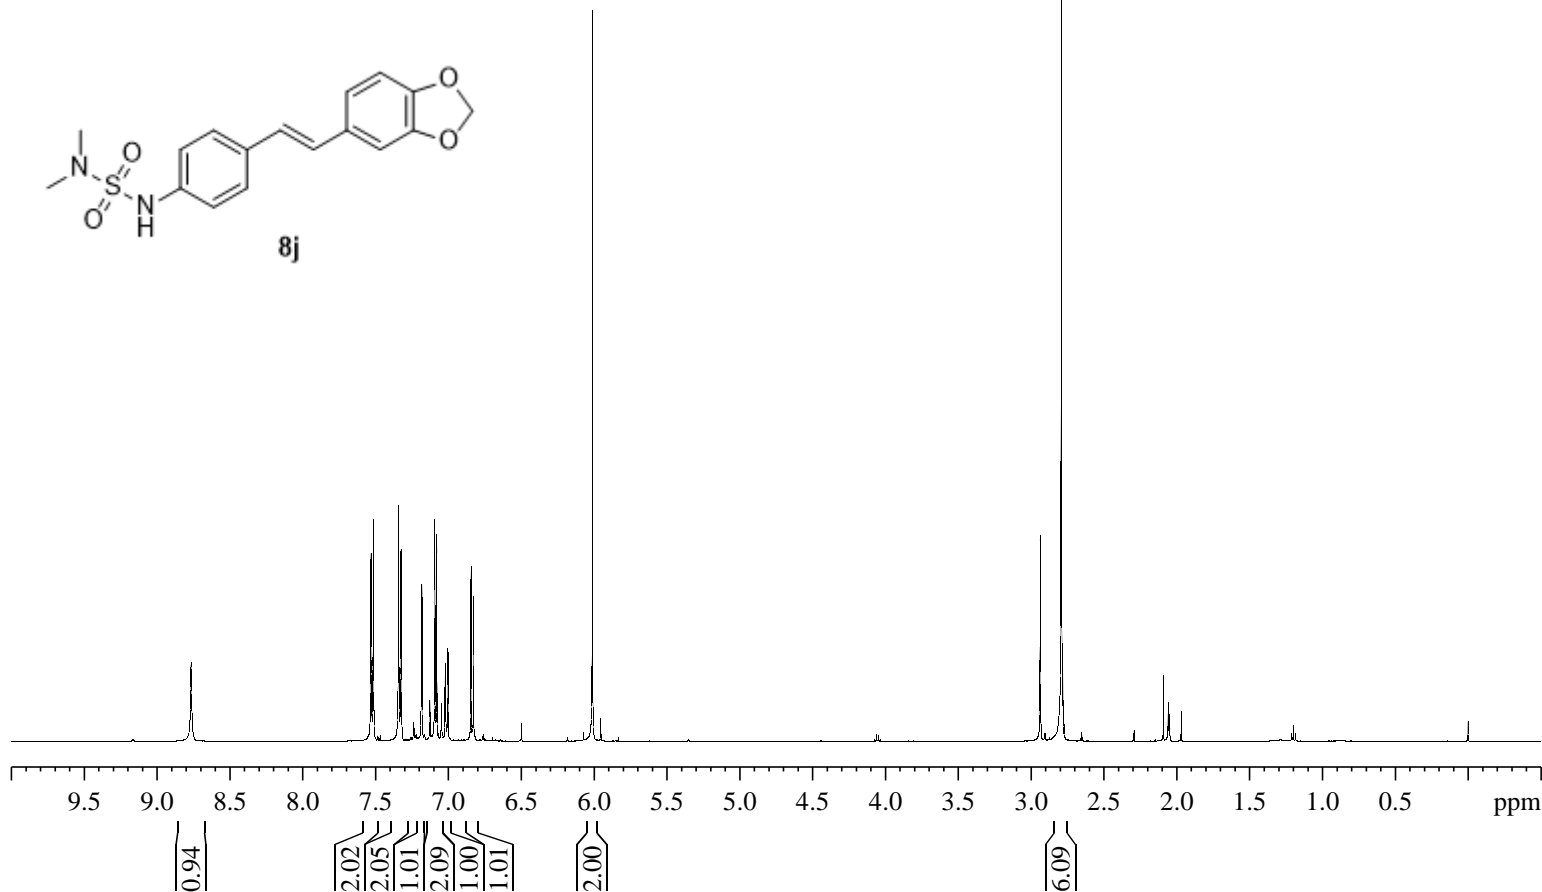

Current Data Parameters  
 NAME NMR15120810-LSS-17  
 EXPNO 2  
 PROCNO 1

F2 - Acquisition Parameters  
 Date\_ 20151222  
 Time 6.34  
 INSTRUM spect  
 PROBHD 5 mm PABBO BB-  
 PULPROG zg30  
 TD 65536  
 SOLVENT Acetone  
 NS 128  
 DS 2  
 SWH 10000.000 Hz  
 FIDRES 0.152588 Hz  
 AQ 3.2767999 sec  
 RG 62.41  
 DW 50.000 usec  
 DE 6.50 usec  
 TE -18.1 K  
 D1 1.00000000 sec  
 TD0 1

===== CHANNEL f1 =====  
 SFO1 500.1330885 MHz  
 NUC1 1H  
 P1 11.26 usec  
 PLW1 19.95299911 W

F2 - Processing parameters  
 SI 65536  
 SF 500.1300062 MHz  
 WDW EM  
 SSB 0  
 LB 0.30 Hz  
 GB 0  
 PC 1.00

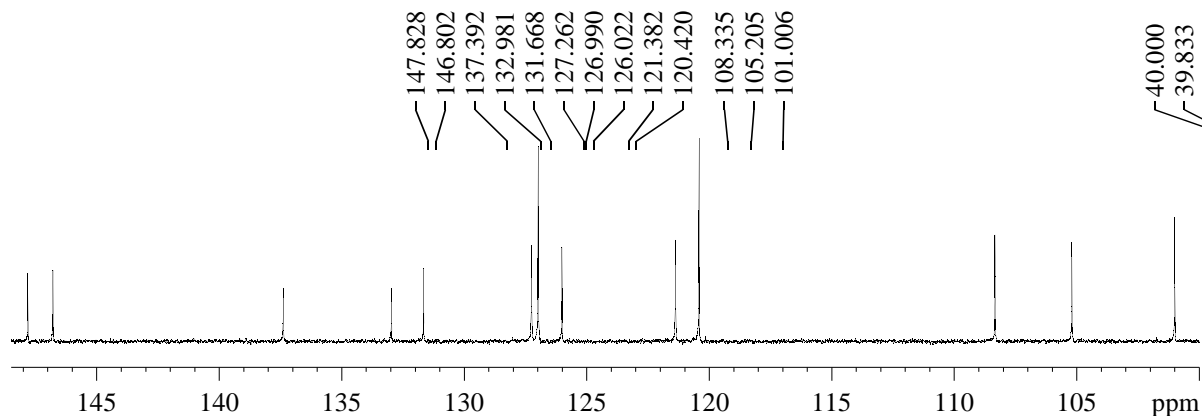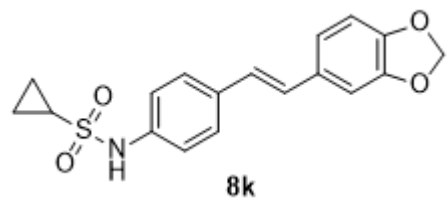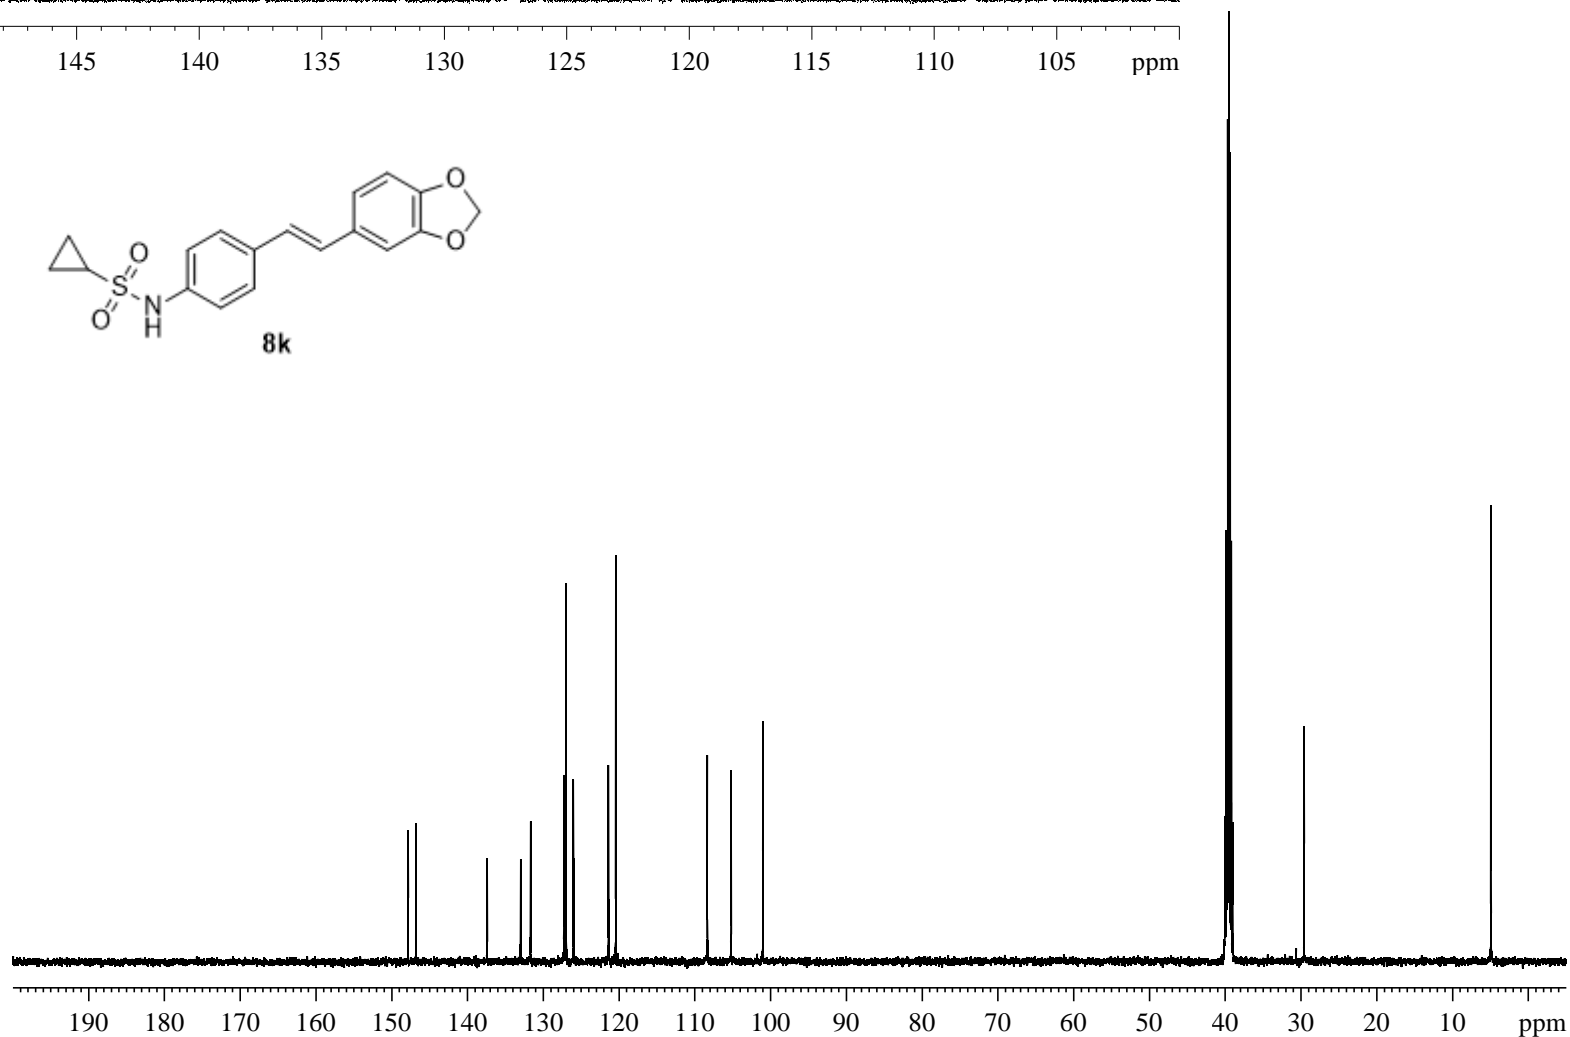

Current Data Parameters  
NAME NMR15110717-LSS-13  
EXPNO 2  
PROCNO 1

F2 - Acquisition Parameters  
Date\_ 20151123  
Time 9.04  
INSTRUM spect  
PROBHD 5 mm PABBO BB-  
PULPROG zgpg30  
TD 65536  
SOLVENT DMSO  
NS 256  
DS 4  
SWH 34722.223 Hz  
FIDRES 0.529819 Hz  
AQ 0.9437184 sec  
RG 198.55  
DW 14.400 usec  
DE 6.50 usec  
TE 303.2 K  
D1 2.00000000 sec  
D11 0.03000000 sec  
TD0 1

===== CHANNEL f1 =====  
SFO1 125.7703637 MHz  
NUC1 13C  
P1 8.99 usec  
PLW1 125.88999939 W

===== CHANNEL f2 =====  
SFO2 500.1320005 MHz  
NUC2 1H  
CPDPRG[2] waltz16  
PCPD2 80.00 usec  
PLW2 19.95299911 W  
PLW12 0.39528000 W  
PLW13 0.25297999 W

F2 - Processing parameters  
SI 32768  
SF 125.7578538 MHz  
WDW EM  
SSB 0  
LB 1.00 Hz  
GB 0  
PC 1.40

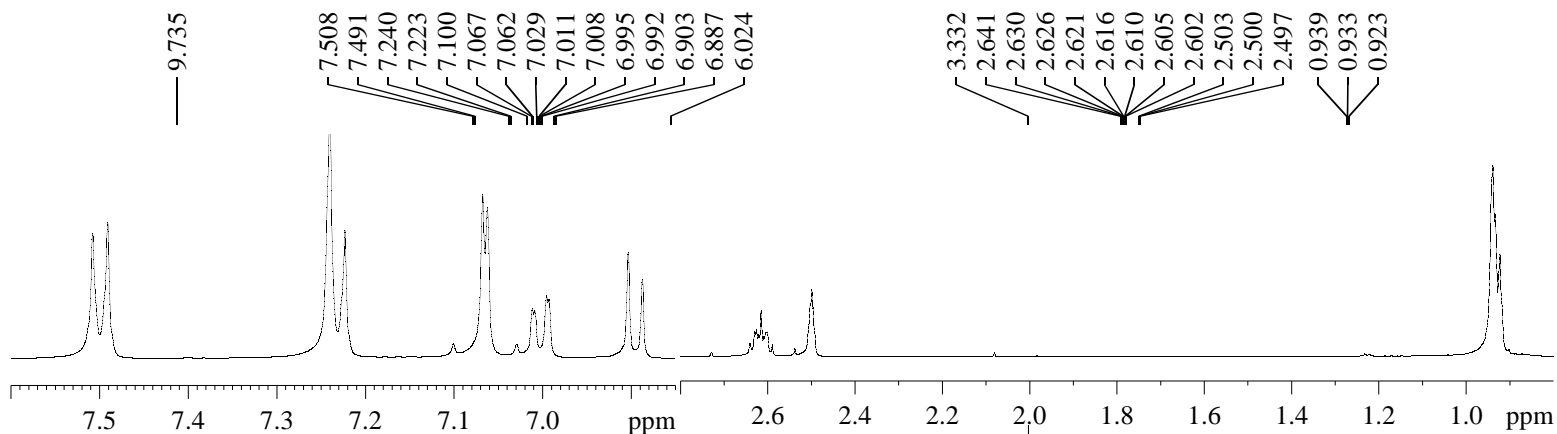

Current Data Parameters  
 NAME NMR15110717-LSS-13  
 EXPNO 1  
 PROCNO 1

F2 - Acquisition Parameters  
 Date\_ 20151120  
 Time 12.09  
 INSTRUM spect  
 PROBHD 5 mm PABBO BB-  
 PULPROG zg30  
 TD 65536  
 SOLVENT DMSO  
 NS 128  
 DS 2  
 SWH 10000.000 Hz  
 FIDRES 0.152588 Hz  
 AQ 3.2767999 sec  
 RG 80.16  
 DW 50.000 usec  
 DE 6.50 usec  
 TE 303.2 K  
 D1 1.00000000 sec  
 TD0 1

===== CHANNEL f1 =====  
 SFO1 500.1330885 MHz  
 NUC1 1H  
 P1 11.26 usec  
 PLW1 19.95299911 W

F2 - Processing parameters  
 SI 65536  
 SF 500.1300044 MHz  
 WDW EM  
 SSB 0  
 LB 0.30 Hz  
 GB 0  
 PC 1.00

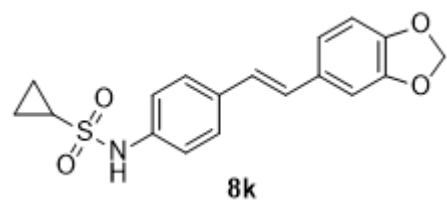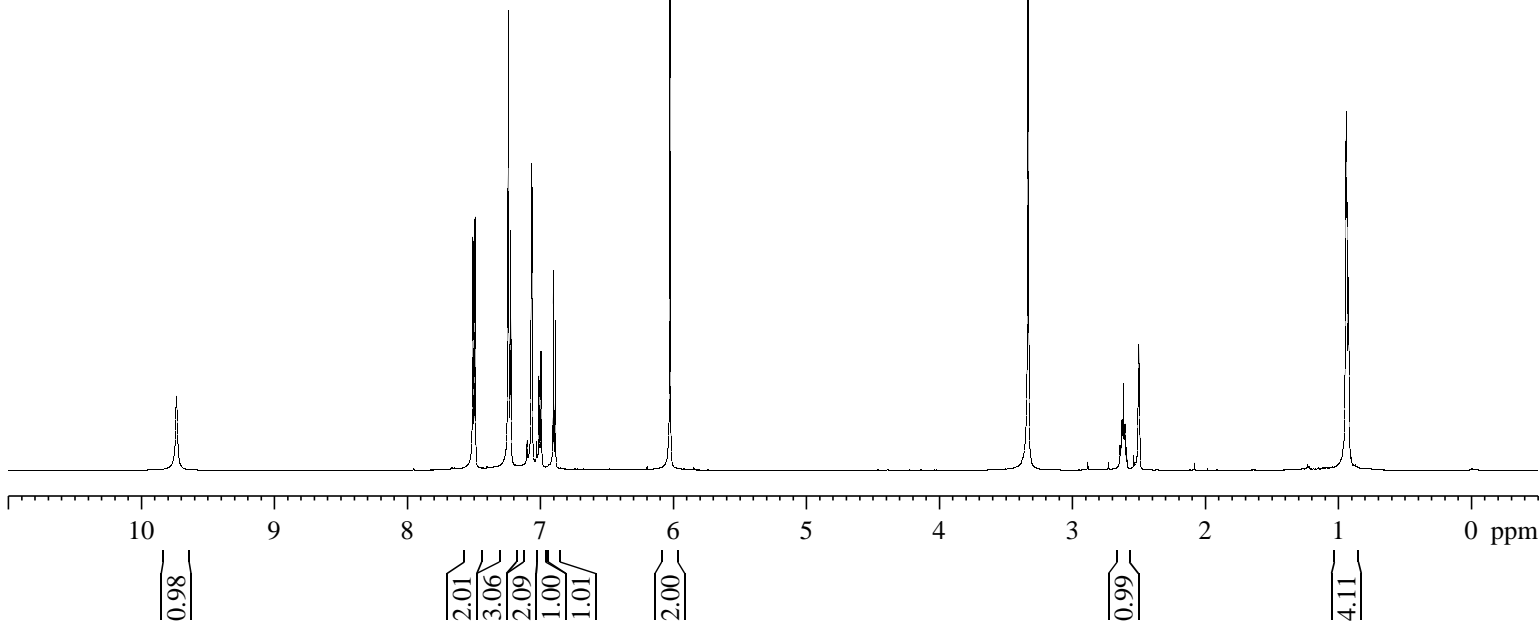



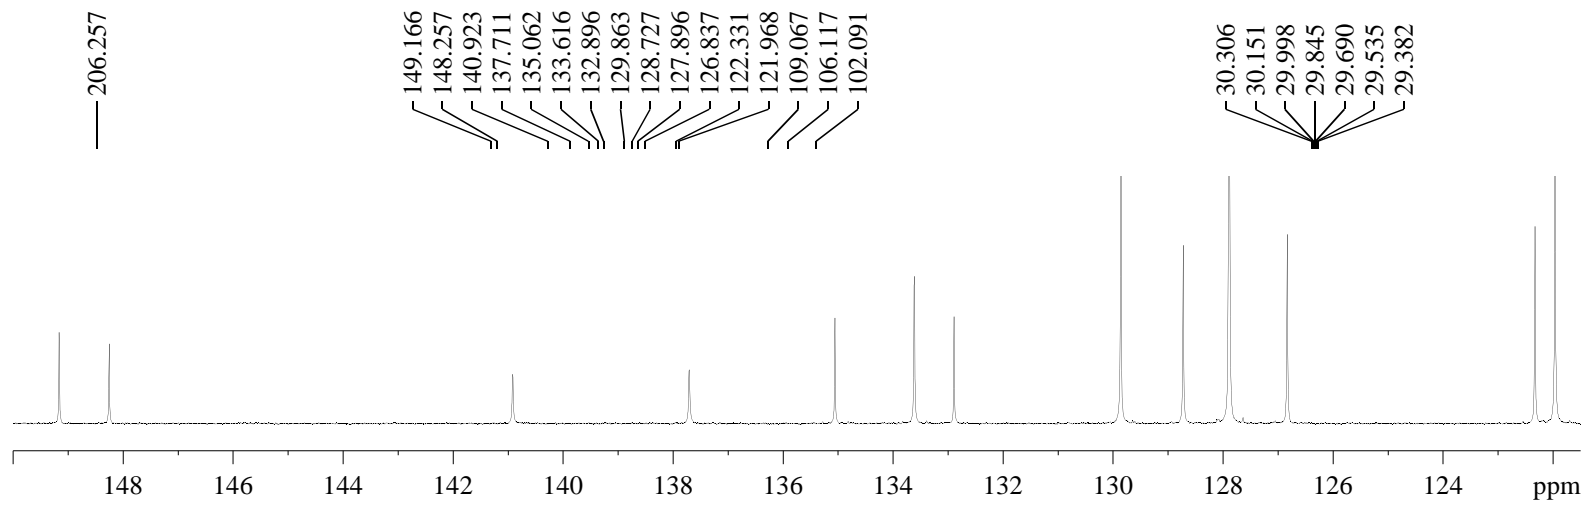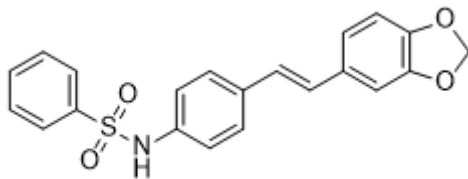

8l

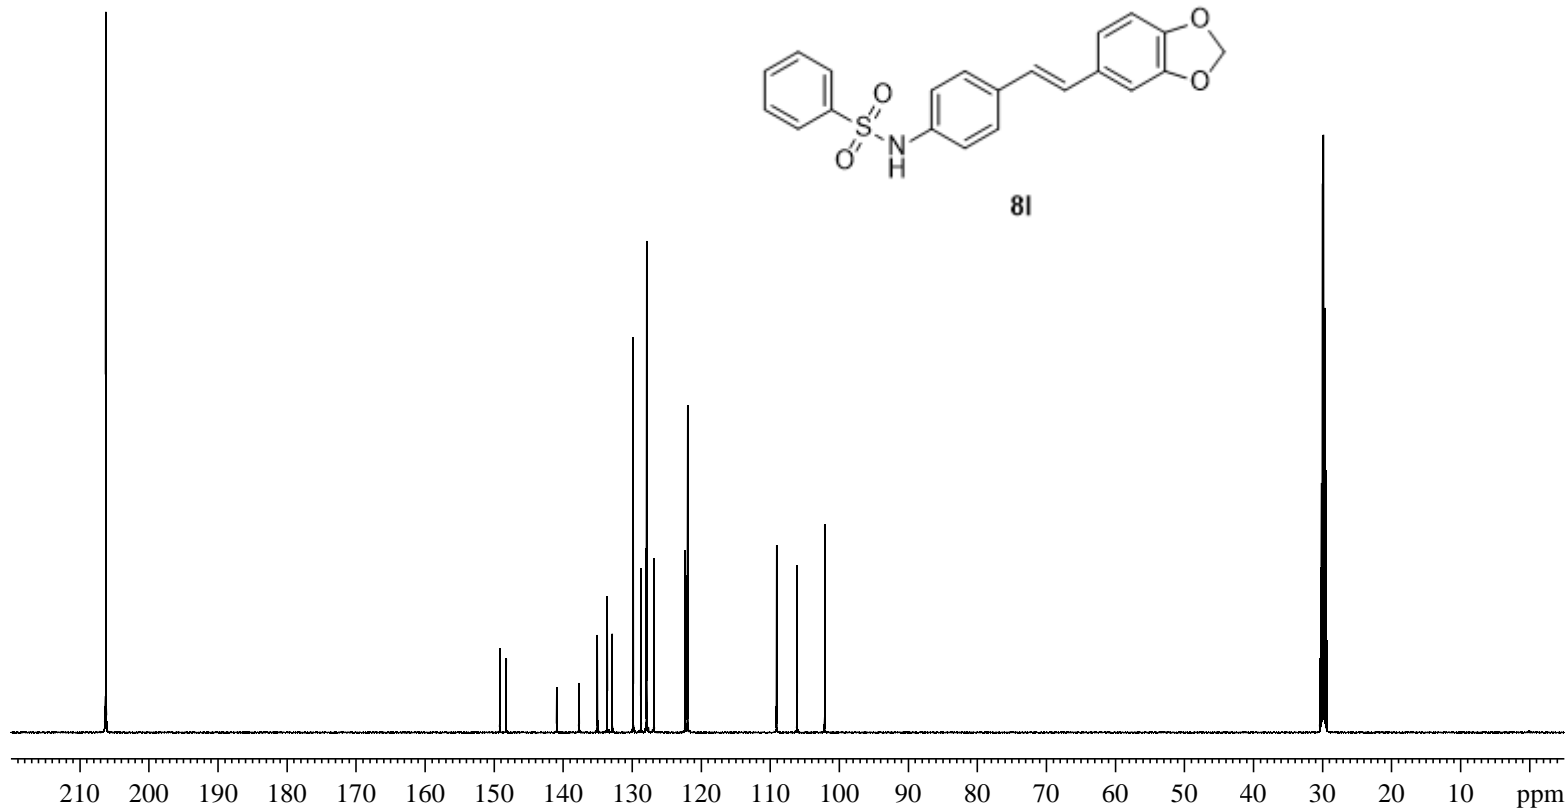

Current Data Parameters  
 NAME NMR15110068-Iss-12  
 EXPNO 2  
 PROCNO 1

F2 - Acquisition Parameters  
 Date\_ 20151110  
 Time 1.19  
 INSTRUM spect  
 PROBHD 5 mm PABBO BB-  
 PULPROG zgpg30  
 TD 65536  
 SOLVENT Acetone  
 NS 1200  
 DS 4  
 SWH 34722.223 Hz  
 FIDRES 0.529819 Hz  
 AQ 0.9437184 sec  
 RG 198.55  
 DW 14.400 usec  
 DE 6.50 usec  
 TE 303.1 K  
 D1 2.00000000 sec  
 D11 0.03000000 sec  
 TD0 1

===== CHANNEL f1 =====  
 SFO1 125.7703637 MHz  
 NUC1 13C  
 P1 8.99 usec  
 PLW1 125.88999939 W

===== CHANNEL f2 =====  
 SFO2 500.1320005 MHz  
 NUC2 1H  
 CPDPRG[2] waltz16  
 PCPD2 80.00 usec  
 PLW2 19.95299911 W  
 PLW12 0.39528000 W  
 PLW13 0.25297999 W

F2 - Processing parameters  
 SI 32768  
 SF 125.7576824 MHz  
 WDW EM  
 SSB 0  
 LB 1.00 Hz  
 GB 0  
 PC 1.40

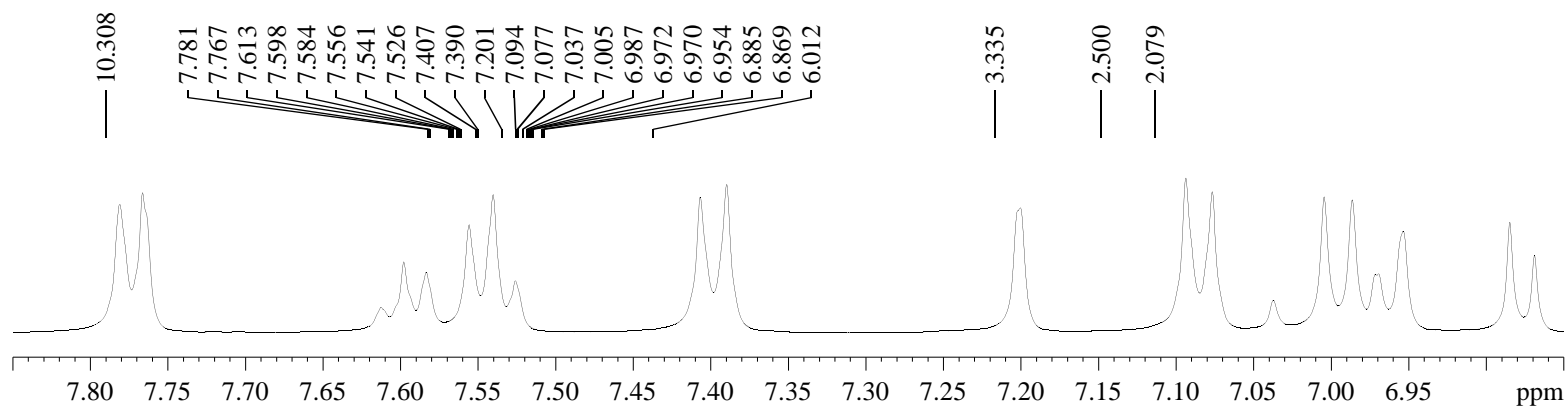

Current Data Parameters  
 NAME NMR15110068-lss-12  
 EXPNO 10  
 PROCNO 1

F2 - Acquisition Parameters  
 Date\_ 20151116  
 Time 10.25  
 INSTRUM spect  
 PROBHD 5 mm PABBO BB-  
 PULPROG zg30  
 TD 65536  
 SOLVENT DMSO  
 NS 64  
 DS 2  
 SWH 10000.000 Hz  
 FIDRES 0.152588 Hz  
 AQ 3.2767999 sec  
 RG 90.46  
 DW 50.000 usec  
 DE 6.50 usec  
 TE 303.1 K  
 D1 1.00000000 sec  
 TD0 1

===== CHANNEL f1 =====  
 SFO1 500.1330885 MHz  
 NUC1 1H  
 P1 11.26 usec  
 PLW1 19.95299911 W

F2 - Processing parameters  
 SI 65536  
 SF 500.1300047 MHz  
 WDW EM  
 SSB 0  
 LB 0.10 Hz  
 GB 0  
 PC 1.00

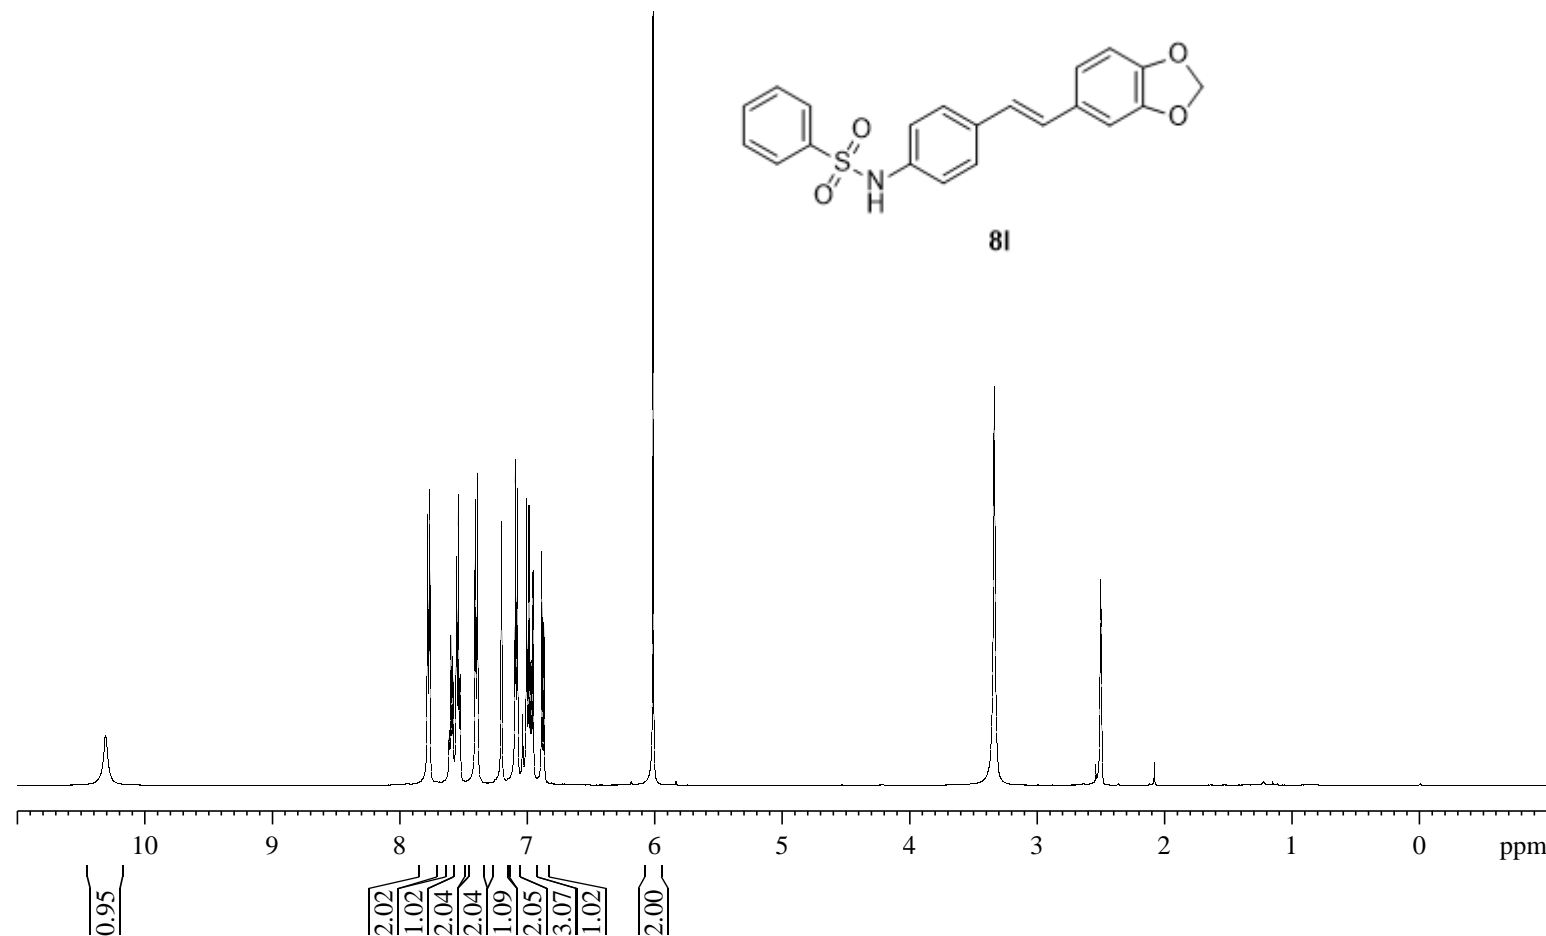

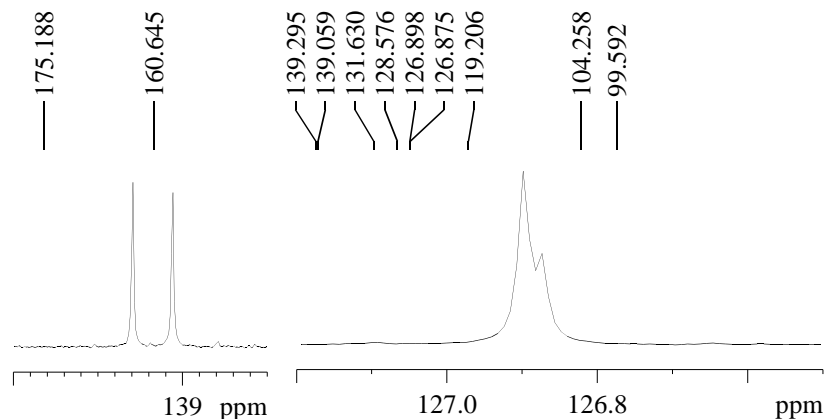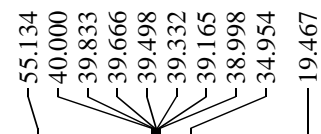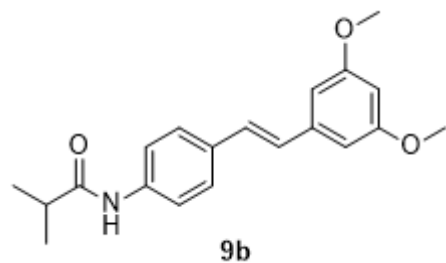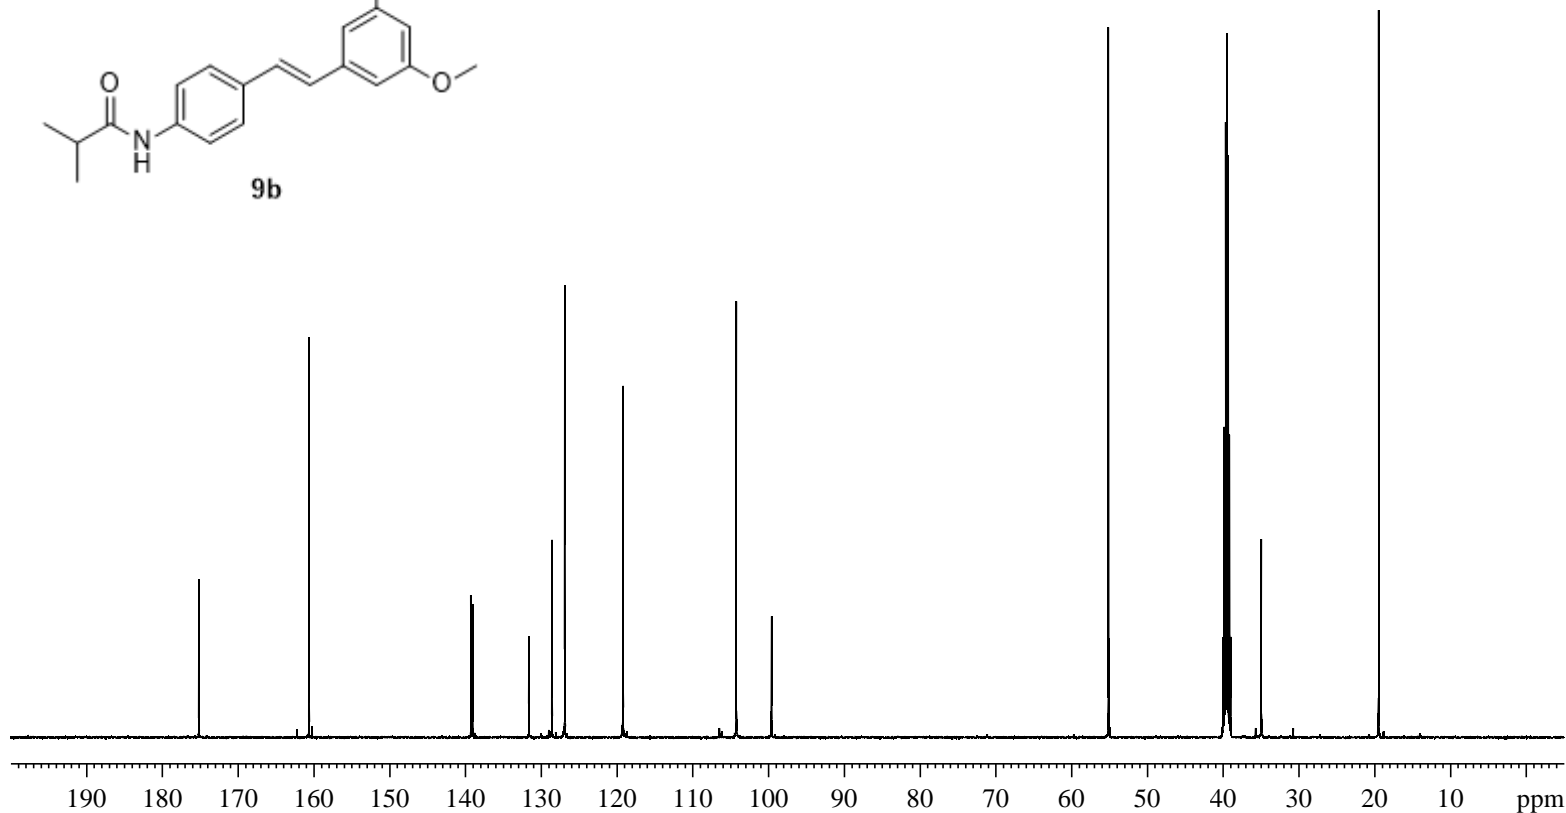

Current Data Parameters  
 NAME NMR16020154-LSS-21  
 EXPNO 20  
 PROCNO 1

F2 - Acquisition Parameters  
 Date\_ 20160227  
 Time 4.31  
 INSTRUM spect  
 PROBHD 5 mm PABBO BB-  
 PULPROG zgpg30  
 TD 65536  
 SOLVENT DMSO  
 NS 1024  
 DS 4  
 SWH 34722.223 Hz  
 FIDRES 0.529819 Hz  
 AQ 0.9437184 sec  
 RG 198.55  
 DW 14.400 usec  
 DE 6.50 usec  
 TE 298.1 K  
 D1 2.00000000 sec  
 D11 0.03000000 sec  
 TD0 1

===== CHANNEL f1 =====  
 SFO1 125.7703637 MHz  
 NUC1 13C  
 P1 8.99 usec  
 PLW1 125.88999939 W

===== CHANNEL f2 =====  
 SFO2 500.1320005 MHz  
 NUC2 1H  
 CPDPRG[2] waltz16  
 PCPD2 80.00 usec  
 PLW2 19.95299911 W  
 PLW12 0.39528000 W  
 PLW13 0.25297999 W

F2 - Processing parameters  
 SI 32768  
 SF 125.7578506 MHz  
 WDW EM  
 SSB 0  
 LB 1.00 Hz  
 GB 0  
 PC 1.40

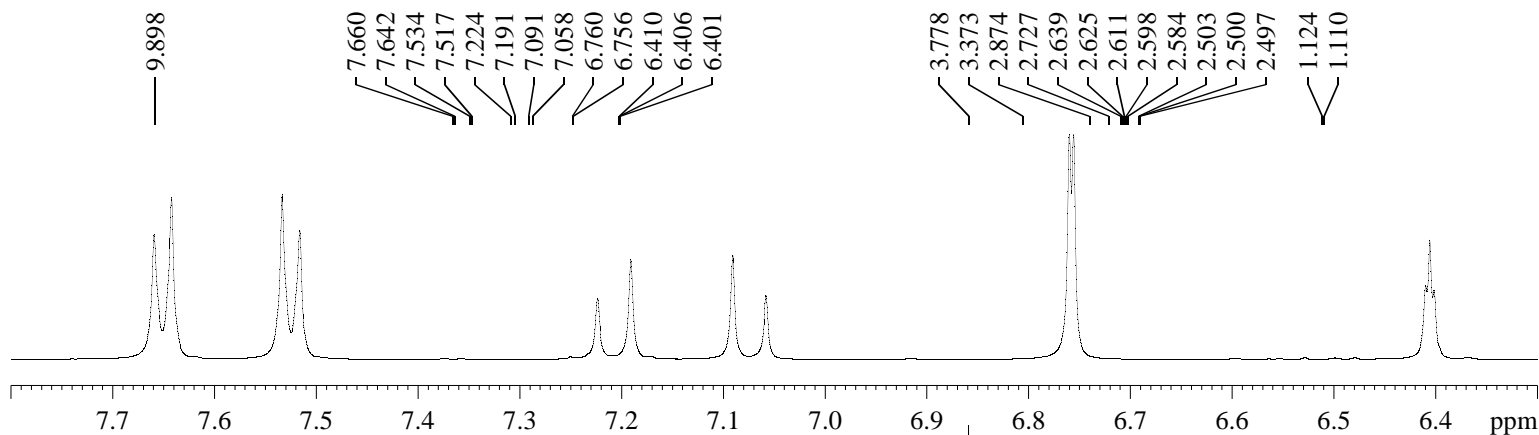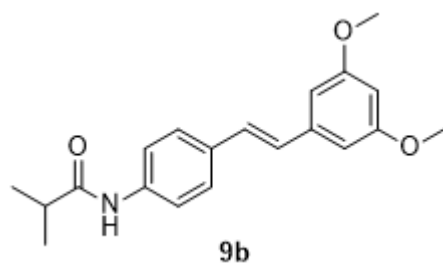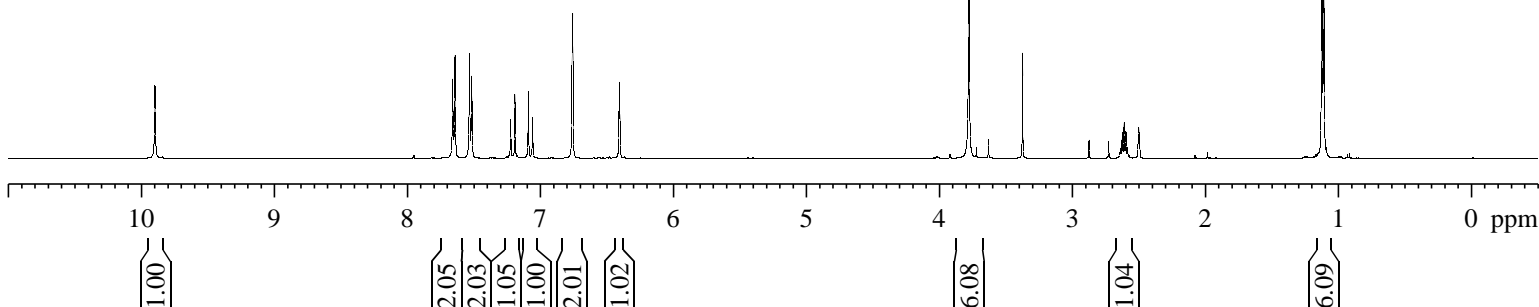

Current Data Parameters  
 NAME NMR16020154-LSS-21  
 EXPNO 10  
 PROCNO 1

F2 - Acquisition Parameters  
 Date\_ 20160225  
 Time 11.51  
 INSTRUM spect  
 PROBHD 5 mm PABBO BB-  
 PULPROG zg30  
 TD 65536  
 SOLVENT DMSO  
 NS 128  
 DS 2  
 SWH 10000.000 Hz  
 FIDRES 0.152588 Hz  
 AQ 3.2767999 sec  
 RG 32.04  
 DW 50.000 usec  
 DE 6.50 usec  
 TE 298.1 K  
 D1 1.00000000 sec  
 TD0 1

===== CHANNEL f1 =====  
 SFO1 500.1330885 MHz  
 NUC1 <sup>1</sup>H  
 P1 11.26 usec  
 PLW1 19.95299911 W

F2 - Processing parameters  
 SI 65536  
 SF 500.1300038 MHz  
 WDW EM  
 SSB 0  
 LB 0.30 Hz  
 GB 0  
 PC 1.00

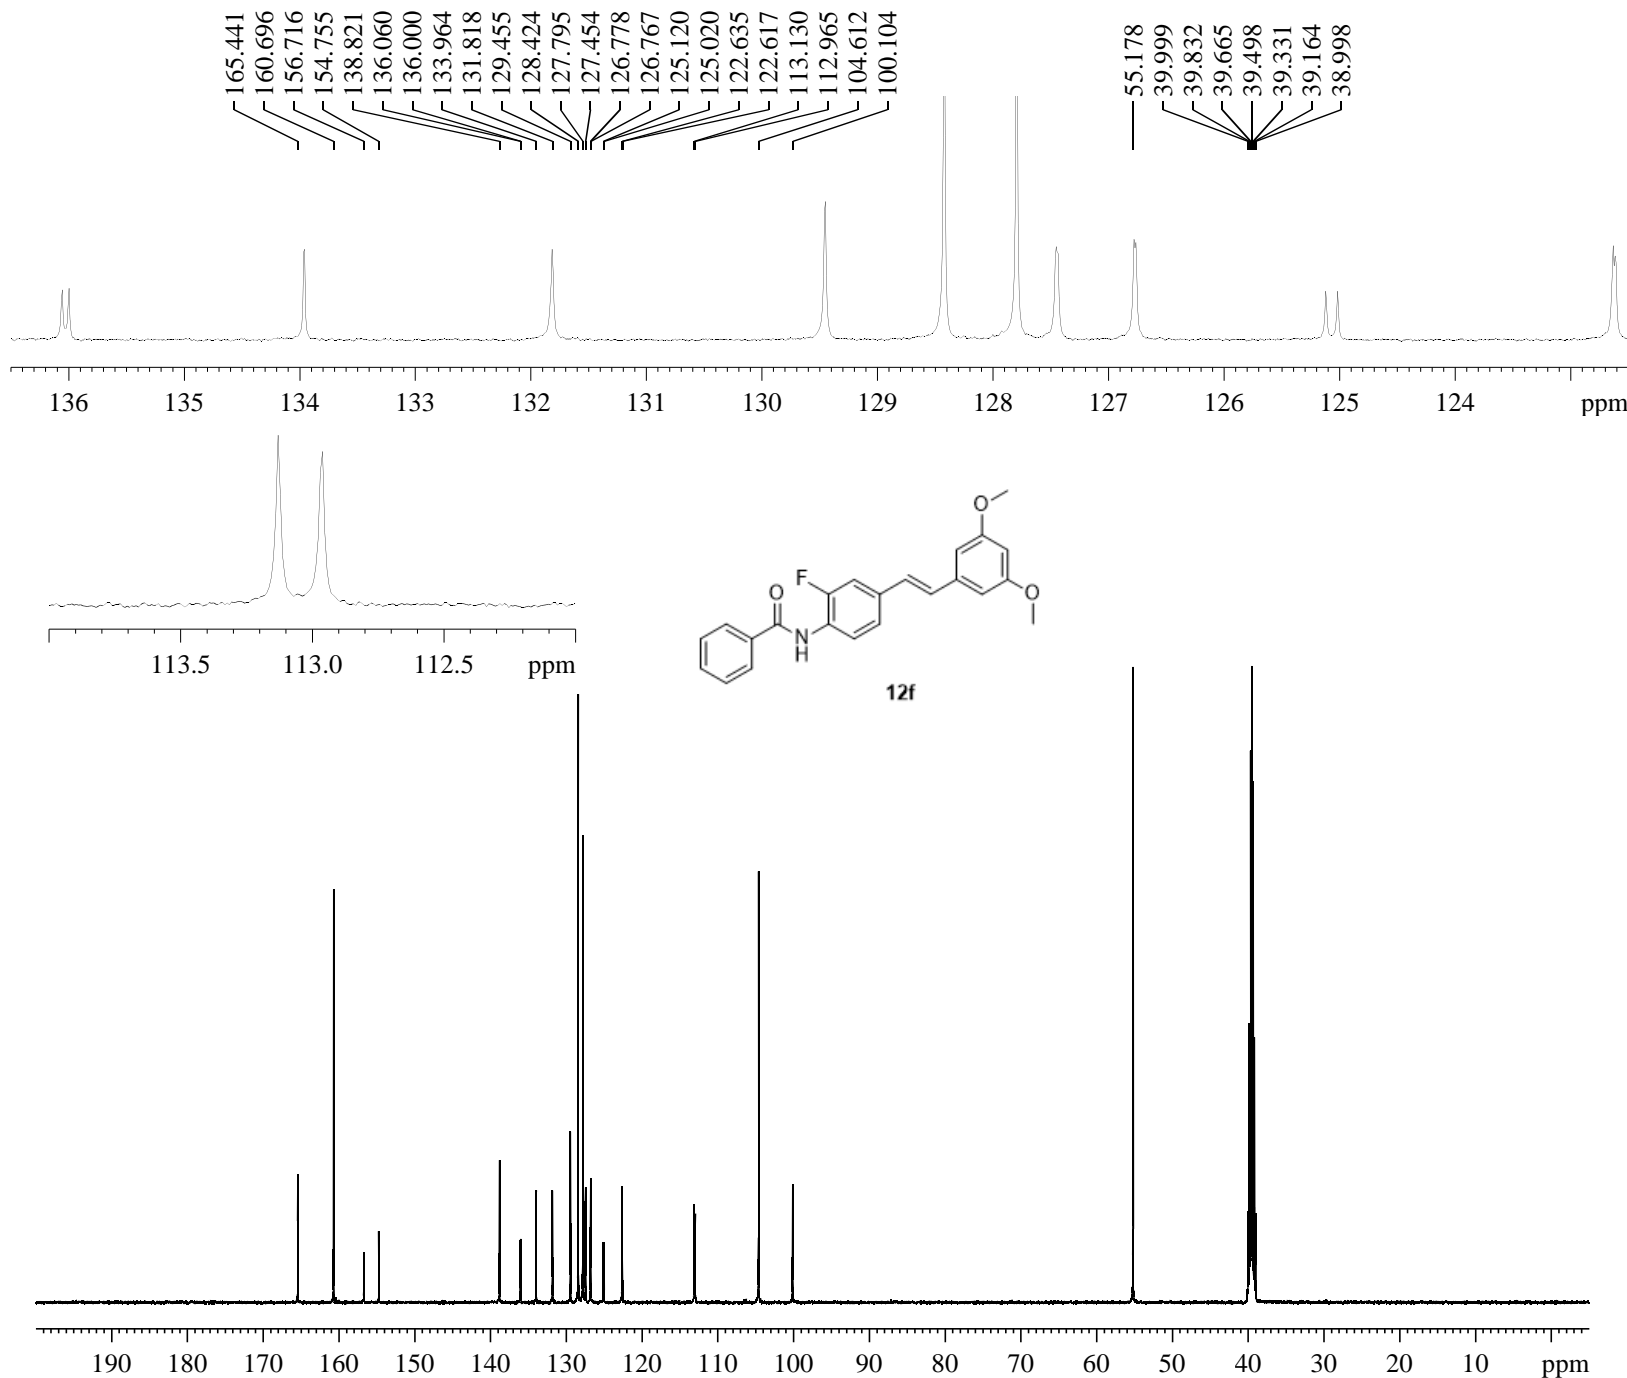

Current Data Parameters  
 NAME NMR16031134-LSS-31  
 EXPNO 2  
 PROCNO 1

F2 - Acquisition Parameters  
 Date\_ 20160330  
 Time 8.15  
 INSTRUM spect  
 PROBHD 5 mm PABBO BB-  
 PULPROG zgpg30  
 TD 65536  
 SOLVENT DMSO  
 NS 600  
 DS 4  
 SWH 34722.223 Hz  
 FIDRES 0.529819 Hz  
 AQ 0.9437184 sec  
 RG 198.55  
 DW 14.400 usec  
 DE 6.50 usec  
 TE 298.2 K  
 D1 2.00000000 sec  
 D11 0.03000000 sec  
 TD0 1

===== CHANNEL f1 =====  
 SFO1 125.7703637 MHz  
 NUC1 13C  
 P1 8.99 usec  
 PLW1 125.88999939 W

===== CHANNEL f2 =====  
 SFO2 500.1320005 MHz  
 NUC2 1H  
 CPDPRG[2] waltz16  
 PCPD2 80.00 usec  
 PLW2 19.95299911 W  
 PLW12 0.39528000 W  
 PLW13 0.25297999 W

F2 - Processing parameters  
 SI 32768  
 SF 125.7578496 MHz  
 WDW EM  
 SSB 0  
 LB 1.00 Hz  
 GB 0  
 PC 1.40

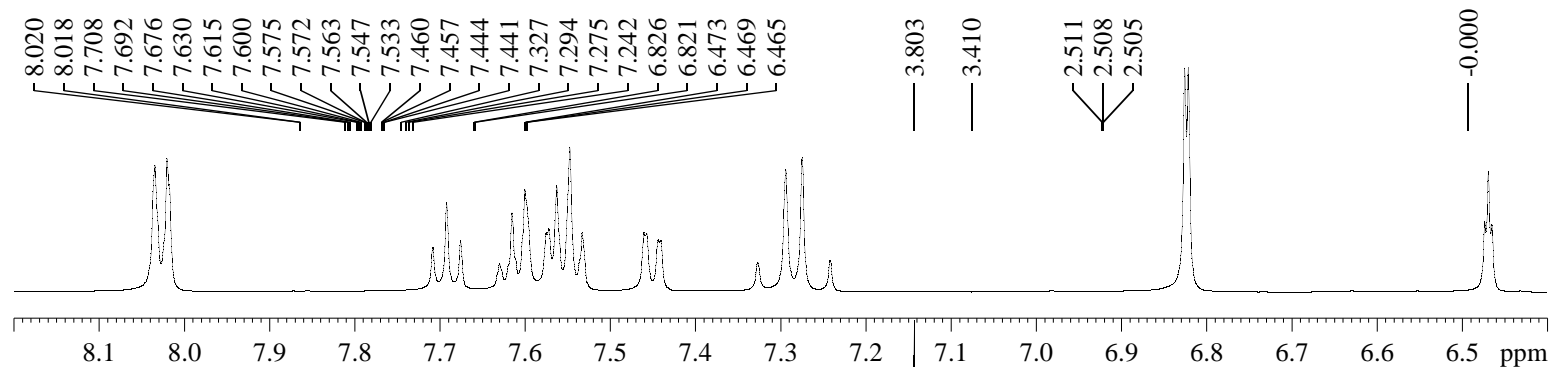

Current Data Parameters  
 NAME NMR16031134-LSS-31  
 EXPNO 1  
 PROCNO 1

F2 - Acquisition Parameters  
 Date\_ 20160328  
 Time 11.47  
 INSTRUM spect  
 PROBHD 5 mm PABBO BB-  
 PULPROG zg30  
 TD 65536  
 SOLVENT DMSO  
 NS 64  
 DS 2  
 SWH 10000.000 Hz  
 FIDRES 0.152588 Hz  
 AQ 3.2767999 sec  
 RG 32.04  
 DW 50.000 usec  
 DE 6.50 usec  
 TE 298.1 K  
 D1 1.00000000 sec  
 TD0 1

===== CHANNEL f1 =====  
 SFO1 500.1330885 MHz  
 NUC1 1H  
 P1 11.26 usec  
 PLW1 19.95299911 W

F2 - Processing parameters  
 SI 65536  
 SF 500.1300004 MHz  
 WDW EM  
 SSB 0  
 LB 0.30 Hz  
 GB 0  
 PC 1.00

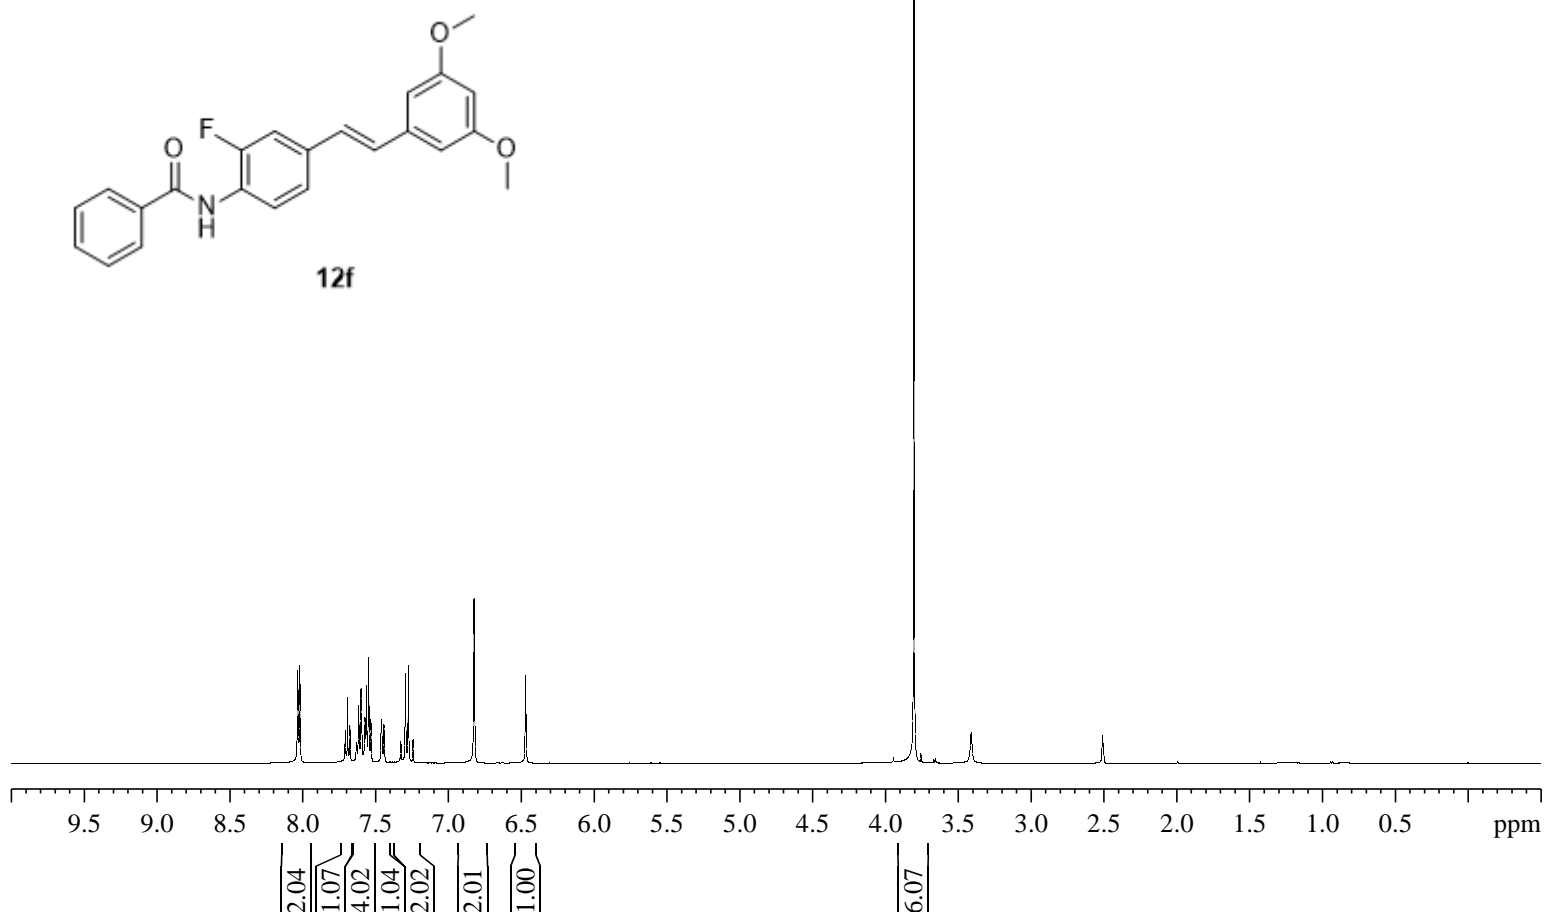

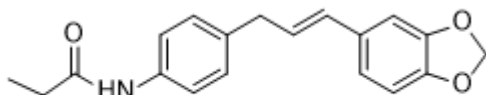

**18b**

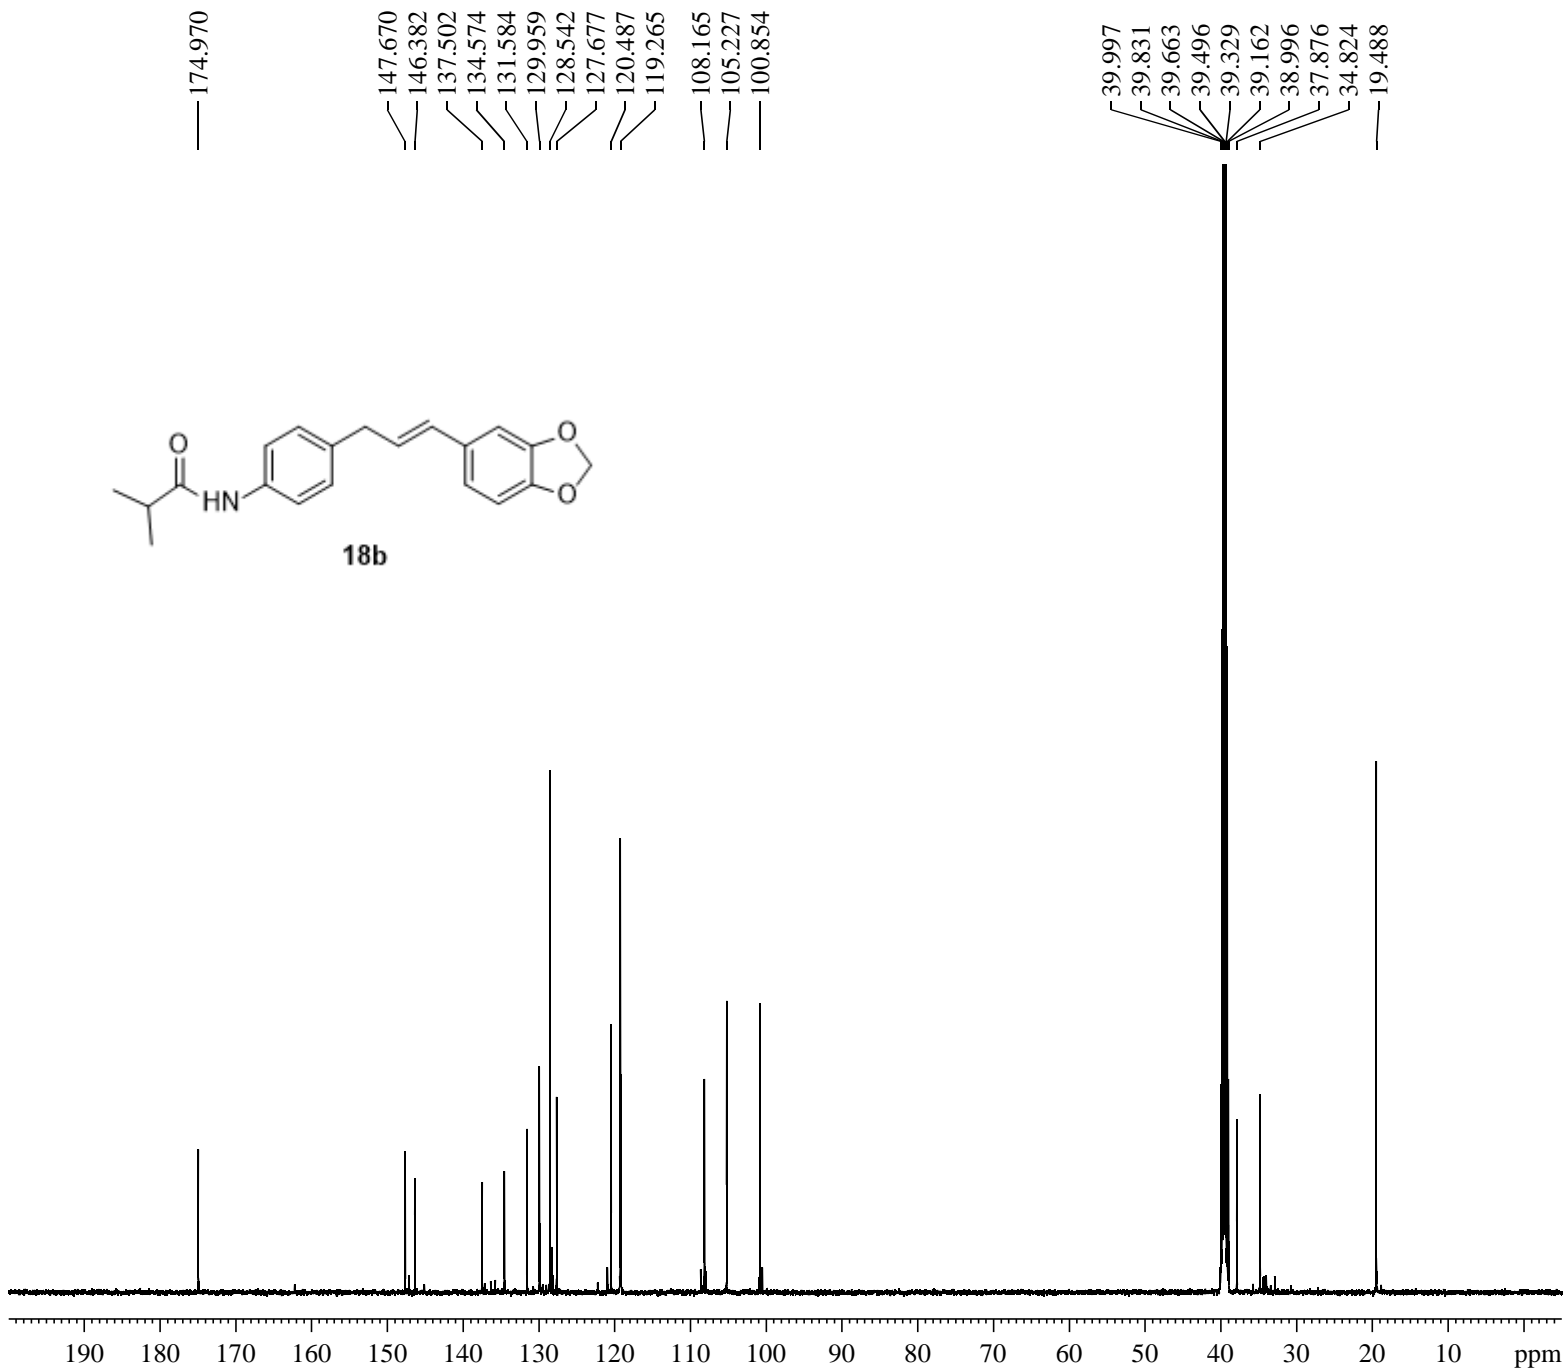

Current Data Parameters  
 NAME NMR16020155-LSS-22  
 EXPNO 20  
 PROCNO 1

F2 - Acquisition Parameters  
 Date\_ 20160227  
 Time 5.26  
 INSTRUM spect  
 PROBHD 5 mm PABBO BB-  
 PULPROG zgpg30  
 TD 65536  
 SOLVENT DMSO  
 NS 1024  
 DS 4  
 SWH 34722.223 Hz  
 FIDRES 0.529819 Hz  
 AQ 0.9437184 sec  
 RG 198.55  
 DW 14.400 usec  
 DE 6.50 usec  
 TE 298.1 K  
 D1 2.00000000 sec  
 D11 0.03000000 sec  
 TD0 1

===== CHANNEL f1 =====  
 SFO1 125.7703637 MHz  
 NUC1 13C  
 P1 8.99 usec  
 PLW1 125.88999939 W

===== CHANNEL f2 =====  
 SFO2 500.1320005 MHz  
 NUC2 1H  
 CPDPRG[2] waltz16  
 PCPD2 80.00 usec  
 PLW2 19.95299911 W  
 PLW12 0.39528000 W  
 PLW13 0.25297999 W

F2 - Processing parameters  
 SI 32768  
 SF 125.7578517 MHz  
 WDW EM  
 SSB 0  
 LB 1.00 Hz  
 GB 0  
 PC 1.40

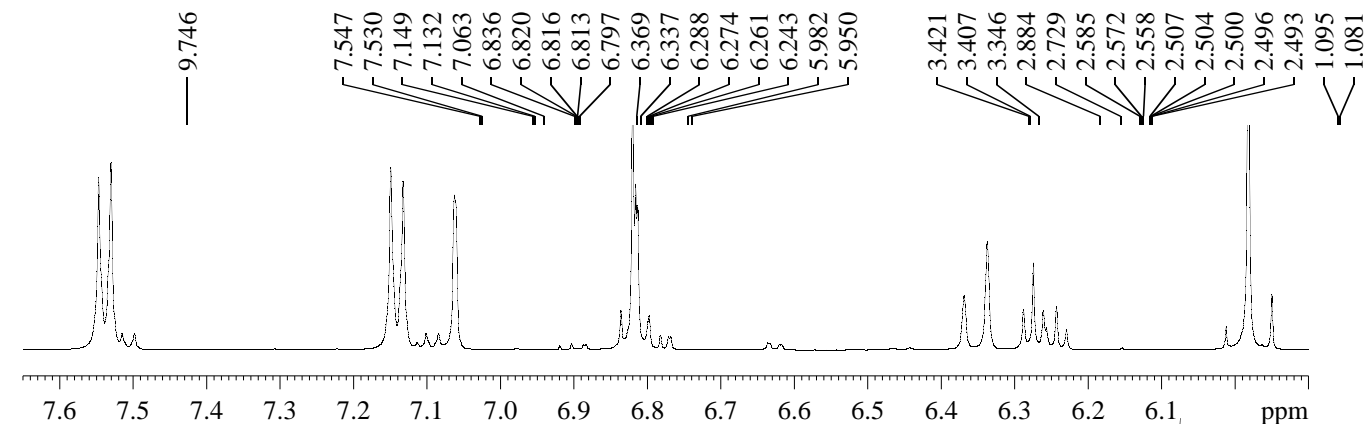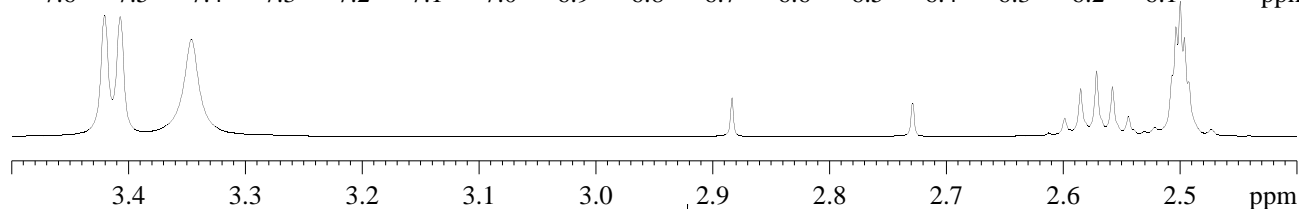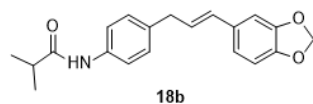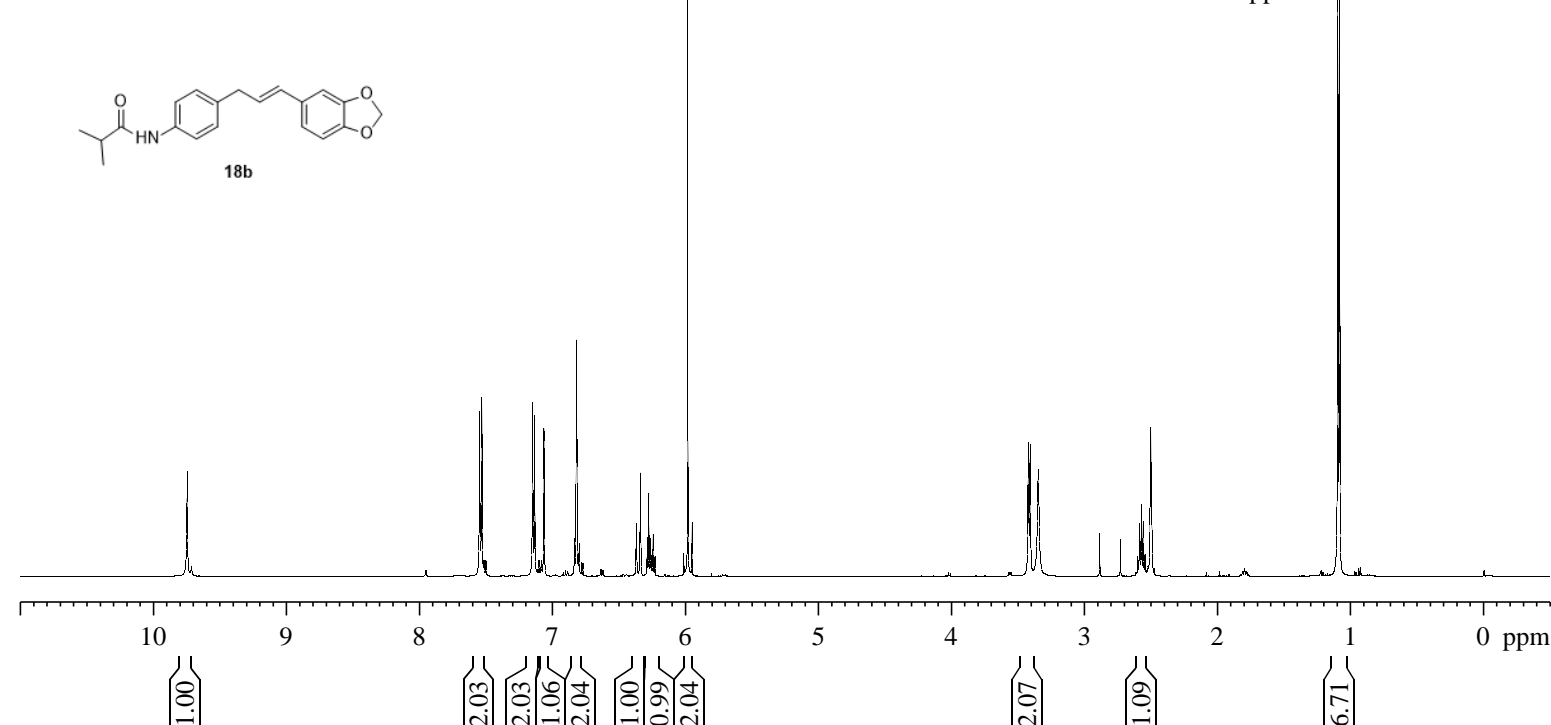

Current Data Parameters  
 NAME NMR16020155-LSS-22  
 EXPNO 10  
 PROCNO 1

F2 - Acquisition Parameters  
 Date\_ 20160225  
 Time 12.03  
 INSTRUM spect  
 PROBHD 5 mm PABBO BB-  
 PULPROG zg30  
 TD 65536  
 SOLVENT DMSO  
 NS 128  
 DS 2  
 SWH 10000.000 Hz  
 FIDRES 0.152588 Hz  
 AQ 3.2767999 sec  
 RG 80.16  
 DW 50.000 usec  
 DE 6.50 usec  
 TE 298.1 K  
 D1 1.00000000 sec  
 TD0 1

===== CHANNEL f1 =====  
 SFO1 500.1330885 MHz  
 NUC1 1H  
 P1 11.26 usec  
 PLW1 19.95299911 W

F2 - Processing parameters  
 SI 65536  
 SF 500.1300039 MHz  
 WDW EM  
 SSB 0  
 LB 0.30 Hz  
 GB 0  
 PC 1.00



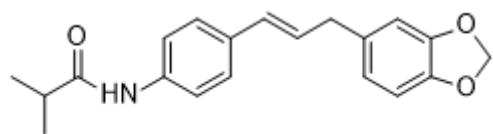

**23b**

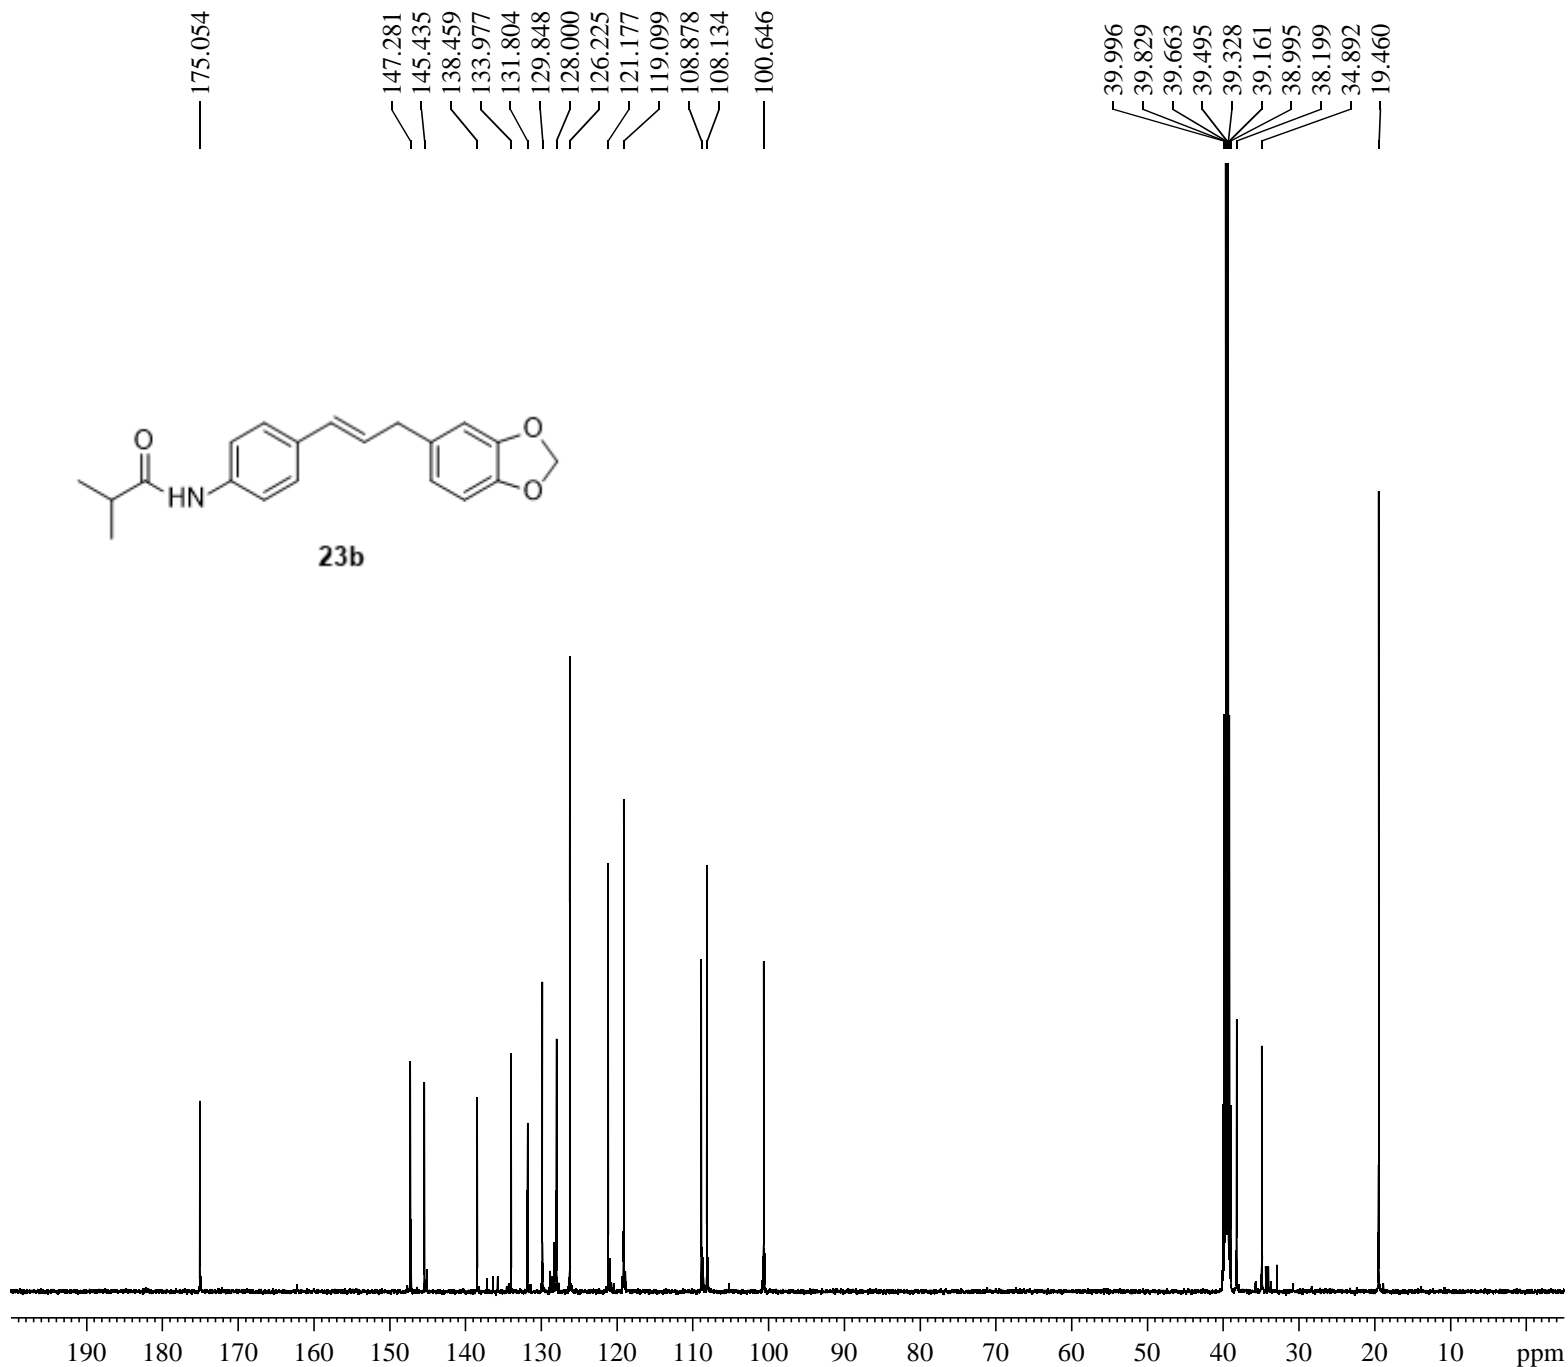

Current Data Parameters  
 NAME NMR16020156-LSS-23  
 EXPNO 10  
 PROCNO 1

F2 - Acquisition Parameters  
 Date\_ 20160227  
 Time 6.20  
 INSTRUM spect  
 PROBHD 5 mm PABBO BB-  
 PULPROG zgpg30  
 TD 65536  
 SOLVENT DMSO  
 NS 1024  
 DS 4  
 SWH 34722.223 Hz  
 FIDRES 0.529819 Hz  
 AQ 0.9437184 sec  
 RG 198.55  
 DW 14.400 usec  
 DE 6.50 usec  
 TE 298.2 K  
 D1 2.00000000 sec  
 D11 0.03000000 sec  
 TD0 1

===== CHANNEL f1 =====  
 SFO1 125.7703637 MHz  
 NUC1 13C  
 P1 8.99 usec  
 PLW1 125.88999939 W

===== CHANNEL f2 =====  
 SFO2 500.1320005 MHz  
 NUC2 1H  
 CPDPRG[2] waltz16  
 PCPD2 80.00 usec  
 PLW2 19.95299911 W  
 PLW12 0.39528000 W  
 PLW13 0.25297999 W

F2 - Processing parameters  
 SI 32768  
 SF 125.7578517 MHz  
 WDW EM  
 SSB 0  
 LB 1.00 Hz  
 GB 0  
 PC 1.40

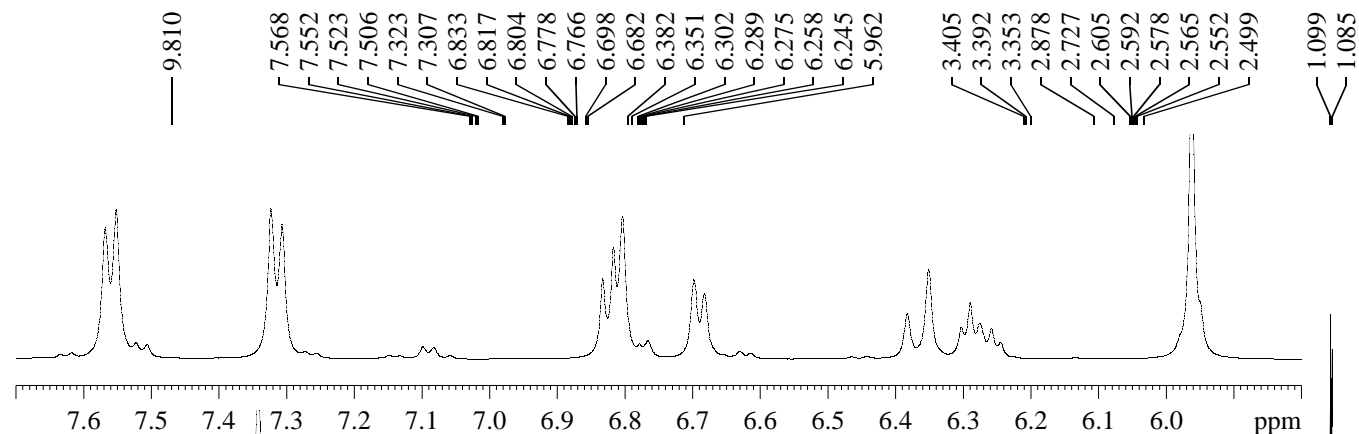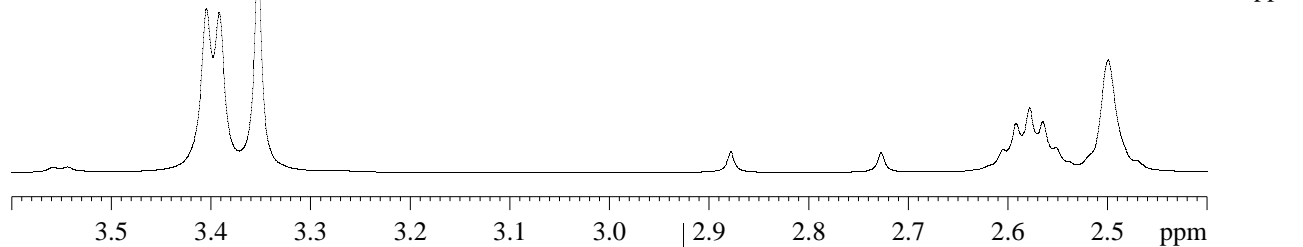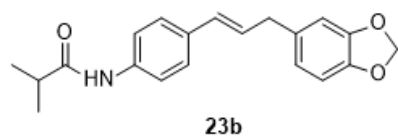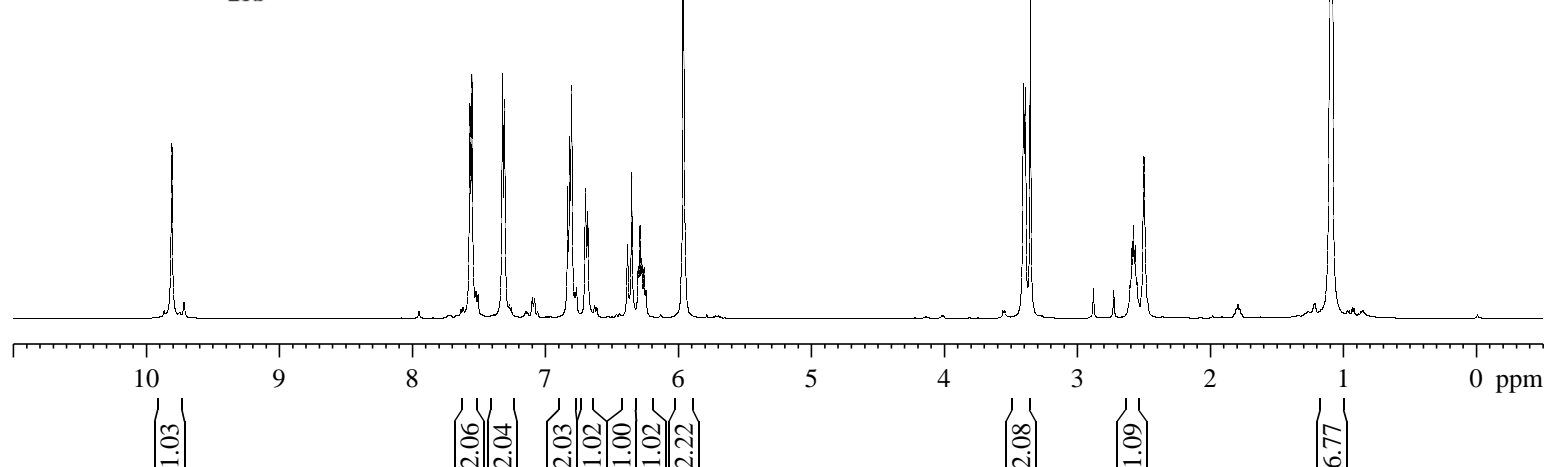

Current Data Parameters  
 NAME NMR16020156-LSS-23  
 EXPNO 20  
 PROCNO 1

F2 - Acquisition Parameters  
 Date\_ 20160225  
 Time 12.15  
 INSTRUM spect  
 PROBHD 5 mm PABBO BB-  
 PULPROG zg30  
 TD 65536  
 SOLVENT DMSO  
 NS 128  
 DS 2  
 SWH 10000.000 Hz  
 FIDRES 0.152588 Hz  
 AQ 3.2767999 sec  
 RG 56.83  
 DW 50.000 usec  
 DE 6.50 usec  
 TE 298.1 K  
 D1 1.00000000 sec  
 TD0 1

===== CHANNEL f1 =====  
 SFO1 500.1330885 MHz  
 NUC1 1H  
 P1 11.26 usec  
 PLW1 19.95299911 W

F2 - Processing parameters  
 SI 65536  
 SF 500.1300043 MHz  
 WDW EM  
 SSB 0  
 LB 0.30 Hz  
 GB 0  
 PC 1.00

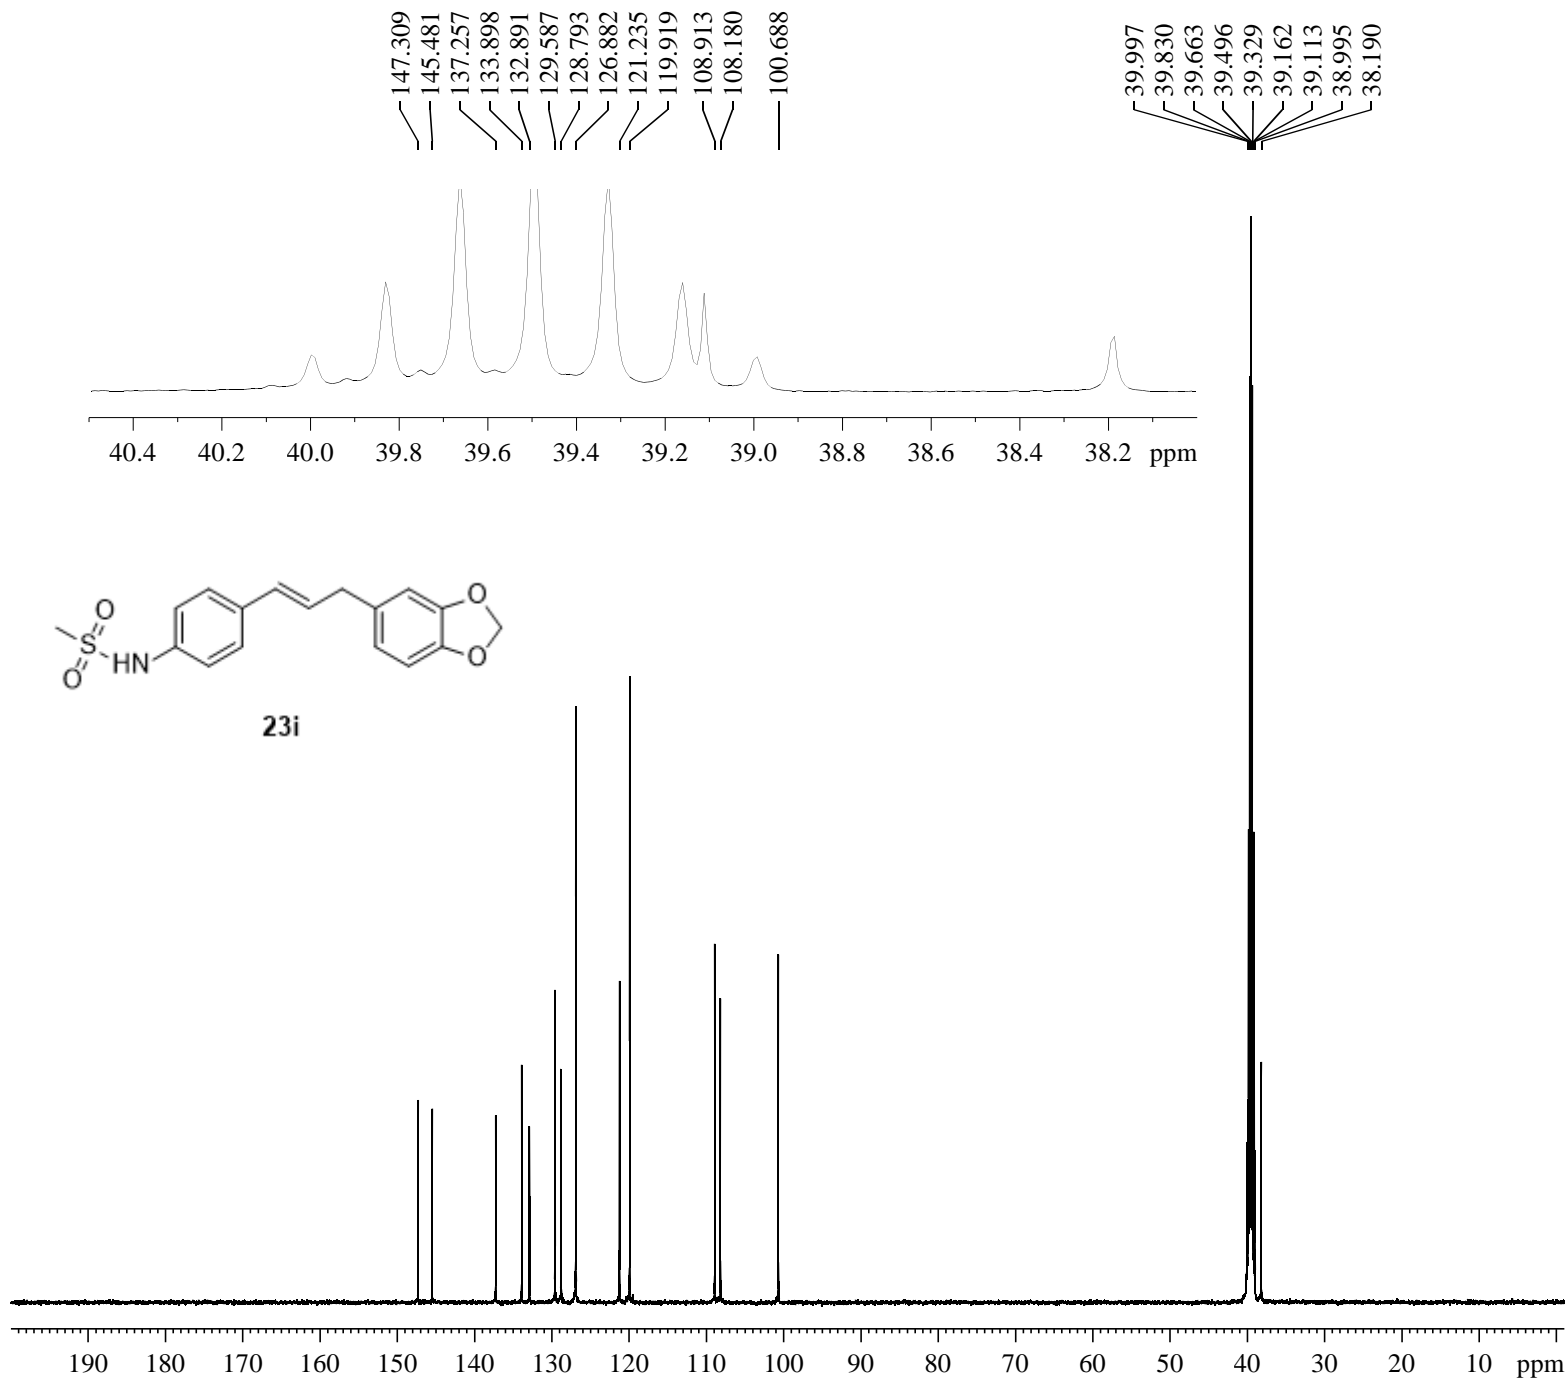

Current Data Parameters  
 NAME NMR16040130-LSS-32-C  
 EXPNO 1  
 PROCNO 1

F2 - Acquisition Parameters  
 Date\_ 20160407  
 Time 5.16  
 INSTRUM spect  
 PROBHD 5 mm PABBO BB-  
 PULPROG zgpg30  
 TD 65536  
 SOLVENT DMSO  
 NS 1024  
 DS 4  
 SWH 32894.738 Hz  
 FIDRES 0.501934 Hz  
 AQ 0.9961472 sec  
 RG 198.55  
 DW 15.200 usec  
 DE 6.50 usec  
 TE 298.1 K  
 D1 2.00000000 sec  
 D11 0.03000000 sec  
 TD0 1

===== CHANNEL f1 =====  
 SFO1 125.7703637 MHz  
 NUC1 <sup>13</sup>C  
 P1 8.99 usec  
 PLW1 125.88999939 W

===== CHANNEL f2 =====  
 SFO2 500.1320005 MHz  
 NUC2 <sup>1</sup>H  
 CPDPRG[2] waltz16  
 PCPD2 80.00 usec  
 PLW2 19.95299911 W  
 PLW12 0.39528000 W  
 PLW13 0.25297999 W

F2 - Processing parameters  
 SI 32768  
 SF 125.7578482 MHz  
 WDW EM  
 SSB 0  
 LB 1.00 Hz  
 GB 0  
 PC 1.40

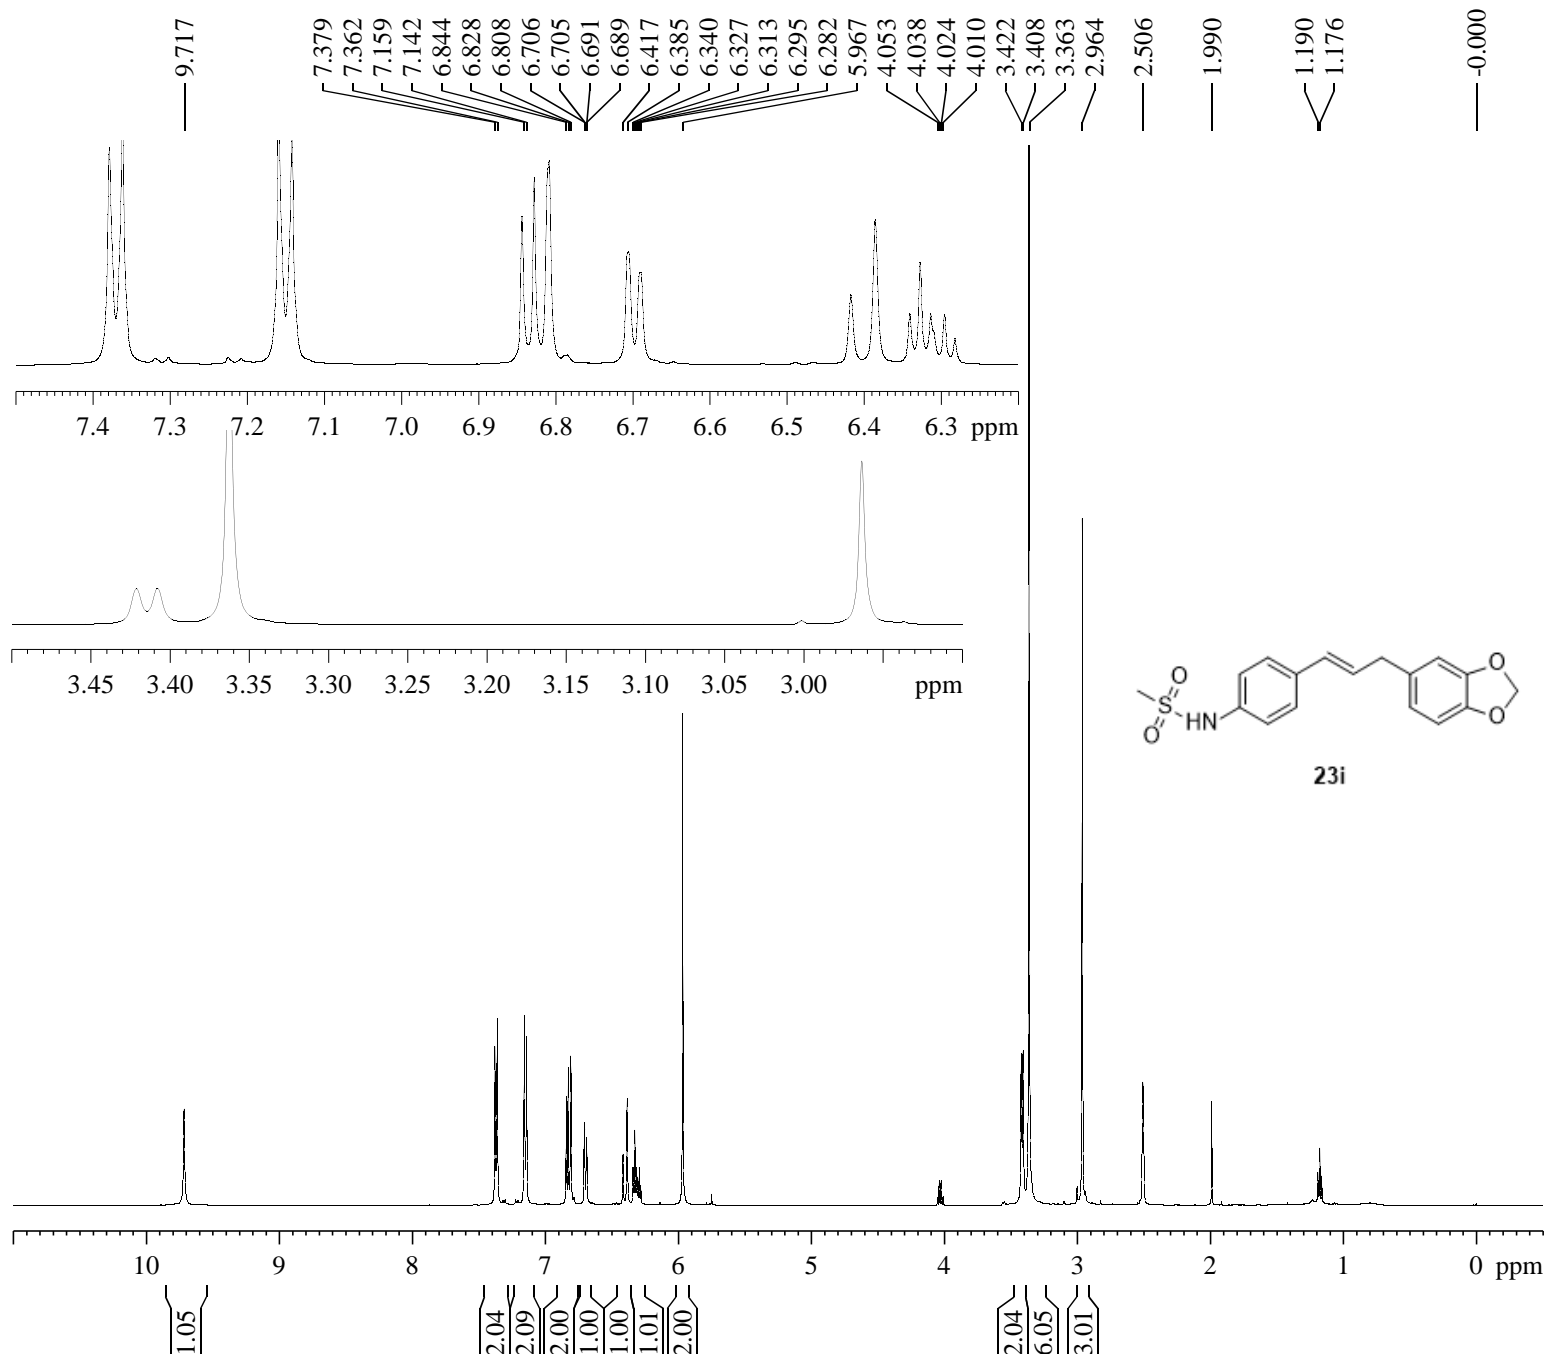

Current Data Parameters  
 NAME NMR16031257-LSS-32  
 EXPNO 1  
 PROCNO 1

F2 - Acquisition Parameters  
 Date\_ 20160330  
 Time 16.39  
 INSTRUM spect  
 PROBHD 5 mm PABBO BB-  
 PULPROG zg30  
 TD 65536  
 SOLVENT DMSO  
 NS 32  
 DS 2  
 SWH 10000.000 Hz  
 FIDRES 0.152588 Hz  
 AQ 3.2767999 sec  
 RG 72.71  
 DW 50.000 usec  
 DE 6.50 usec  
 TE 298.2 K  
 D1 1.00000000 sec  
 TD0 1

===== CHANNEL f1 =====  
 SFO1 500.1330885 MHz  
 NUC1 1H  
 P1 11.26 usec  
 PLW1 19.95299911 W

F2 - Processing parameters  
 SI 65536  
 SF 500.1300013 MHz  
 WDW EM  
 SSB 0  
 LB 0.30 Hz  
 GB 0  
 PC 1.00

— 175.155 — 160.568 — 142.624 — 138.543 — 131.879 — 130.149 — 127.543 — 126.294 — 119.198 — 106.505 — 97.864

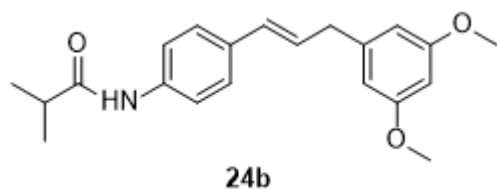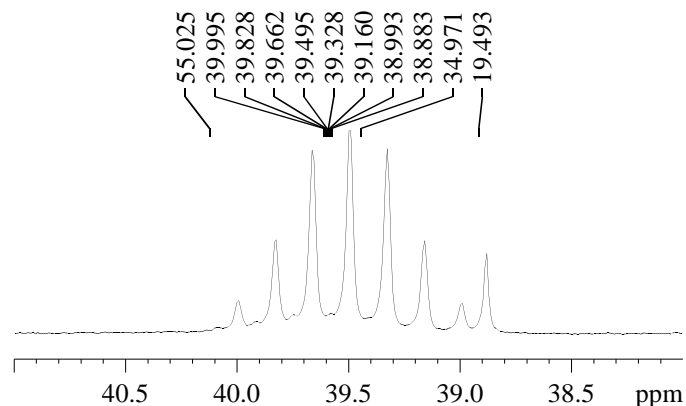

Current Data Parameters  
 NAME NMR16070013-LSS-40  
 EXPNO 2  
 PROCNO 1

F2 - Acquisition Parameters  
 Date\_ 20160706  
 Time 10.11  
 INSTRUM spect  
 PROBHD 5 mm PABBO BB-  
 PULPROG zgpg30  
 TD 65536  
 SOLVENT DMSO  
 NS 256  
 DS 4  
 SWH 34722.223 Hz  
 FIDRES 0.529819 Hz  
 AQ 0.9437184 sec  
 RG 198.55  
 DW 14.400 usec  
 DE 6.50 usec  
 TE 298.2 K  
 D1 2.00000000 sec  
 D11 0.03000000 sec  
 TD0 1

===== CHANNEL f1 =====  
 SFO1 125.7703637 MHz  
 NUC1 13C  
 P1 9.12 usec  
 PLW1 125.88999939 W

===== CHANNEL f2 =====  
 SFO2 500.1320005 MHz  
 NUC2 1H  
 CPDPRG[2] waltz16  
 PCPD2 80.00 usec  
 PLW2 19.95299911 W  
 PLW12 0.41303000 W  
 PLW13 0.26434001 W

F2 - Processing parameters  
 SI 32768  
 SF 125.7578453 MHz  
 WDW EM  
 SSB 0  
 LB 1.00 Hz  
 GB 0  
 PC 1.40

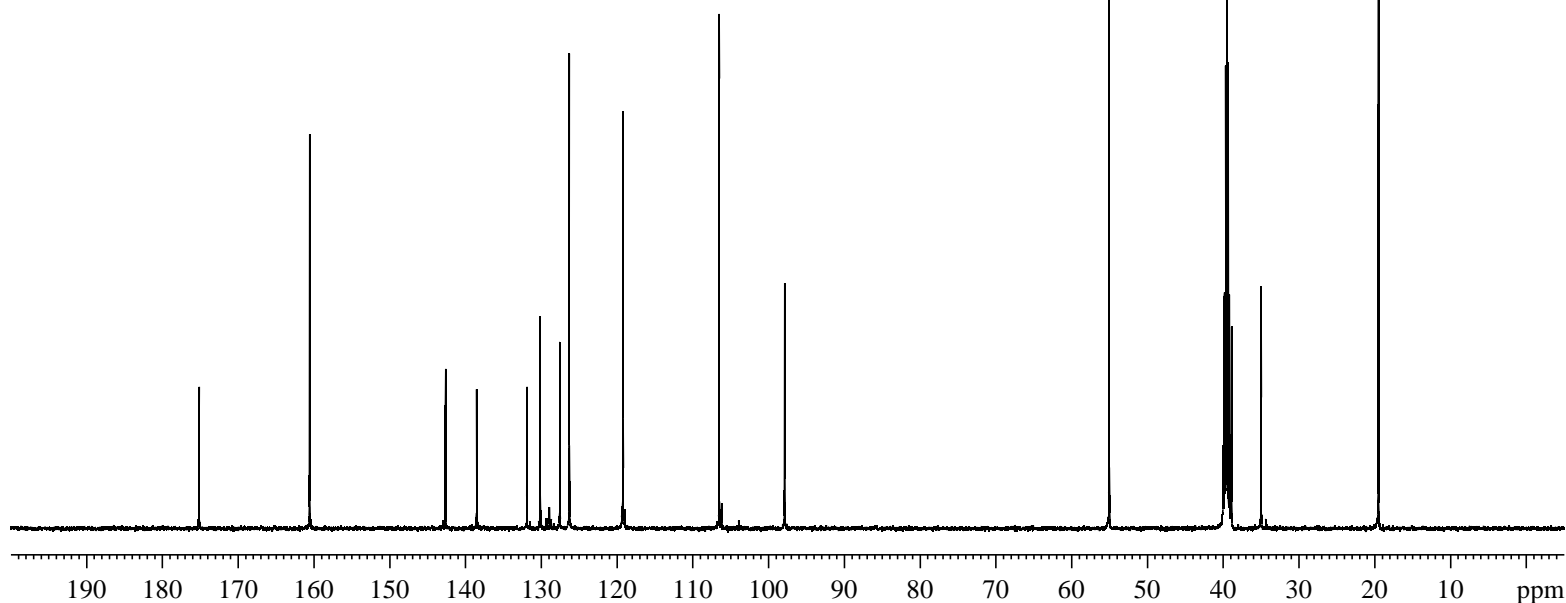

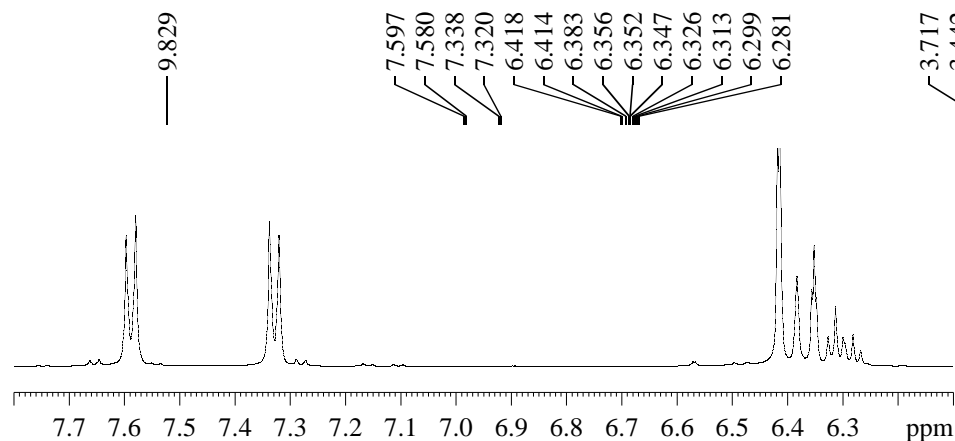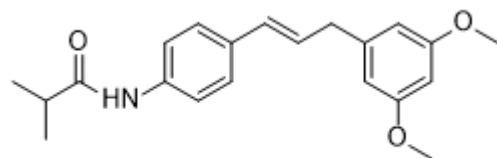

**24b**

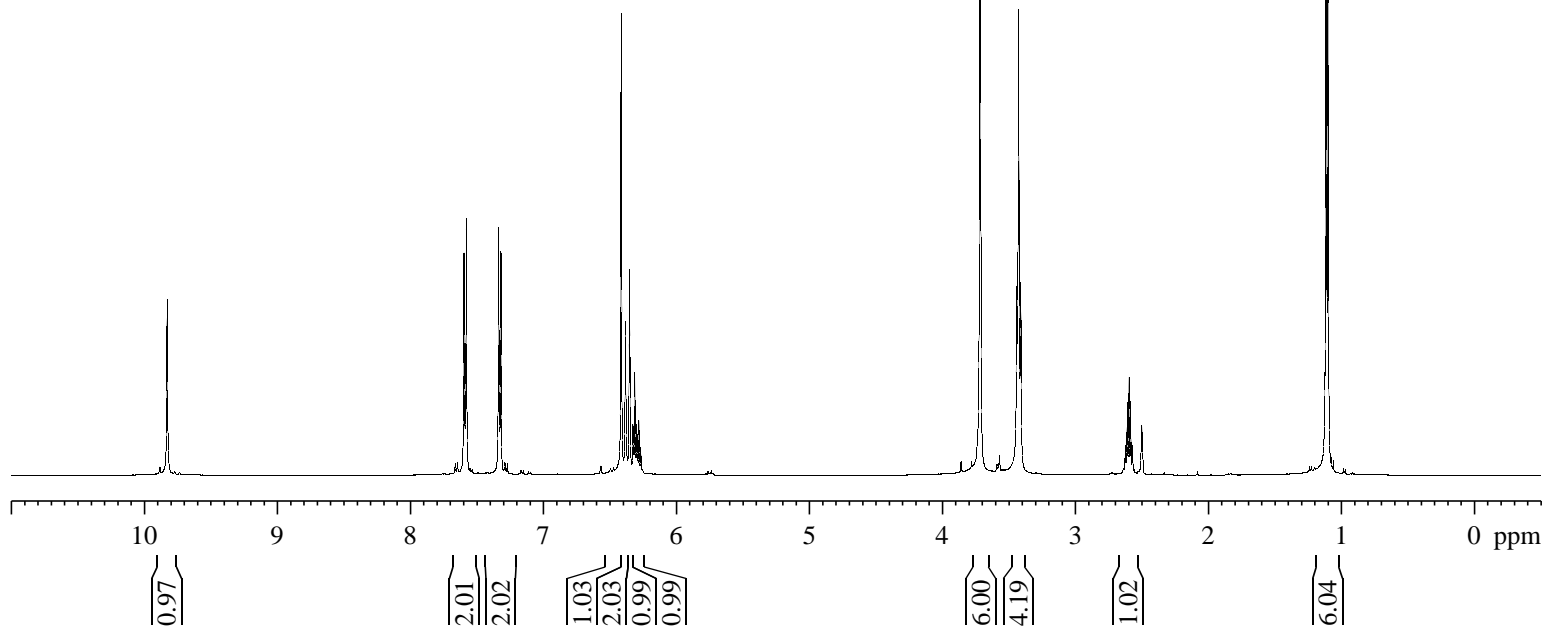

Current Data Parameters  
 NAME NMR16070013-LSS-40  
 EXPNO 1  
 PROCNO 1

F2 - Acquisition Parameters  
 Date\_ 20160705  
 Time 11.16  
 INSTRUM spect  
 PROBHD 5 mm PABBO BB-  
 PULPROG zg30  
 TD 65536  
 SOLVENT DMSO  
 NS 32  
 DS 2  
 SWH 10000.000 Hz  
 FIDRES 0.152588 Hz  
 AQ 3.2767999 sec  
 RG 32.04  
 DW 50.000 usec  
 DE 6.50 usec  
 TE 299.1 K  
 D1 1.00000000 sec  
 TD0 1

===== CHANNEL f1 =====  
 SFO1 500.1325007 MHz  
 NUC1 1H  
 P1 11.51 usec  
 PLW1 19.95299911 W

F2 - Processing parameters  
 SI 65536  
 SF 500.1300044 MHz  
 WDW EM  
 SSB 0  
 LB 0.30 Hz  
 GB 0  
 PC 1.00

MCX

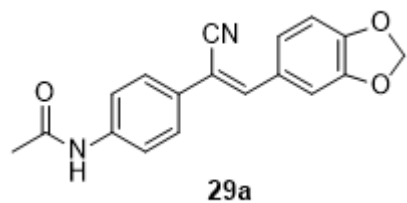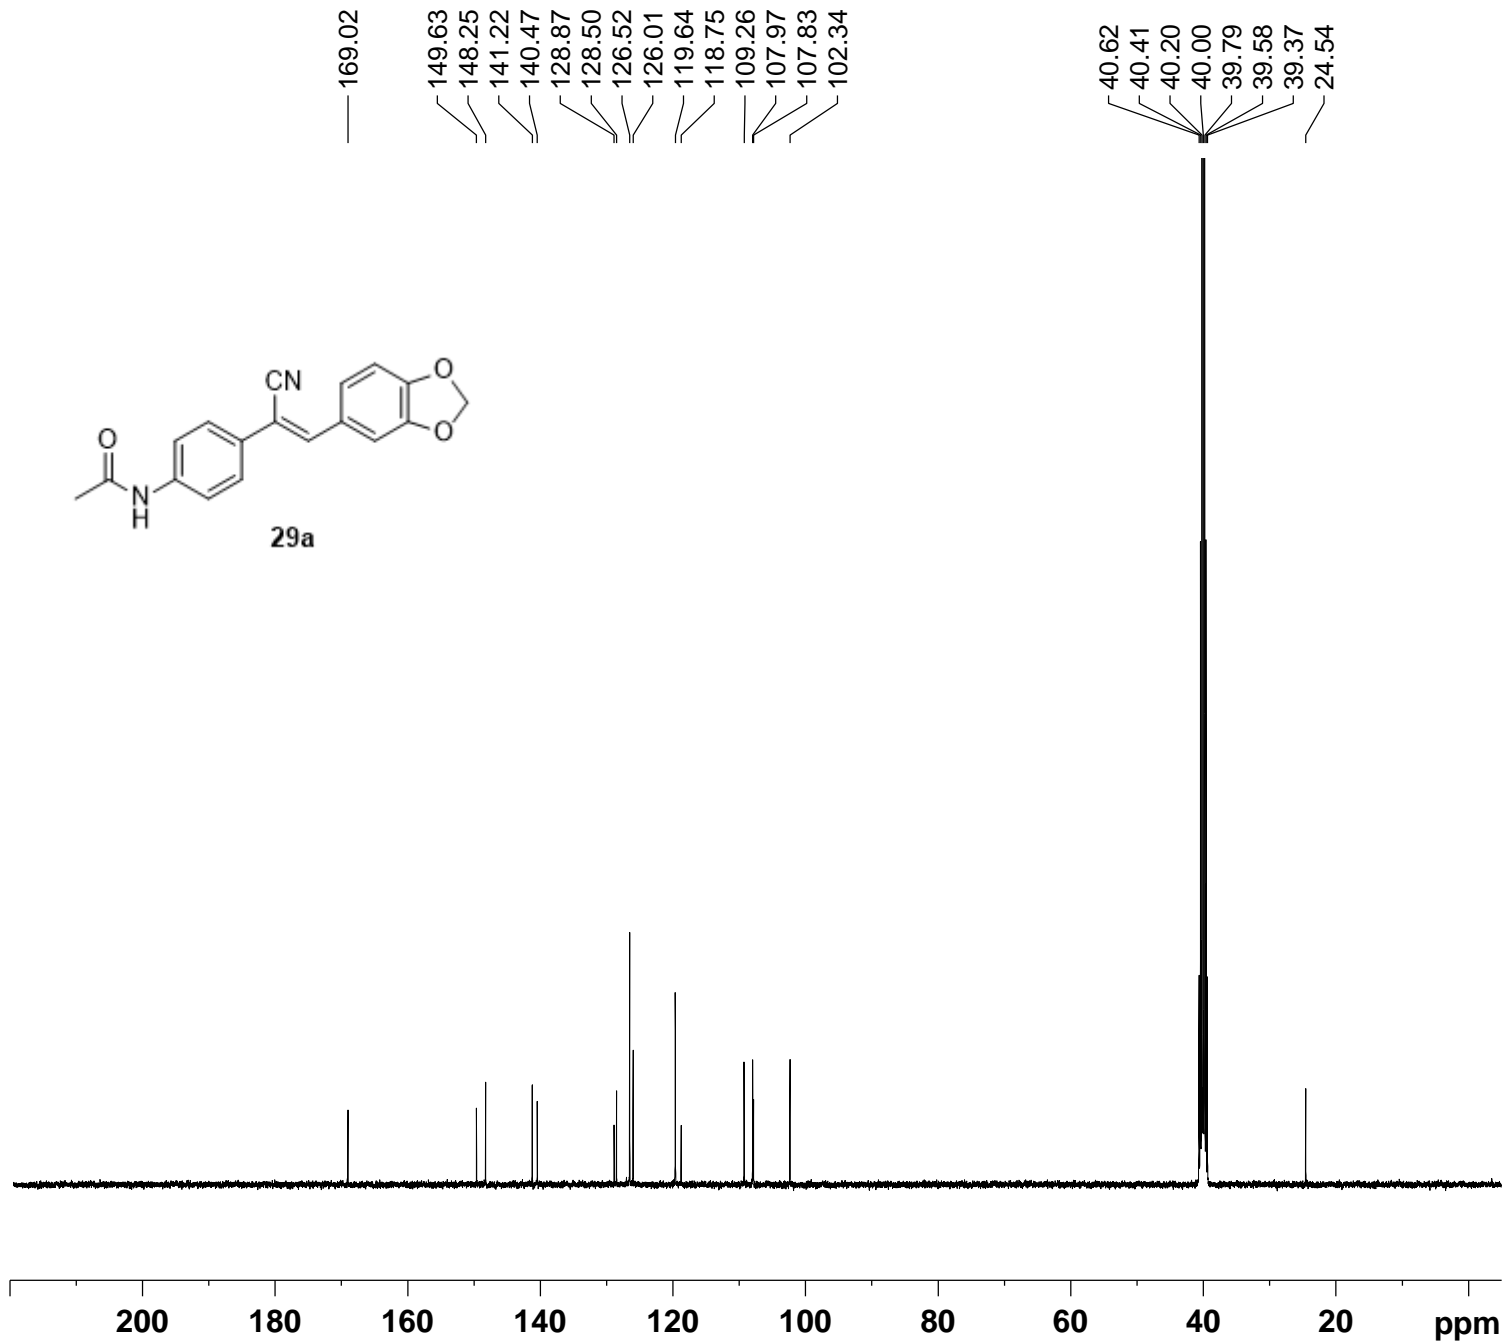

Current Data Parameters  
NAME MCX-70  
EXPNO 2  
PROCNO 1

F2 - Acquisition Parameters  
Date\_ 20190225  
Time 15.00 h  
INSTRUM spect  
PROBHD Z116098\_0436 (  
PULPROG zgpg30  
TD 65536  
SOLVENT DMSO  
NS 1024  
DS 4  
SWH 24038.461 Hz  
FIDRES 0.733596 Hz  
AQ 1.3631488 sec  
RG 202.1  
DW 20.800 usec  
DE 6.50 usec  
TE 298.0 K  
D1 2.00000000 sec  
D11 0.03000000 sec  
TD0 1  
SFO1 100.6278593 MHz  
NUC1 13C  
P1 10.00 usec  
PLW1 68.03199768 W  
SFO2 400.1516006 MHz  
NUC2 1H  
CPDPRG[2] waltz16  
PCPD2 80.00 usec  
PLW2 15.00300026 W  
PLW12 0.20275000 W  
PLW13 0.10182000 W

F2 - Processing parameters  
SI 32768  
SF 100.6177975 MHz  
WDW EM  
SSB 0  
LB 1.00 Hz  
GB 0  
PC 1.40

MCX

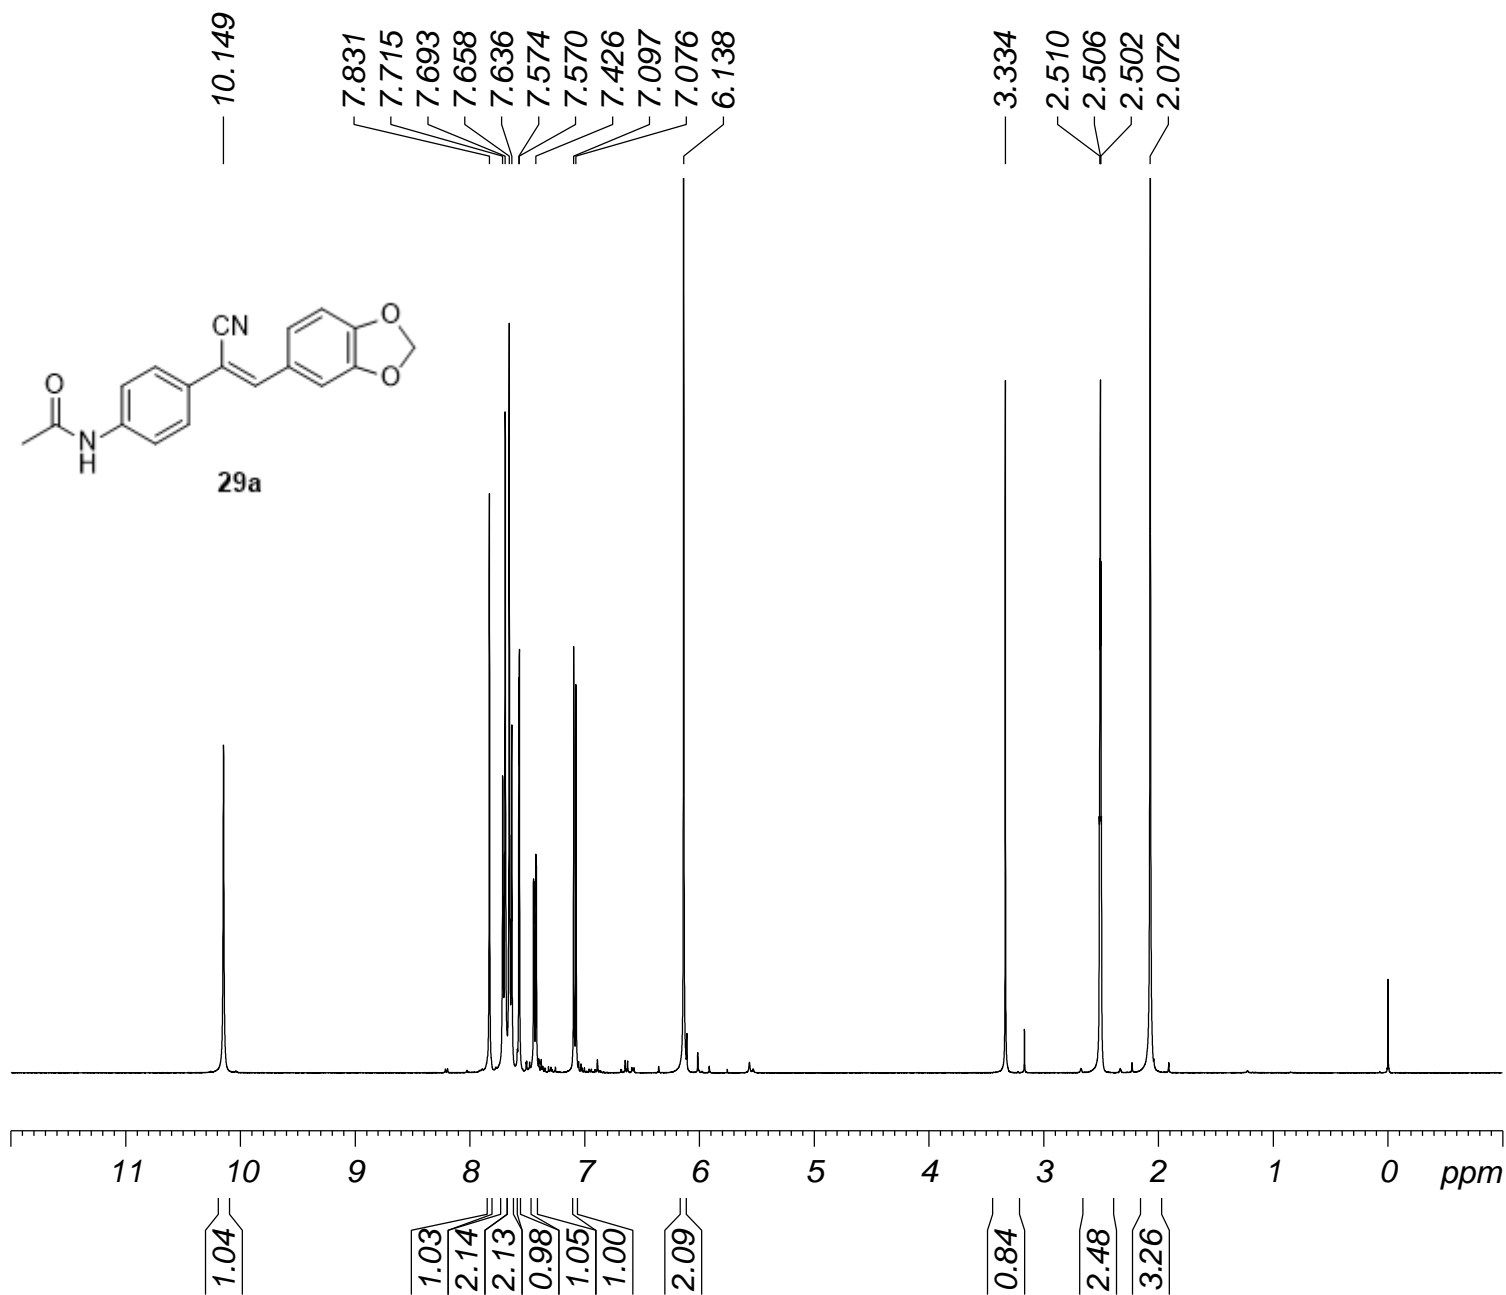

#### Current Data Parameters

NAME MCX-70  
EXPNO 1  
PROCNO 1

#### F2 - Acquisition Parameters

Date\_ 20190221  
Time 18.44 h  
INSTRUM spect  
PROBHD Z116098\_0436 (  
PULPROG zg30  
TD 65536  
SOLVENT DMSO  
NS 16  
DS 2  
SWH 8012.820 Hz  
FIDRES 0.244532 Hz  
AQ 4.0894465 sec  
RG 111.98  
DW 62.400 usec  
DE 6.50 usec  
TE 298.0 K  
D1 1.00000000 sec  
TD0 1  
SFO1 400.1524709 MHz  
NUC1 1H  
P1 8.00 usec  
PLW1 15.00300026 W

#### F2 - Processing parameters

SI 65536  
SF 400.1500008 MHz  
WDW EM  
SSB 0  
LB 0.30 Hz  
GB 0  
PC 1.00



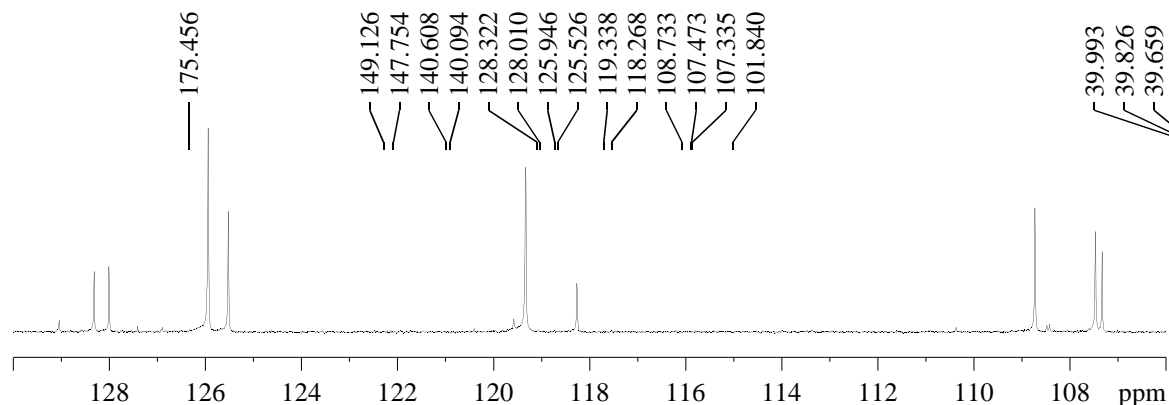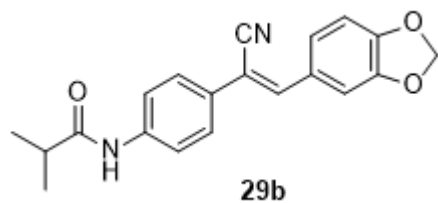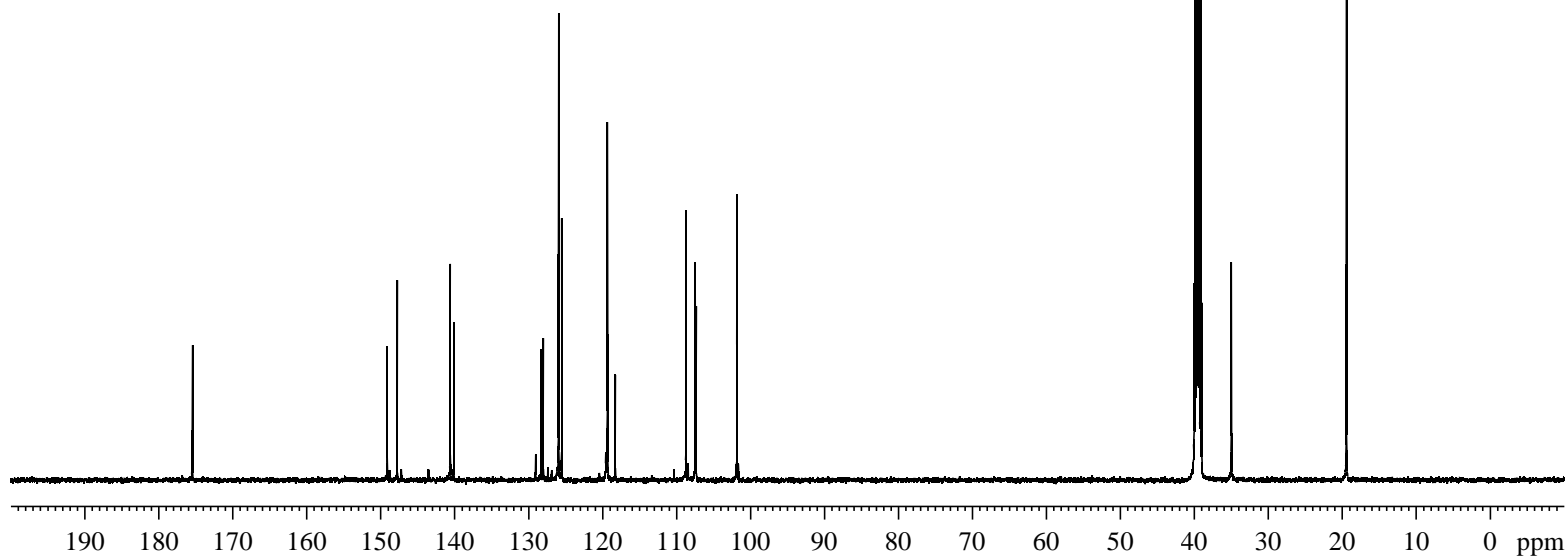

Current Data Parameters  
 NAME NMR16090172-LSS-35-C  
 EXPNO 1  
 PROCNO 1

F2 - Acquisition Parameters  
 Date\_ 20160930  
 Time 12.59  
 INSTRUM spect  
 PROBHD 5 mm PABBO BB-  
 PULPROG zgpg30  
 TD 65536  
 SOLVENT DMSO  
 NS 1024  
 DS 4  
 SWH 34722.223 Hz  
 FIDRES 0.529819 Hz  
 AQ 0.9437184 sec  
 RG 198.55  
 DW 14.400 usec  
 DE 6.50 usec  
 TE 298.2 K  
 D1 2.00000000 sec  
 D11 0.03000000 sec  
 TD0 1

===== CHANNEL f1 =====  
 SFO1 125.7703637 MHz  
 NUC1 13C  
 P1 9.12 usec  
 PLW1 125.88999939 W

===== CHANNEL f2 =====  
 SFO2 500.1320005 MHz  
 NUC2 1H  
 CPDPRG[2] waltz16  
 PCPD2 80.00 usec  
 PLW2 19.95299911 W  
 PLW12 0.41303000 W  
 PLW13 0.26434001 W

F2 - Processing parameters  
 SI 32768  
 SF 125.7578495 MHz  
 WDW EM  
 SSB 0  
 LB 1.00 Hz  
 GB 0  
 PC 1.40

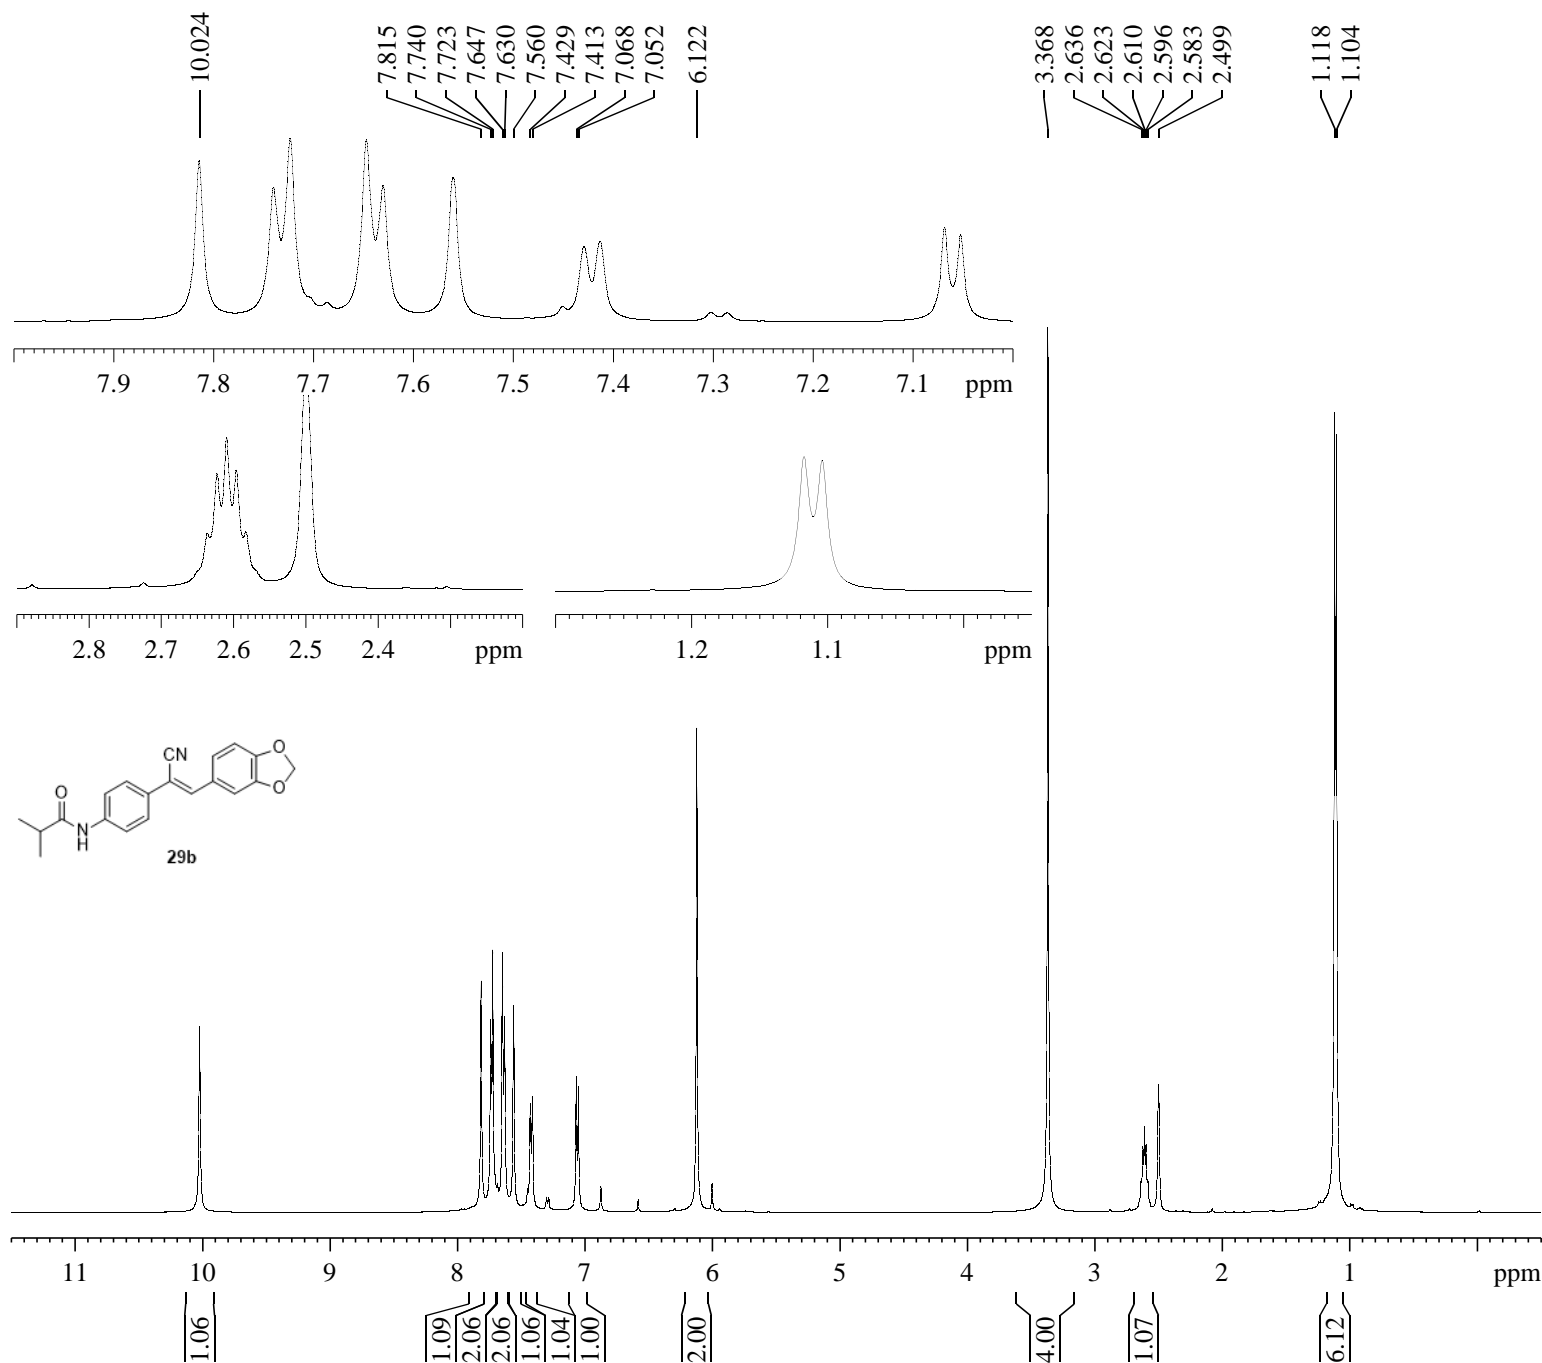

Current Data Parameters  
 NAME NMR16090160-LSS-35  
 EXPNO 1  
 PROCNO 1

F2 - Acquisition Parameters  
 Date\_ 20160928  
 Time 13.23  
 INSTRUM spect  
 PROBHD 5 mm PABBO BB-  
 PULPROG zg30  
 TD 65536  
 SOLVENT DMSO  
 NS 128  
 DS 2  
 SWH 10000.000 Hz  
 FIDRES 0.152588 Hz  
 AQ 3.2767999 sec  
 RG 62.41  
 DW 50.000 usec  
 DE 6.50 usec  
 TE 298.2 K  
 D1 1.00000000 sec  
 TD0 1

===== CHANNEL f1 =====  
 SFO1 500.1330885 MHz  
 NUC1 1H  
 P1 11.51 usec  
 PLW1 19.95299911 W

F2 - Processing parameters  
 SI 65536  
 SF 500.1300050 MHz  
 WDW EM  
 SSB 0  
 LB 0.30 Hz  
 GB 0  
 PC 1.00

MCX

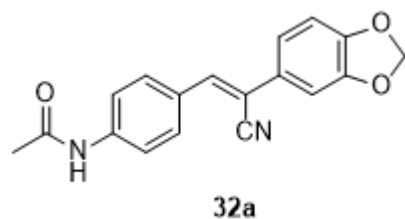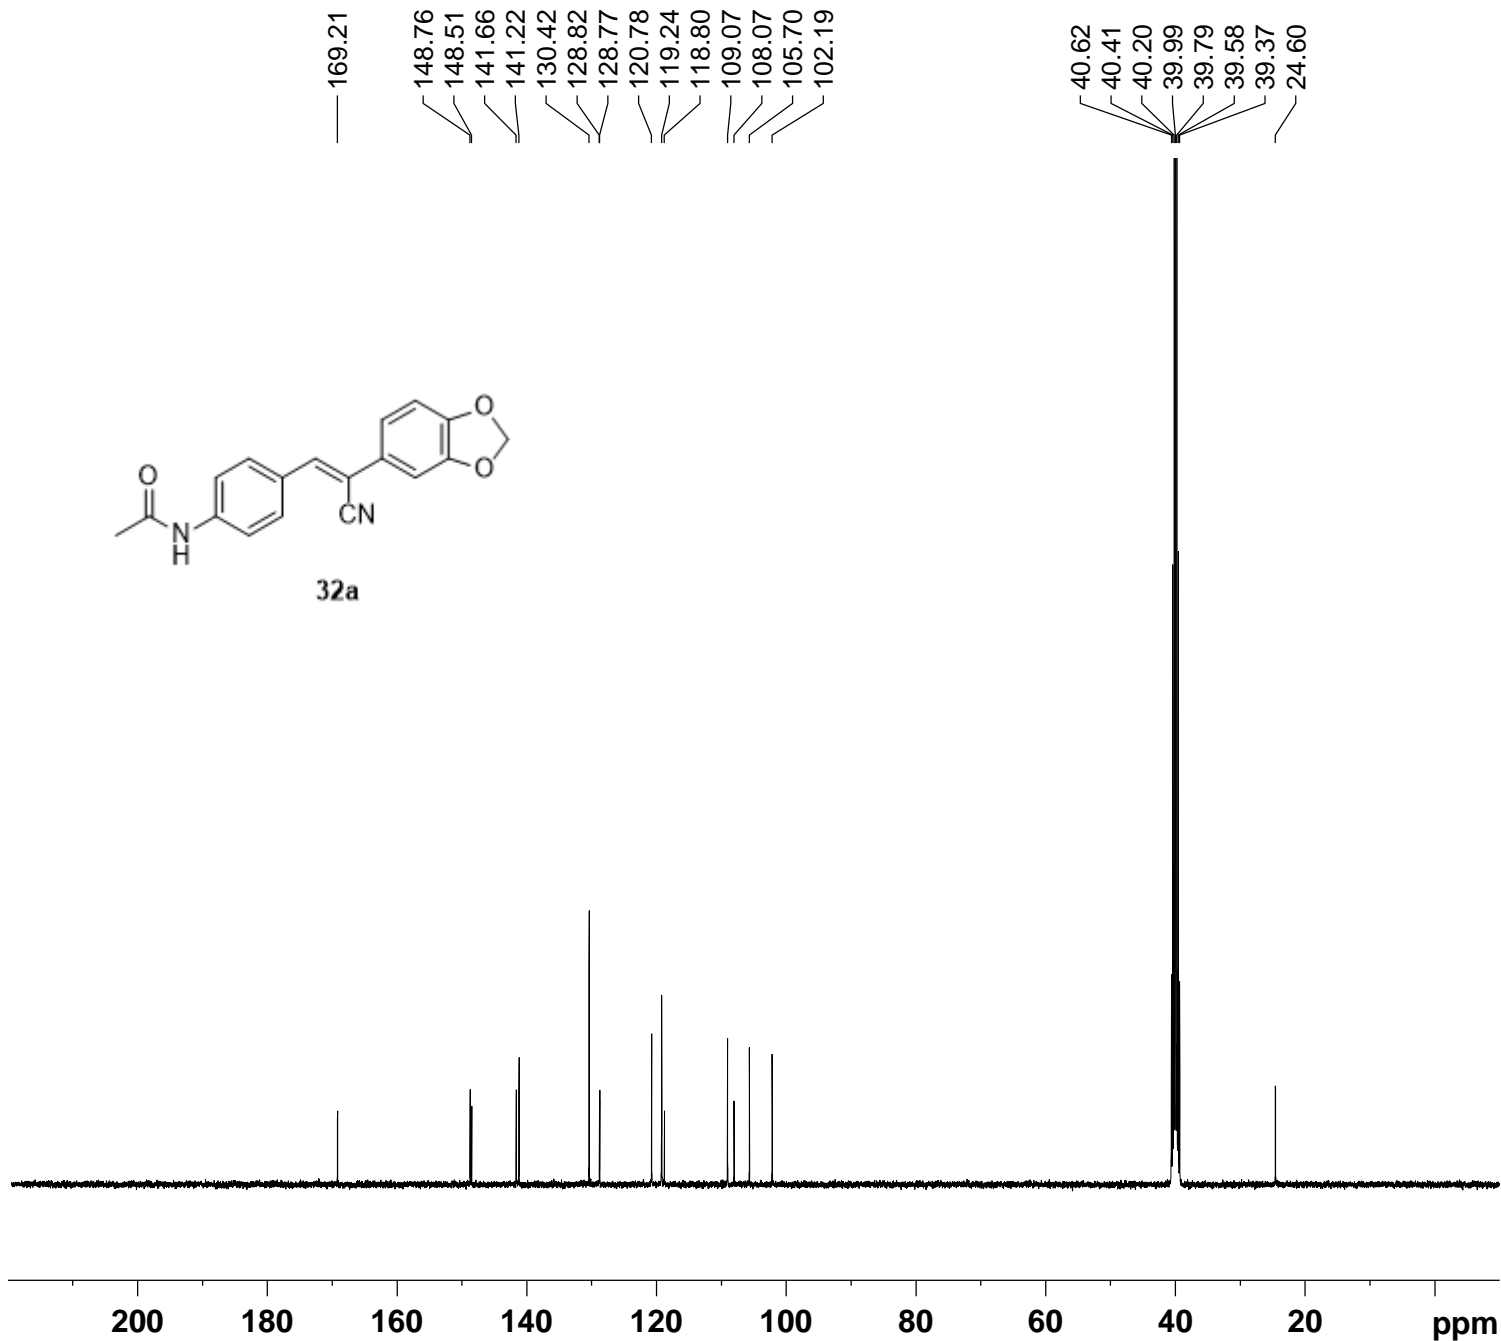

Current Data Parameters  
NAME MCX-71  
EXPNO 2  
PROCNO 1

F2 - Acquisition Parameters  
Date\_ 20190225  
Time 13.51 h  
INSTRUM spect  
PROBHD Z116098\_0436 (zpgpg30)  
PULPROG zgpg30  
TD 65536  
SOLVENT DMSO  
NS 1024  
DS 4  
SWH 24038.461 Hz  
FIDRES 0.733596 Hz  
AQ 1.3631488 sec  
RG 202.1  
DW 20.800 usec  
DE 6.50 usec  
TE 298.0 K  
D1 2.00000000 sec  
D11 0.03000000 sec  
TD0 1  
SFO1 100.6278593 MHz  
NUC1 13C  
P1 10.00 usec  
PLW1 68.03199768 W  
SFO2 400.1516006 MHz  
NUC2 1H  
CPDPRG[2] waltz16  
PCPD2 80.00 usec  
PLW2 15.00300026 W  
PLW12 0.20275000 W  
PLW13 0.10182000 W

F2 - Processing parameters  
SI 32768  
SF 100.6177975 MHz  
WDW EM  
SSB 0  
LB 1.00 Hz  
GB 0  
PC 1.40

MCX

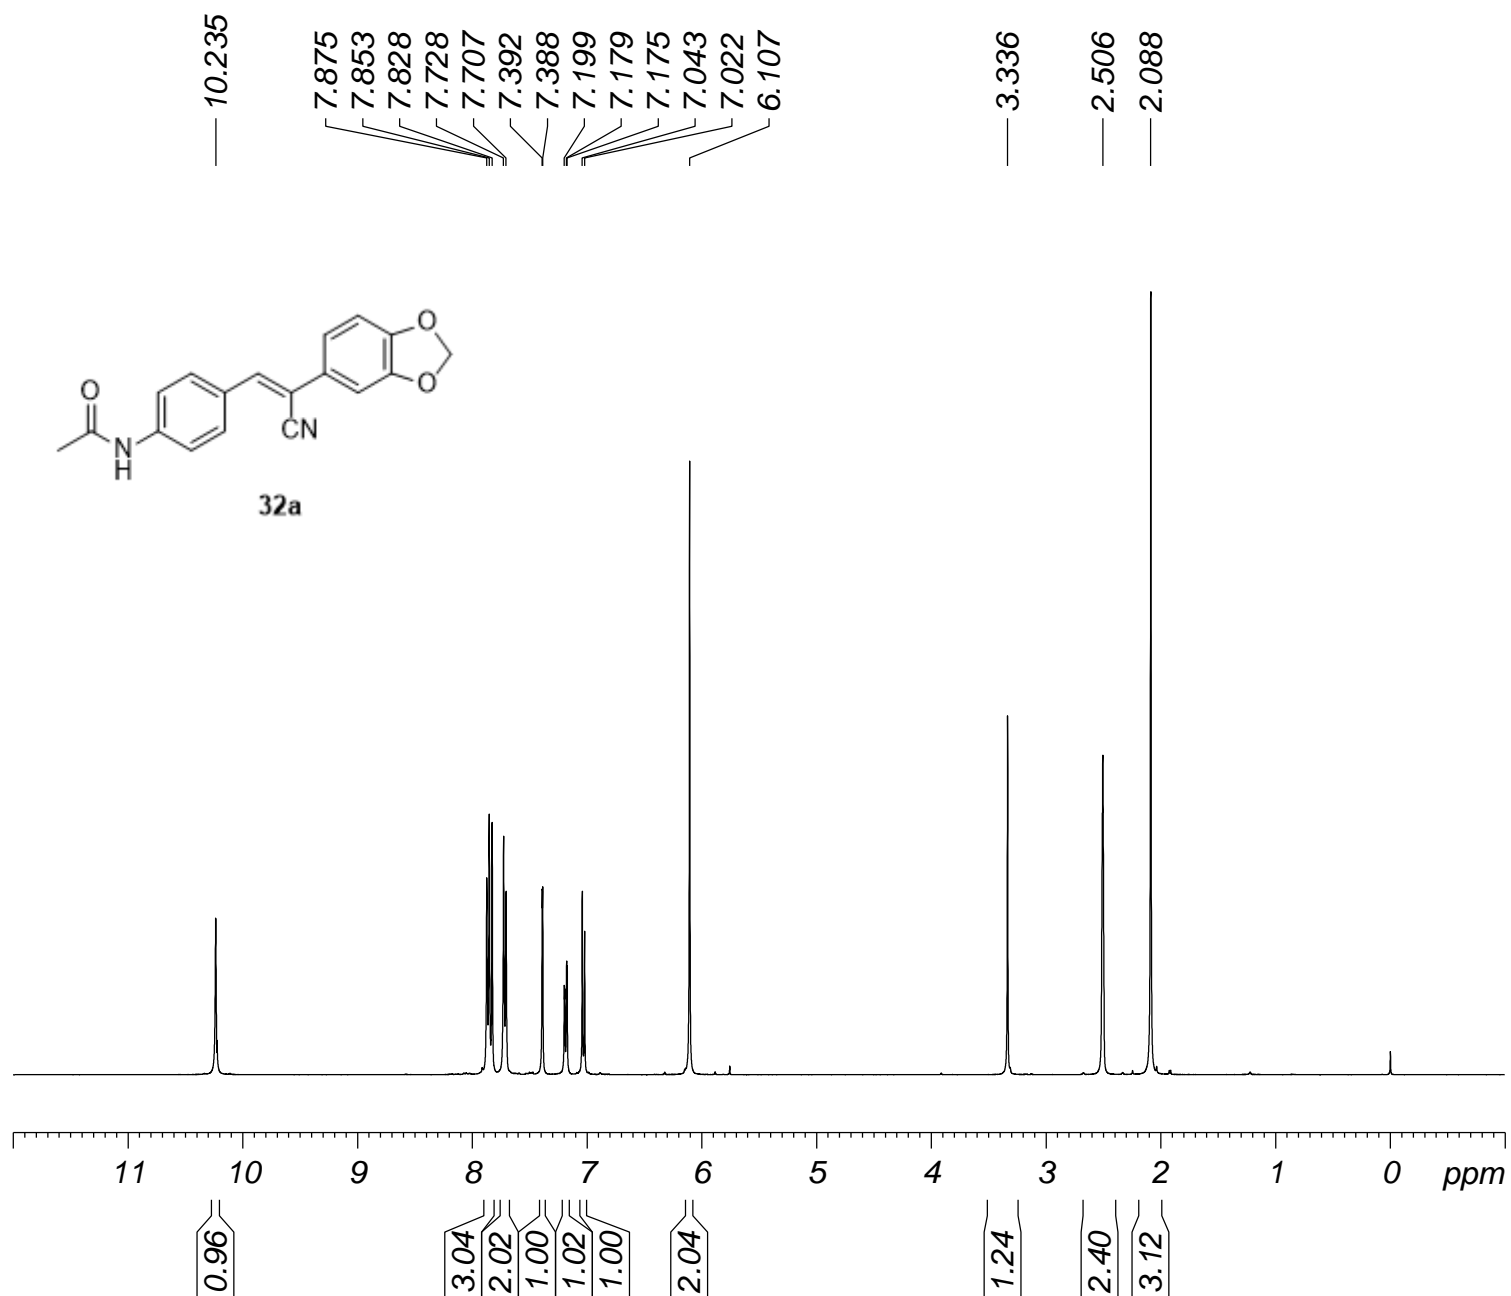

Current Data Parameters

NAME MCX-71  
EXPNO 1  
PROCNO 1

F2 - Acquisition Parameters

Date\_ 20190221  
Time 18.33 h  
INSTRUM spect  
PROBHD Z116098\_0436 (zg30)  
PULPROG zg30  
TD 65536  
SOLVENT DMSO  
NS 16  
DS 2  
SWH 8012.820 Hz  
FIDRES 0.244532 Hz  
AQ 4.0894465 sec  
RG 111.98  
DW 62.400 usec  
DE 6.50 usec  
TE 298.0 K  
D1 1.00000000 sec  
TD0 1  
SFO1 400.1524709 MHz  
NUC1 1H  
P1 8.00 usec  
PLW1 15.00300026 W

F2 - Processing parameters

SI 65536  
SF 400.1500006 MHz  
WDW EM  
SSB 0  
LB 0.30 Hz  
GB 0  
PC 1.00

MCX

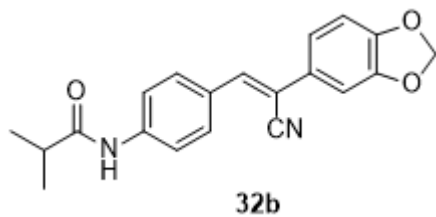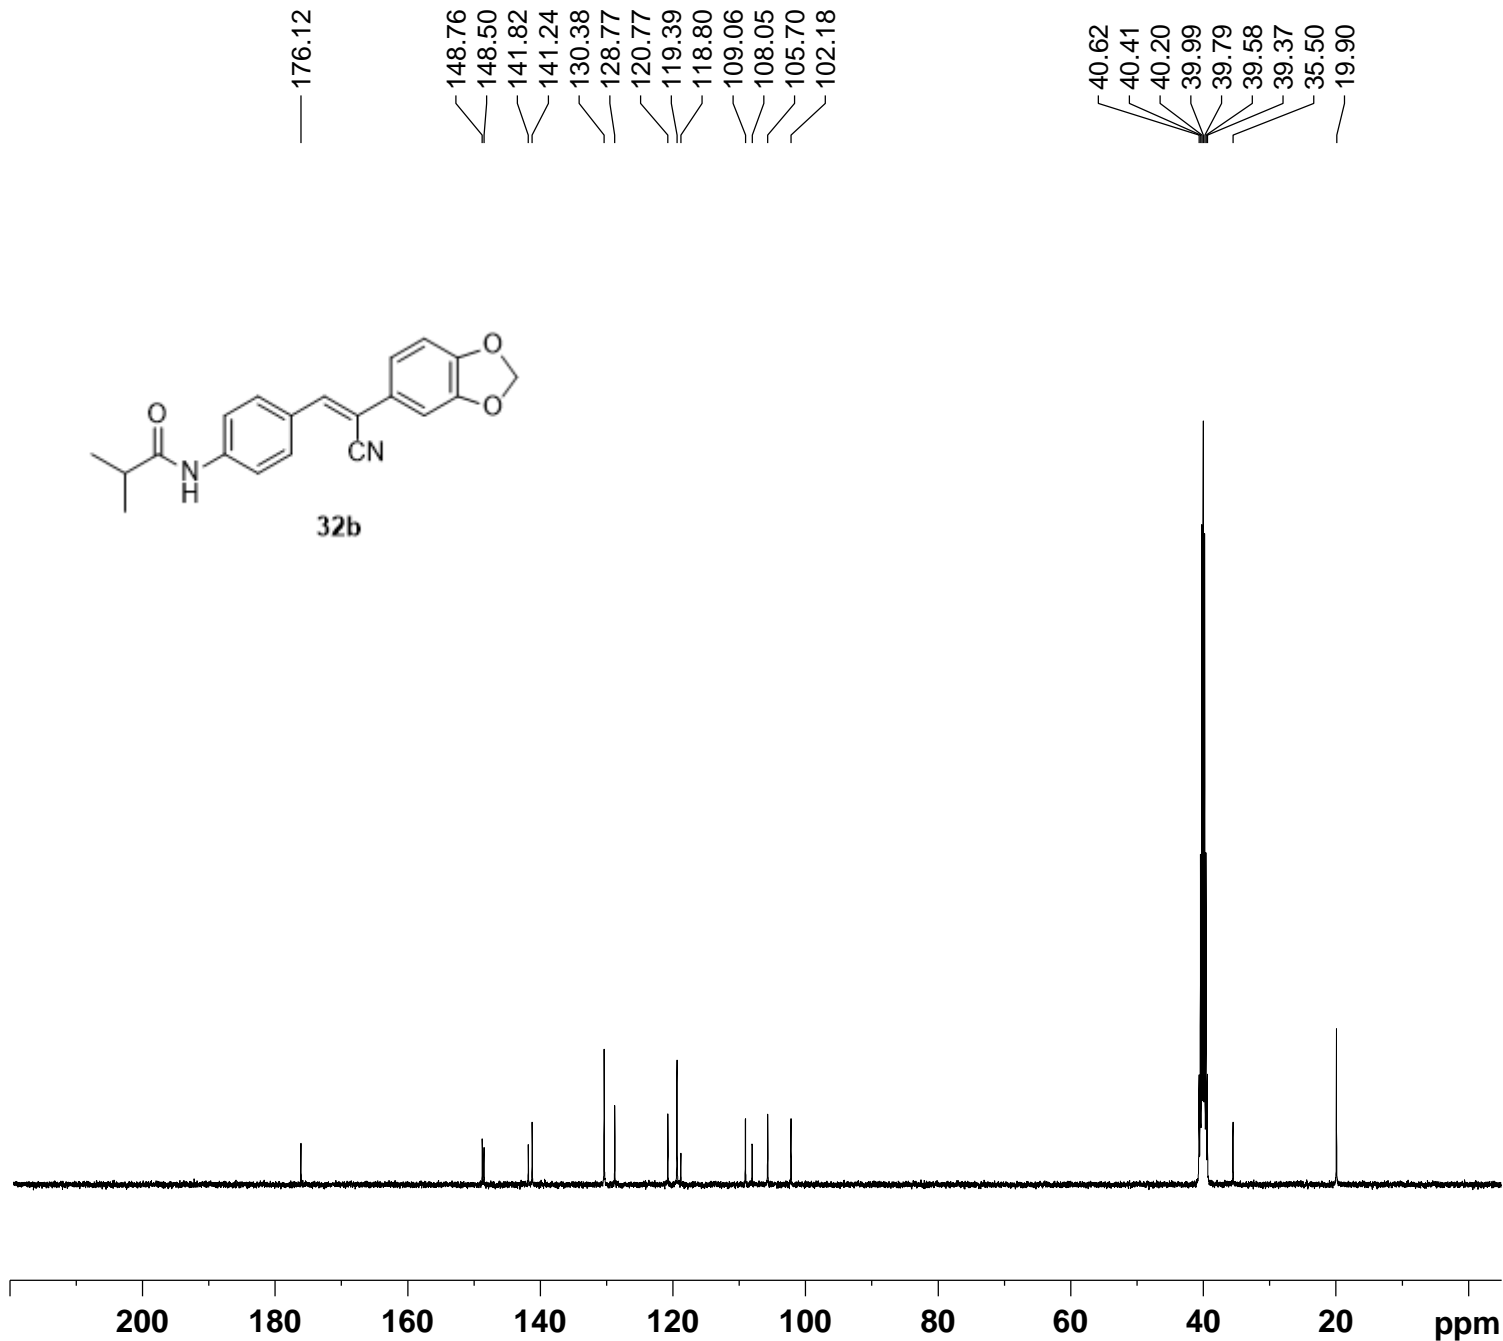

Current Data Parameters  
NAME MCX-67-C  
EXPNO 1  
PROCNO 1

F2 - Acquisition Parameters  
Date\_ 20190111  
Time 16.35 h  
INSTRUM spect  
PROBHD Z116098\_0436 (zpgp30)  
PULPROG zgpg30  
TD 65536  
SOLVENT DMSO  
NS 835  
DS 4  
SWH 24038.461 Hz  
FIDRES 0.733596 Hz  
AQ 1.3631488 sec  
RG 202.1  
DW 20.800 usec  
DE 6.50 usec  
TE 298.0 K  
D1 2.00000000 sec  
D11 0.03000000 sec  
TD0 1  
SFO1 100.6278593 MHz  
NUC1 13C  
P1 10.00 usec  
PLW1 68.03199768 W  
SFO2 400.1516006 MHz  
NUC2 1H  
CPDPRG[2] waltz16  
PCPD2 80.00 usec  
PLW2 15.00300026 W  
PLW12 0.15003000 W  
PLW13 0.07534400 W

F2 - Processing parameters  
SI 32768  
SF 100.6177975 MHz  
WDW EM  
SSB 0  
LB 1.00 Hz  
GB 0  
PC 1.40

MCX

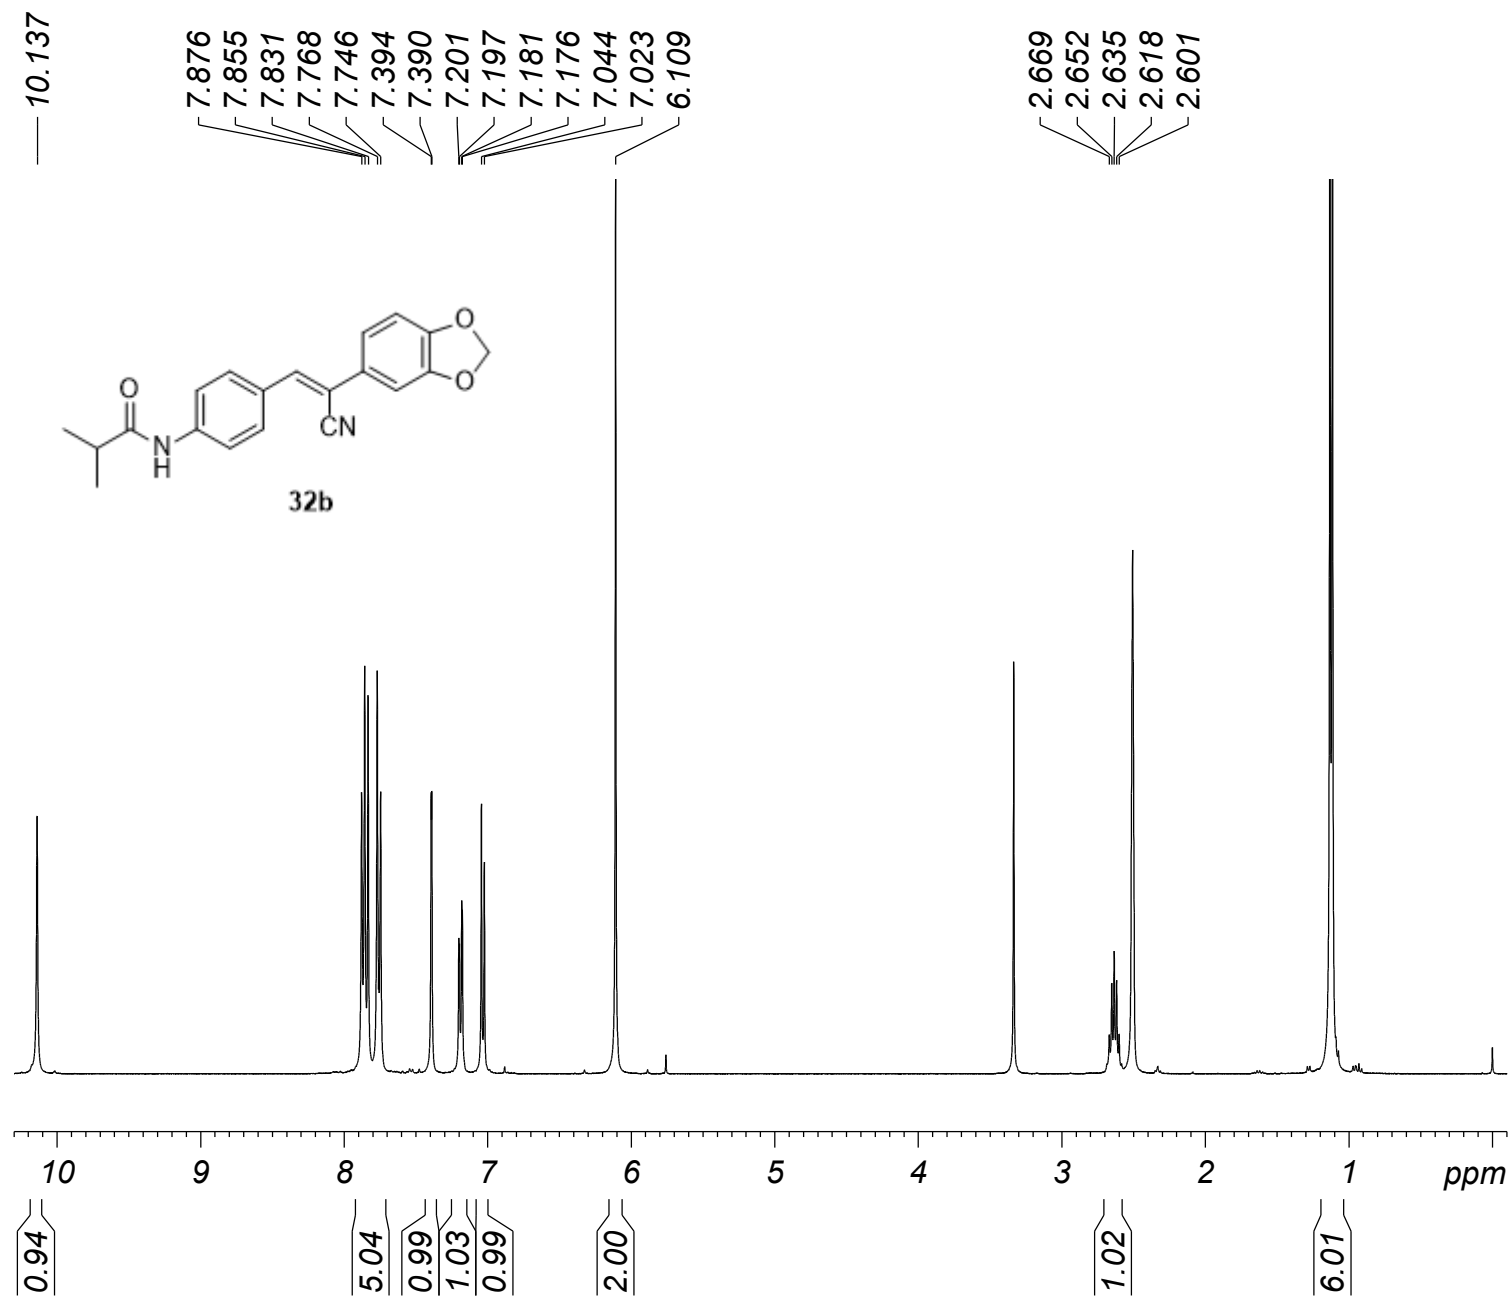

Current Data Parameters  
 NAME MCX-67-H  
 EXPNO 2  
 PROCNO 1

F2 - Acquisition Parameters  
 Date\_ 20190221  
 Time\_ 18.48 h  
 INSTRUM spect  
 PROBHD Z116098\_0436 (zg30)  
 PULPROG zg30  
 TD 65536  
 SOLVENT DMSO  
 NS 16  
 DS 2  
 SWH 8012.820 Hz  
 FIDRES 0.244532 Hz  
 AQ 4.0894465 sec  
 RG 98.25  
 DW 62.400 usec  
 DE 6.50 usec  
 TE 298.0 K  
 D1 1.00000000 sec  
 TD0 1  
 SFO1 400.1524709 MHz  
 NUC1 1H  
 P1 8.00 usec  
 PLW1 15.00300026 W

F2 - Processing parameters  
 SI 65536  
 SF 400.1500005 MHz  
 WDW EM  
 SSB 0  
 LB 0.30 Hz  
 GB 0  
 PC 1.00

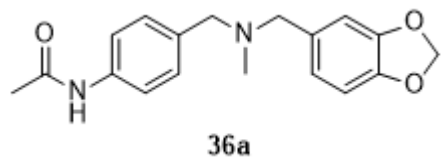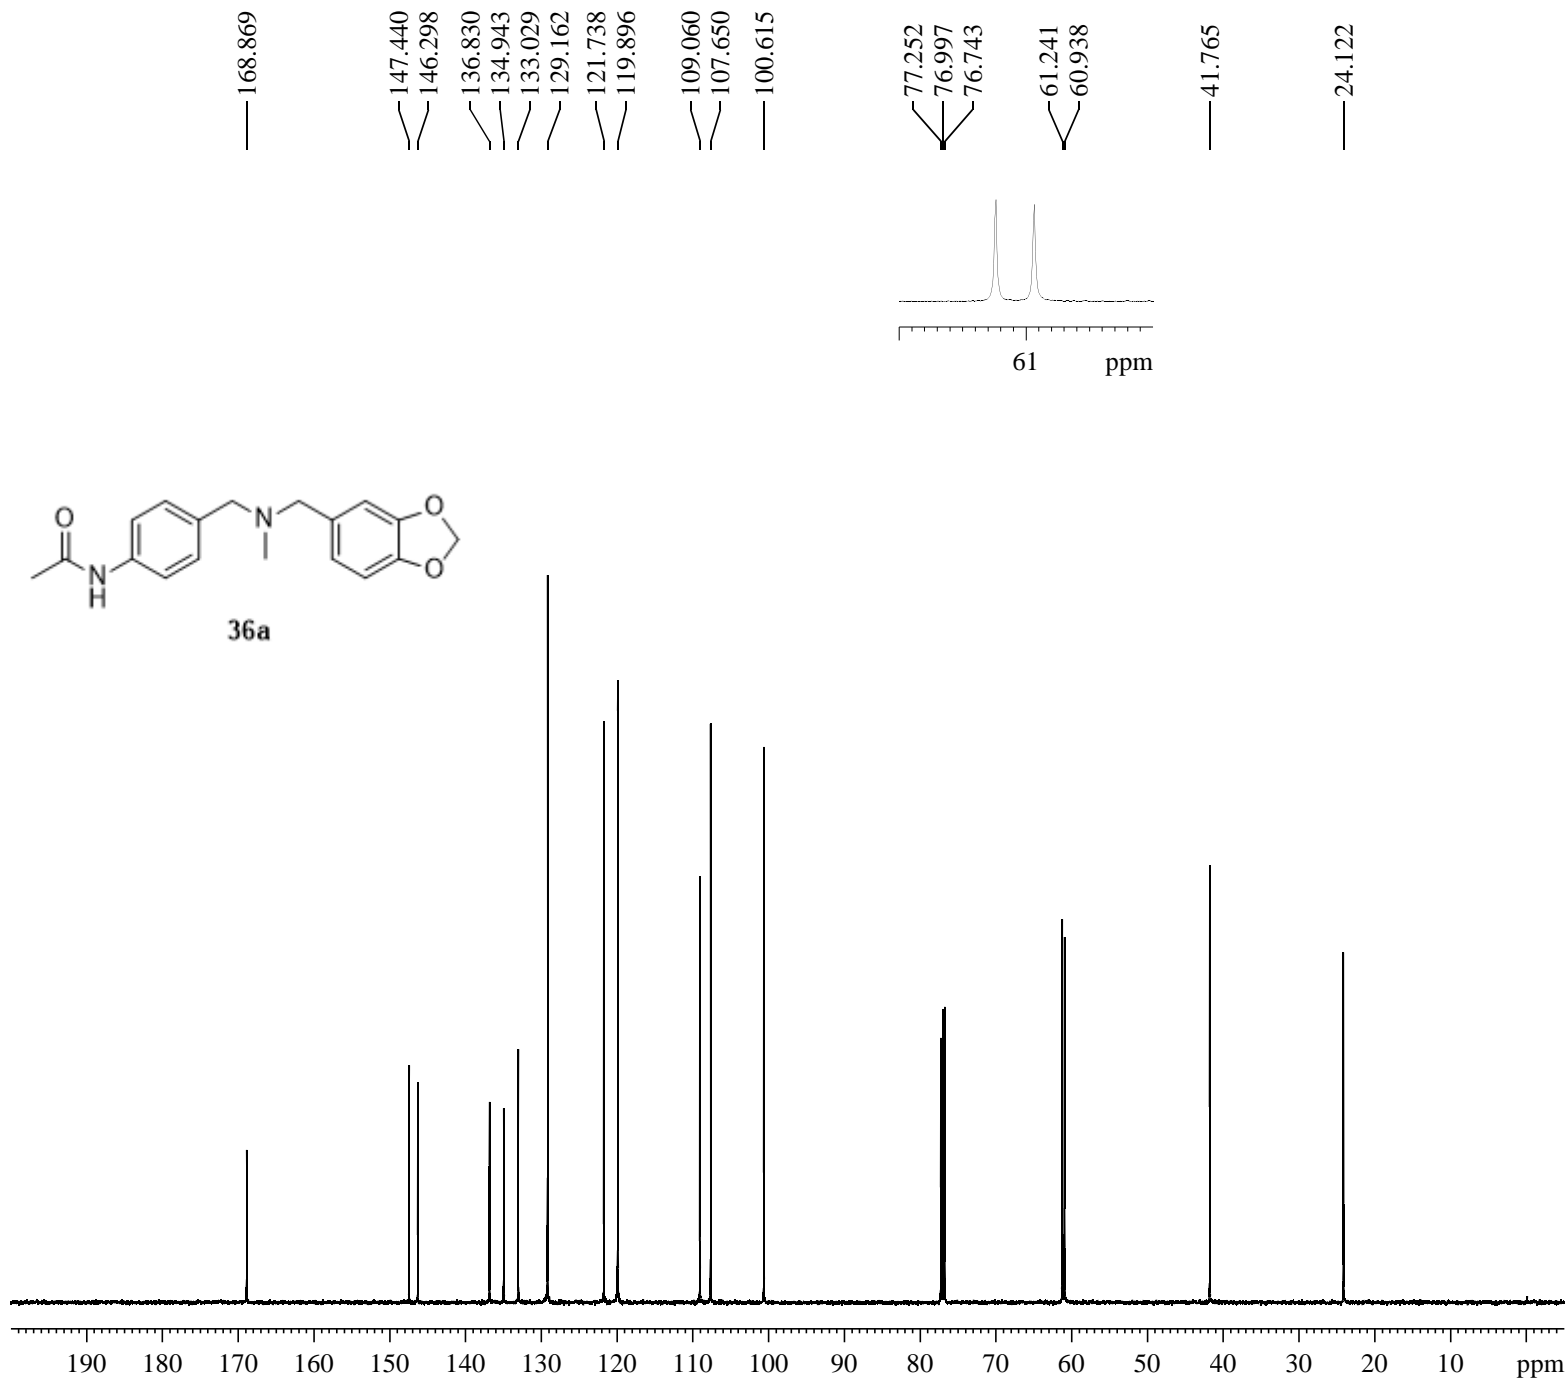

Current Data Parameters  
 NAME 150033-LSS-3  
 EXPNO 2  
 PROCNO 1

F2 - Acquisition Parameters  
 Date\_ 20150612  
 Time 7.47  
 INSTRUM spect  
 PROBHD 5 mm PABBO BB-  
 PULPROG zgpg30  
 TD 65536  
 SOLVENT CDCl3  
 NS 256  
 DS 4  
 SWH 34722.223 Hz  
 FIDRES 0.529819 Hz  
 AQ 0.9437184 sec  
 RG 198.55  
 DW 14.400 usec  
 DE 6.50 usec  
 TE 303.2 K  
 D1 2.00000000 sec  
 D11 0.03000000 sec  
 TD0 1

===== CHANNEL f1 =====  
 SFO1 125.7703637 MHz  
 NUC1 13C  
 P1 8.99 usec  
 PLW1 125.88999939 W

===== CHANNEL f2 =====  
 SFO2 500.1320005 MHz  
 NUC2 1H  
 CPDPRG[2] waltz16  
 PCPD2 80.00 usec  
 PLW2 19.95299911 W  
 PLW12 0.39528000 W  
 PLW13 0.25297999 W

F2 - Processing parameters  
 SI 32768  
 SF 125.7578151 MHz  
 WDW EM  
 SSB 0  
 LB 1.00 Hz  
 GB 0  
 PC 1.40

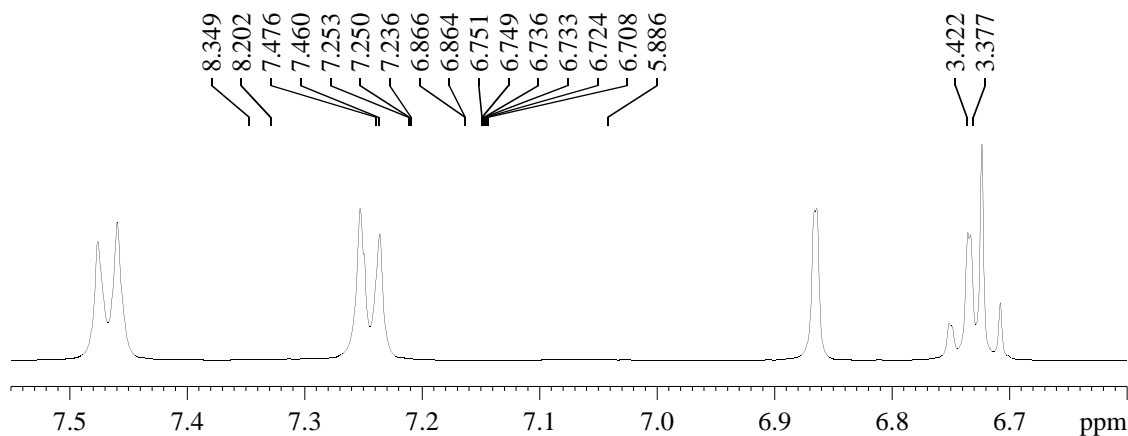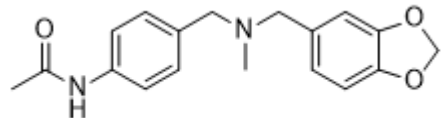

**36a**

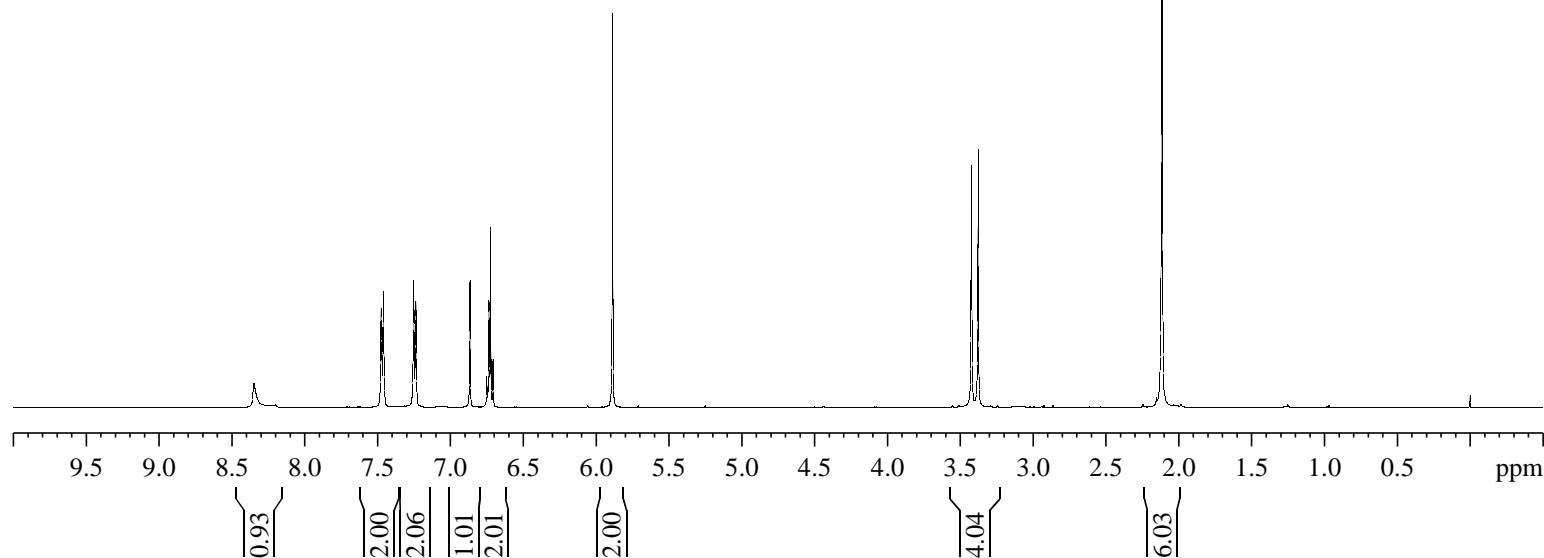

Current Data Parameters  
 NAME 150033-LSS-3  
 EXPNO 1  
 PROCNO 1

F2 - Acquisition Parameters  
 Date\_ 20150610  
 Time 11.13  
 INSTRUM spect  
 PROBHD 5 mm PABBO BB-  
 PULPROG zg30  
 TD 65536  
 SOLVENT CDCl3  
 NS 16  
 DS 0  
 SWH 10000.000 Hz  
 FIDRES 0.152588 Hz  
 AQ 3.2767999 sec  
 RG 20.1  
 DW 50.000 usec  
 DE 6.50 usec  
 TE 303.1 K  
 D1 1.00000000 sec  
 TD0 1

===== CHANNEL f1 =====  
 SFO1 500.1330885 MHz  
 NUC1 1H  
 P1 11.26 usec  
 PLW1 19.95299911 W

F2 - Processing parameters  
 SI 65536  
 SF 500.1300170 MHz  
 WDW EM  
 SSB 0  
 LB 0.30 Hz  
 GB 0  
 PC 1.00



FBZ

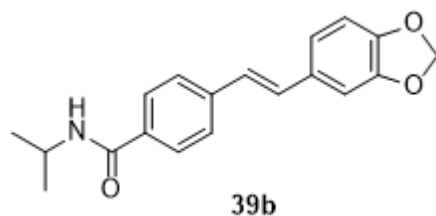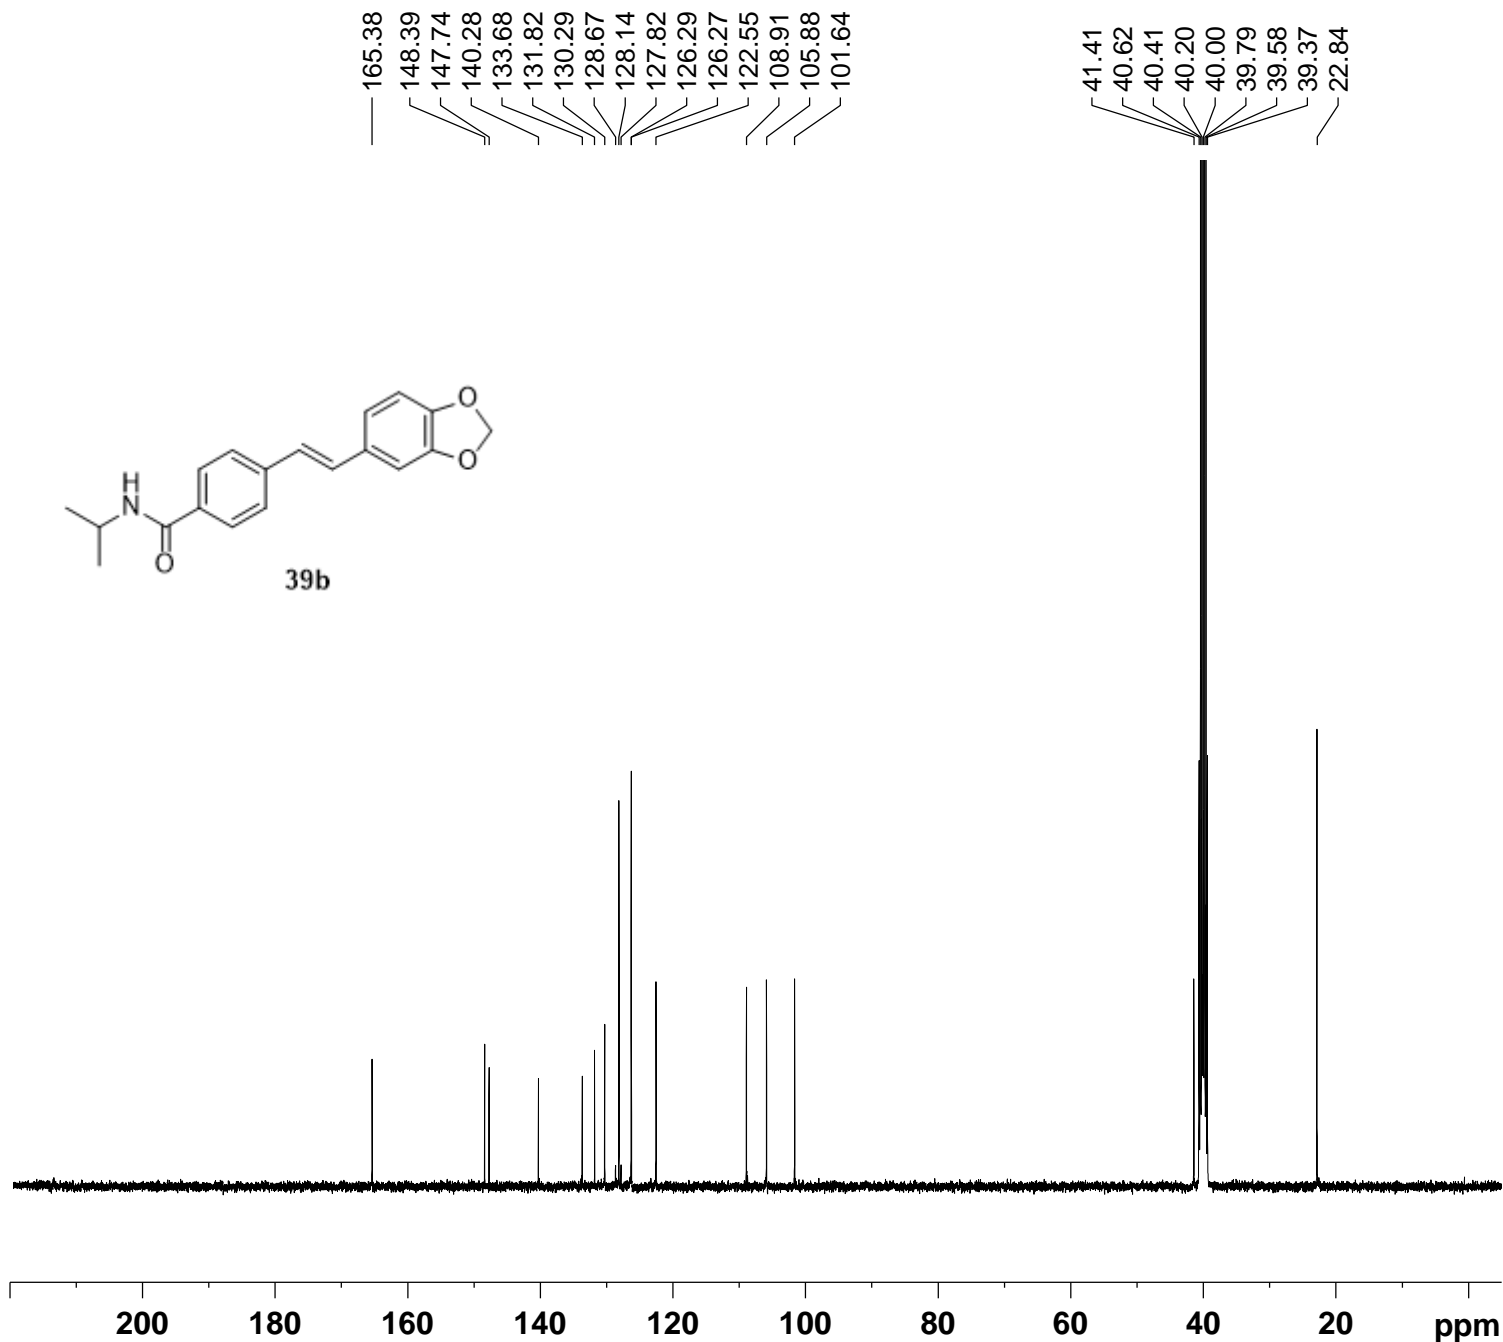

Current Data Parameters  
NAME MCX-1-1201-C  
EXPNO 1  
PROCNO 1

F2 - Acquisition Parameters  
Date\_ 20171201  
Time 23.17 h  
INSTRUM spect  
PROBHD Z116098\_0436 (   
PULPROG zgpg30  
TD 65536  
SOLVENT DMSO  
NS 2200  
DS 4  
SWH 24038.461 Hz  
FIDRES 0.733596 Hz  
AQ 1.3631488 sec  
RG 202.1  
DW 20.800 usec  
DE 6.50 usec  
TE 298.0 K  
D1 2.00000000 sec  
D11 0.03000000 sec  
TD0 1  
SFO1 100.6278593 MHz  
NUC1 13C  
P1 10.00 usec  
PLW1 68.03199768 W  
SFO2 400.1516006 MHz  
NUC2 1H  
CPDPRG[2] waltz16  
PCPD2 80.00 usec  
PLW2 15.00300026 W  
PLW12 0.22284999 W  
PLW13 0.11191000 W

F2 - Processing parameters  
SI 32768  
SF 100.6177975 MHz  
WDW EM  
SSB 0  
LB 1.00 Hz  
GB 0  
PC 1.40

FBZ

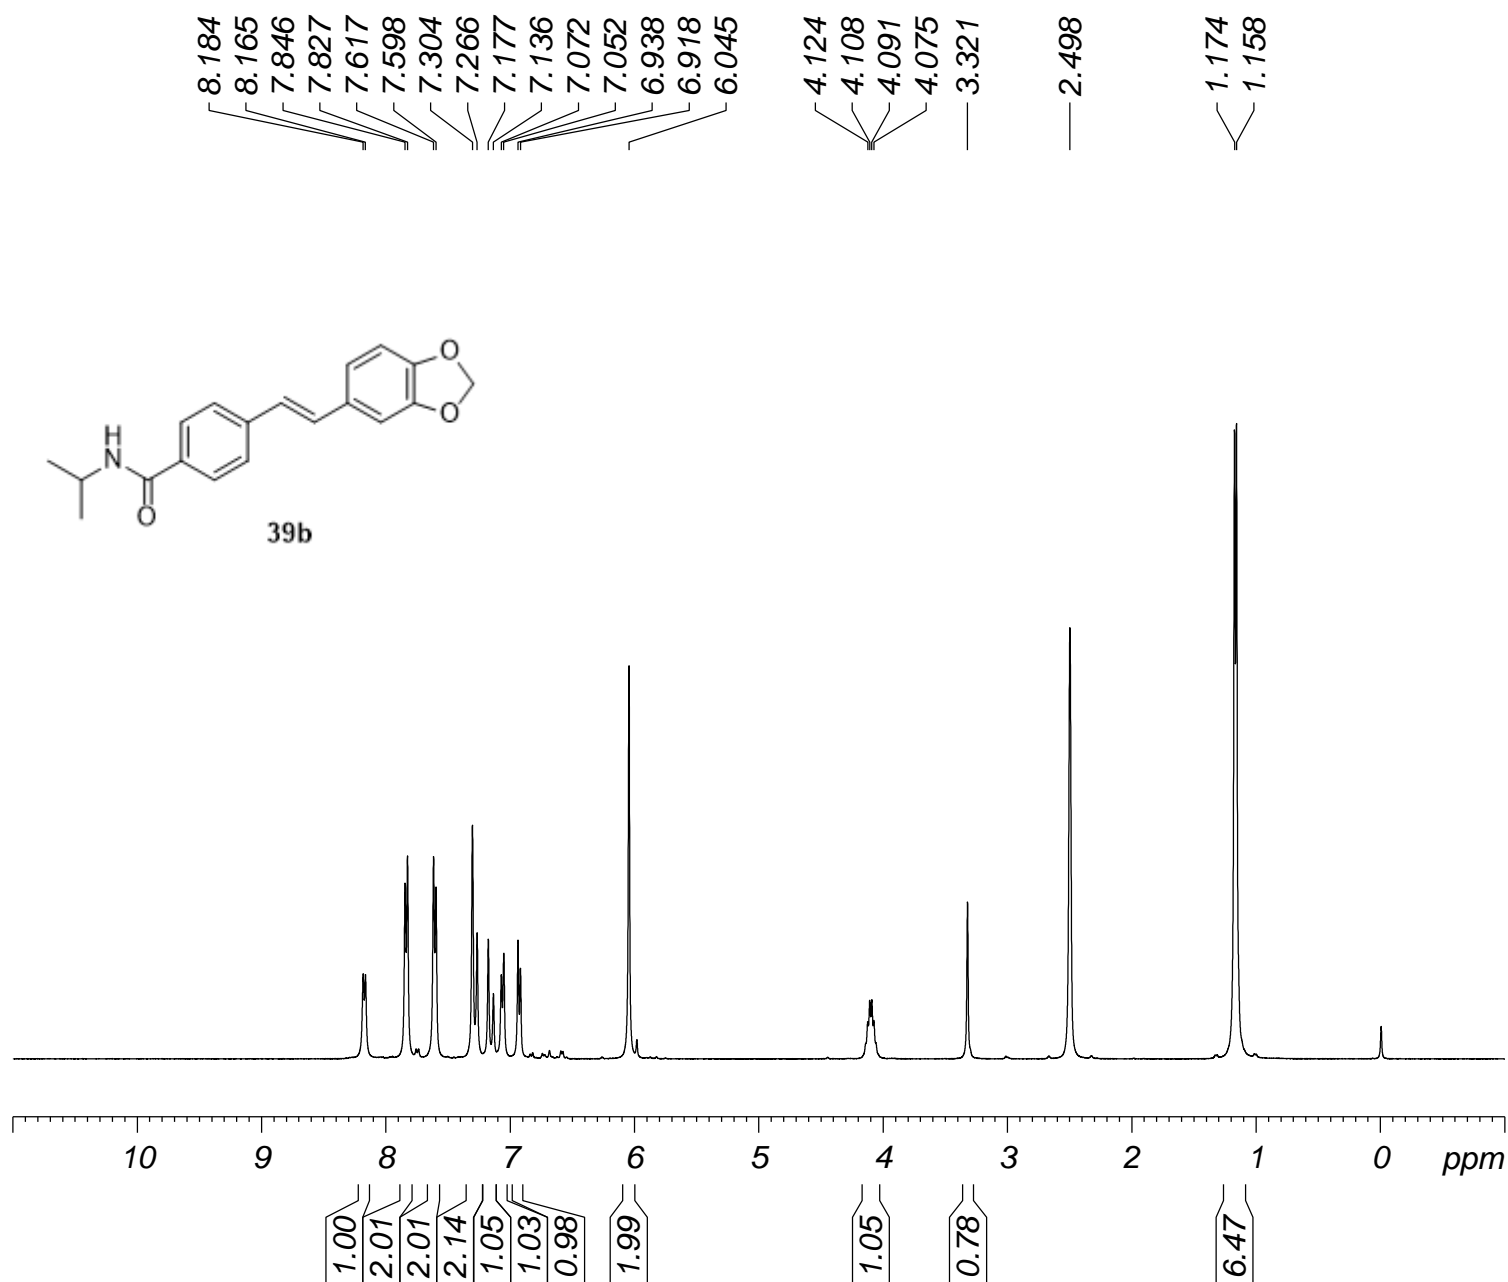

#### Current Data Parameters

NAME MCX-1-1201  
EXPNO 1  
PROCNO 1

#### F2 - Acquisition Parameters

Date\_ 20171201  
Time 11.12 h  
INSTRUM spect  
PROBHD Z116098\_0436 (  
PULPROG zg30  
TD 65536  
SOLVENT DMSO  
NS 16  
DS 2  
SWH 8012.820 Hz  
FIDRES 0.244532 Hz  
AQ 4.0894465 sec  
RG 98.25  
DW 62.400 usec  
DE 6.50 usec  
TE 298.0 K  
D1 1.00000000 sec  
TD0 1  
SFO1 400.1524709 MHz  
NUC1 1H  
P1 9.75 usec  
PLW1 15.00300026 W

#### F2 - Processing parameters

SI 65536  
SF 400.1500033 MHz  
WDW EM  
SSB 0  
LB 0.30 Hz  
GB 0  
PC 1.00

MCX-2

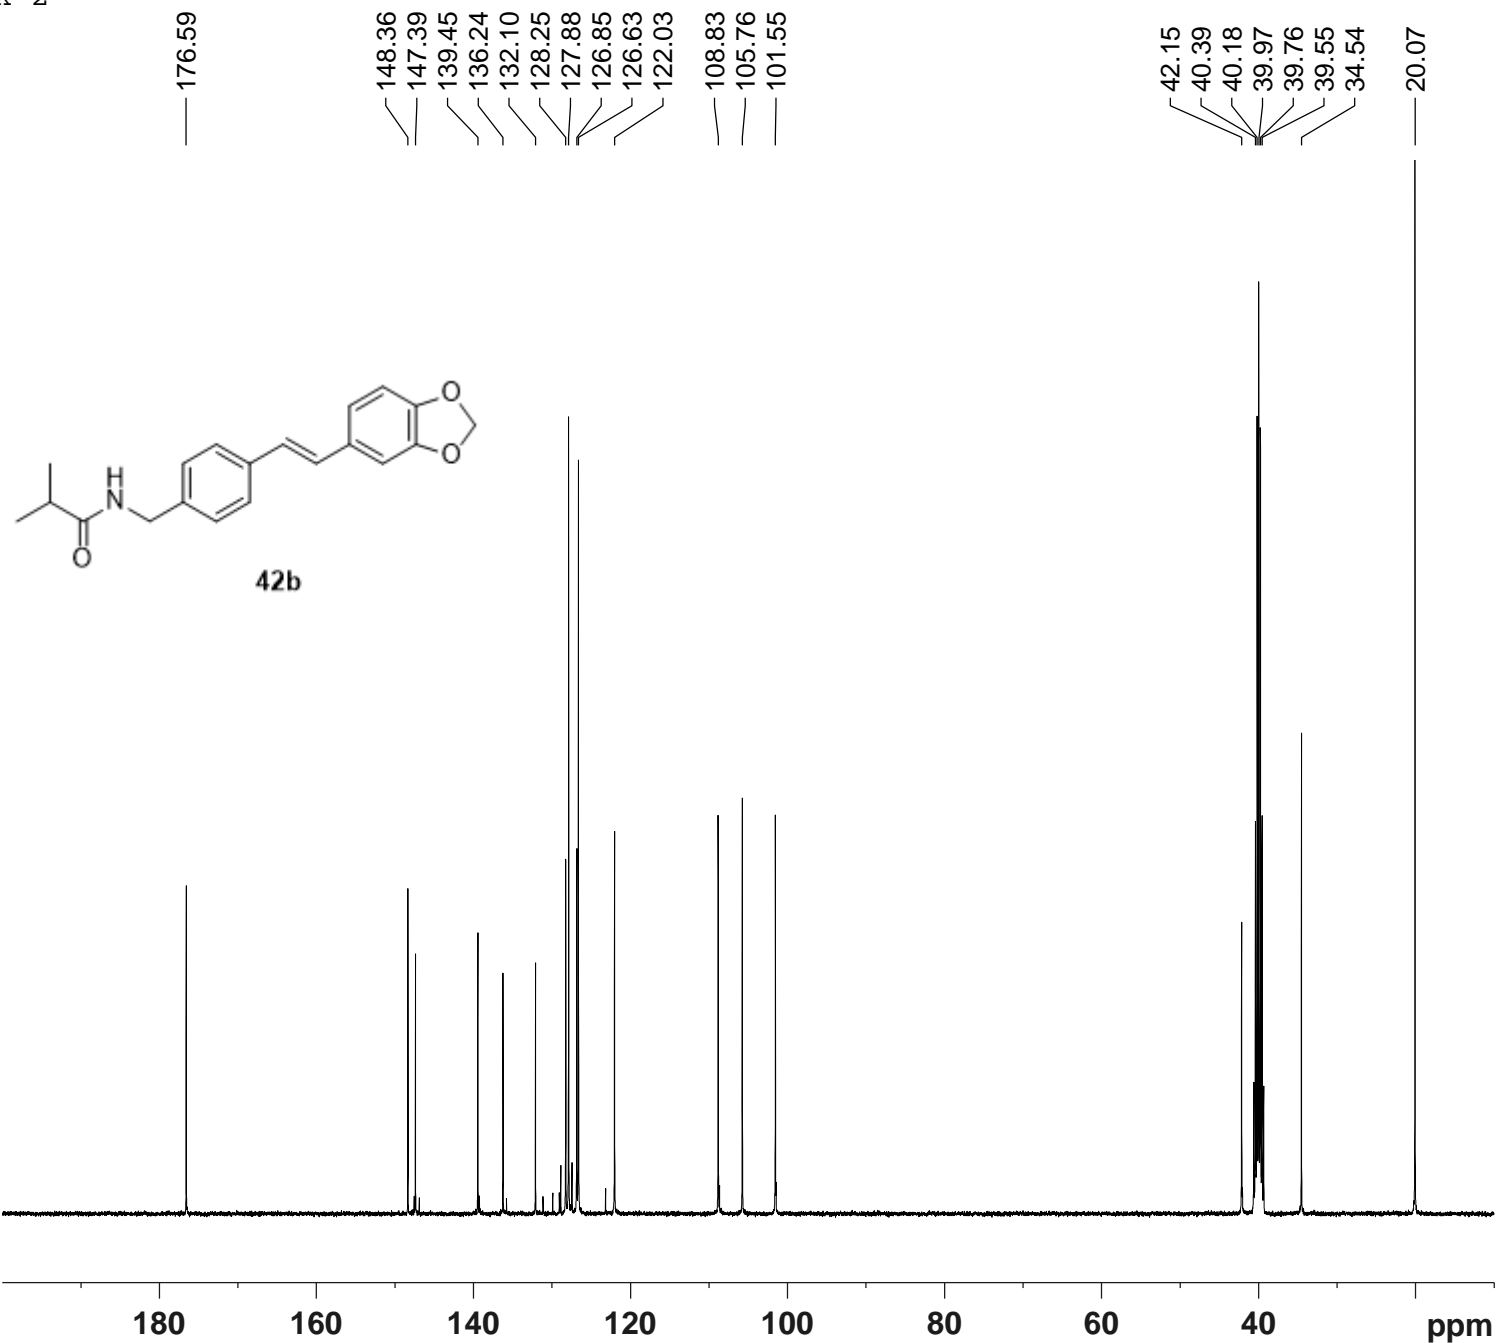

# Current Data Parameters

NAME MCX-2-C  
EXPNO 1  
PROCNO 1

## F2 - Acquisition Parameters

Date\_ 20161215  
Time 11.08 h  
INSTRUM spect  
PROBHD Z116098\_0436 (  
PULPROG zgpg30  
TD 65536  
SOLVENT DMSO  
NS 1024  
DS 4  
SWH 24038.461 Hz  
FIDRES 0.733596 Hz  
AQ 1.3631488 sec  
RG 202.1  
DW 20.800 usec  
DE 6.50 usec  
TE 298.0 K  
D1 2.00000000 sec  
D11 0.03000000 sec  
TD0 1  
SFO1 100.6278593 MHz  
NUC1 13C  
P1 10.00 usec  
PLW1 68.03199768 W  
SFO2 400.1516006 MHz  
NUC2 1H  
CPDPRG[2] waltz16  
PCPD2 80.00 usec  
PLW2 15.00300026 W  
PLW12 0.22284999 W  
PLW13 0.11191000 W

## F2 - Processing parameters

SI 32768  
SF 100.6177975 MHz  
WDW EM  
SSB 0  
LB 1.00 Hz  
GB 0  
PC 1.40

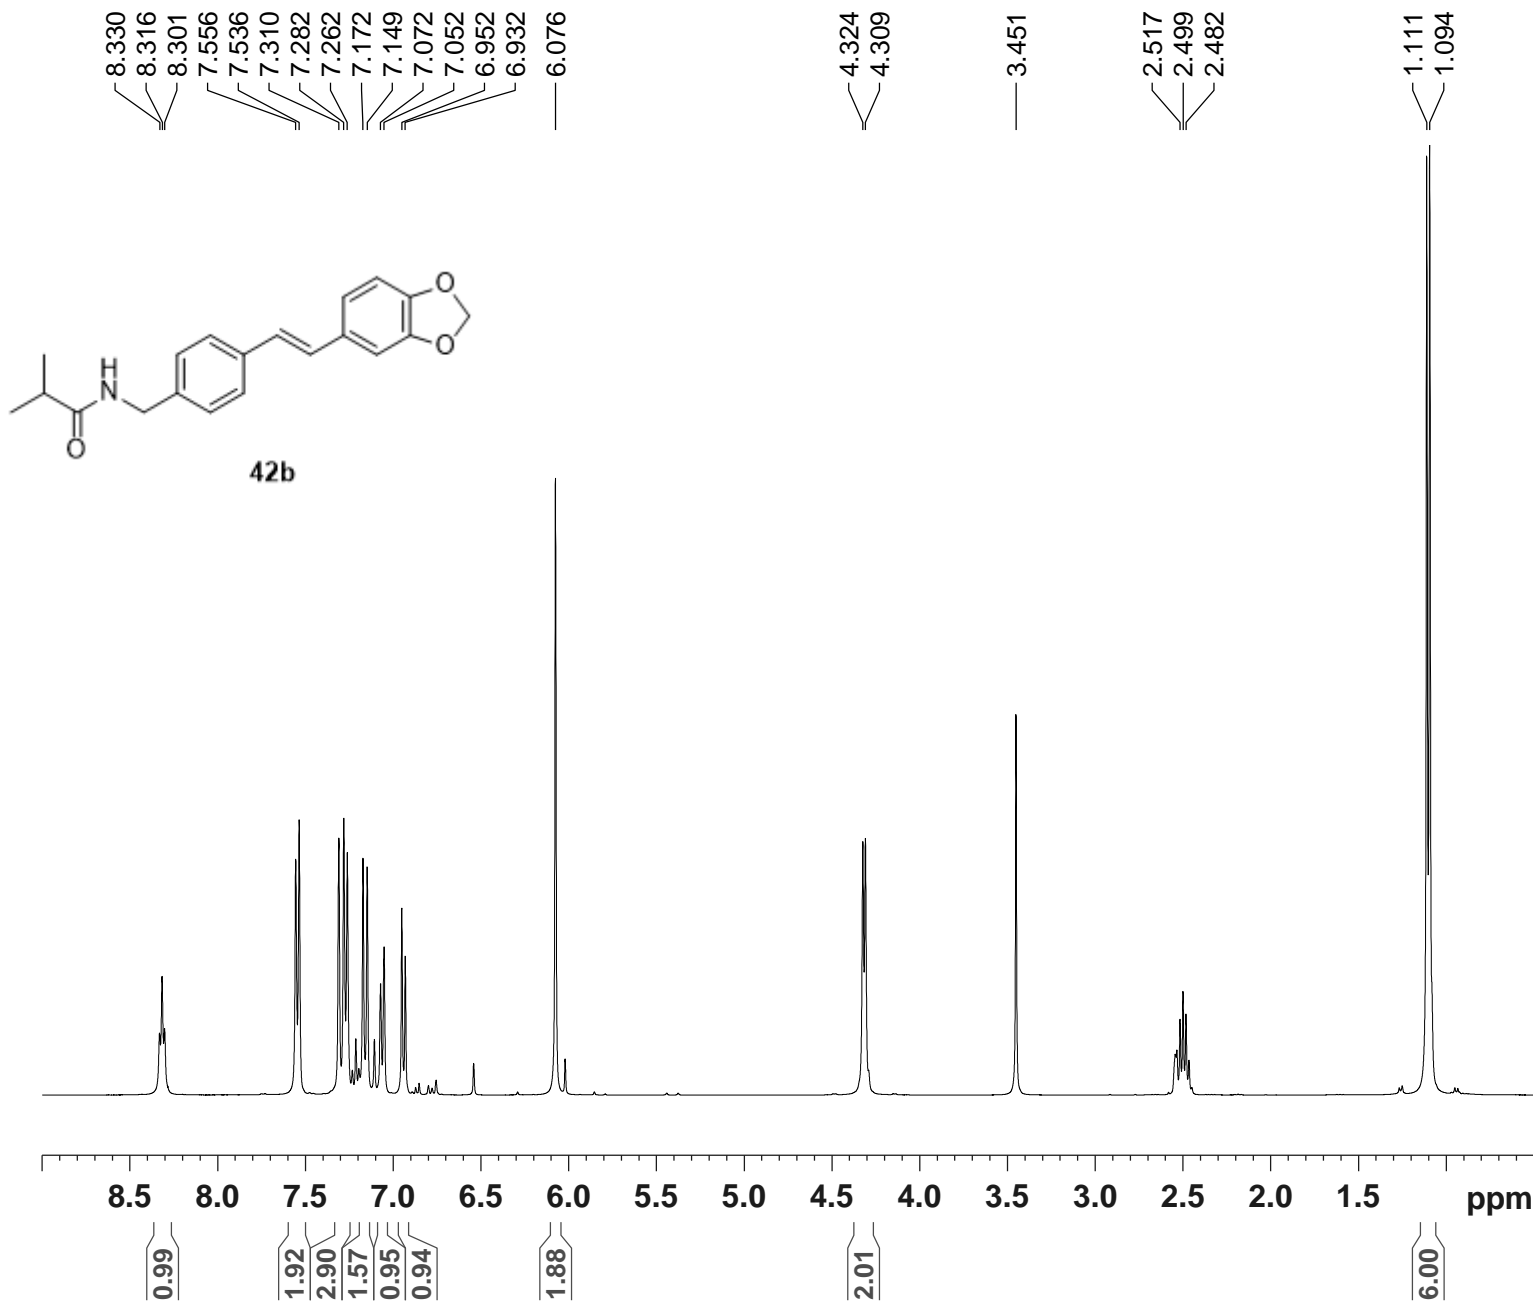

#### Current Data Parameters

NAME MCX-2  
EXPNO 1  
PROCNO 1

#### F2 - Acquisition Parameters

Date\_ 20161214  
Time 13.13 h  
INSTRUM spect  
PROBHD Z116098\_0436 (  
PULPROG zg30  
TD 65536  
SOLVENT DMSO  
NS 16  
DS 2  
SWH 8012.820 Hz  
FIDRES 0.244532 Hz  
AQ 4.0894465 sec  
RG 13.82  
DW 62.400 usec  
DE 6.50 usec  
TE 298.0 K  
D1 1.00000000 sec  
TD0 1  
SFO1 400.1524709 MHz  
NUC1 1H  
P1 9.75 usec  
PLW1 15.00300026 W

#### F2 - Processing parameters

SI 65536  
SF 400.1499852 MHz  
WDW EM  
SSB 0  
LB 0.30 Hz  
GB 0  
PC 1.00

## HRMS for the representative compounds.

8c

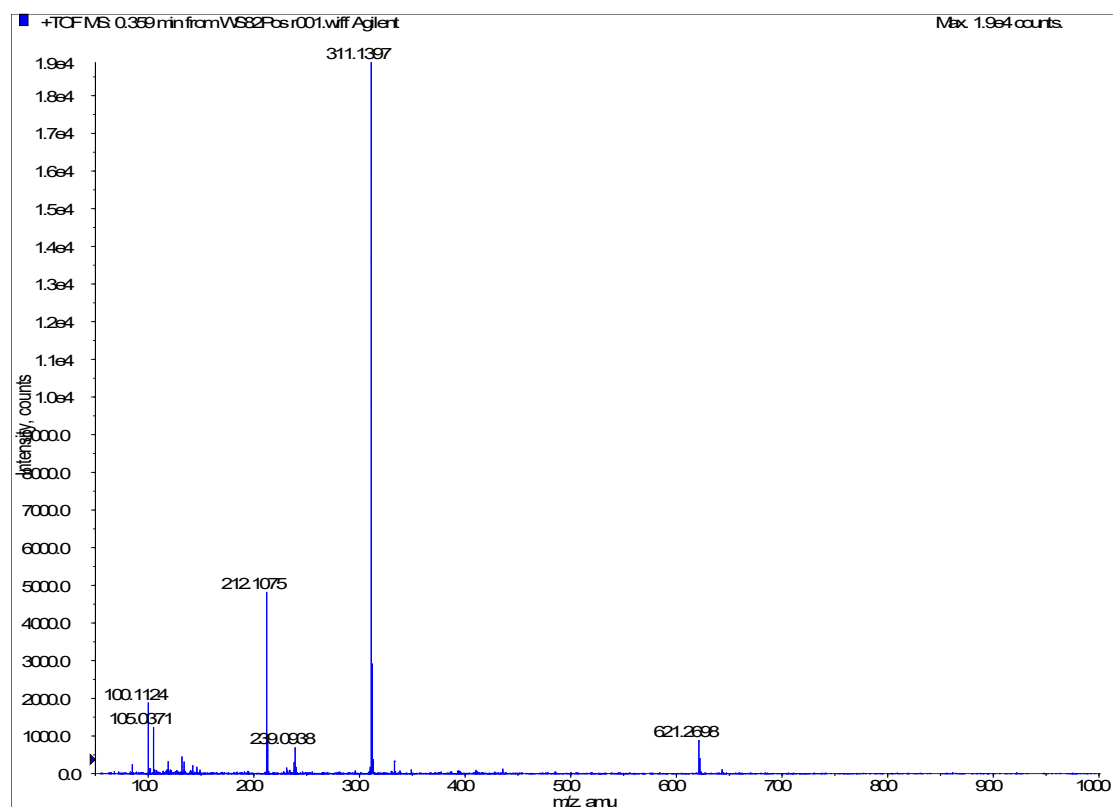

8d

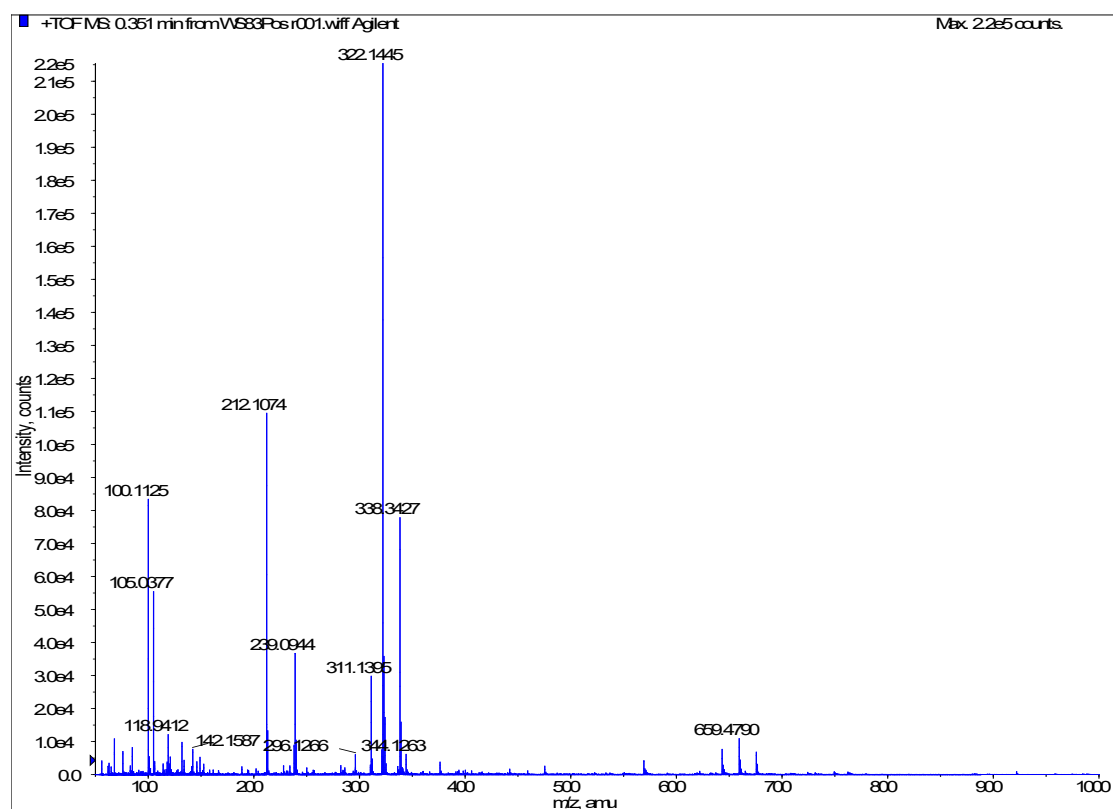

8e

## Peking University Mass Spectrometry Sample Analysis Report

## Analysis Info

Analysis Name FTMS-17010083\_Pos\_20170117\_000004.d  
Sample LSS-50  
Comment

Acquisition Date 1/17/2017 3:18:35 PM  
Instrument Bruker Solarix XR FTMS  
Operator Peking University

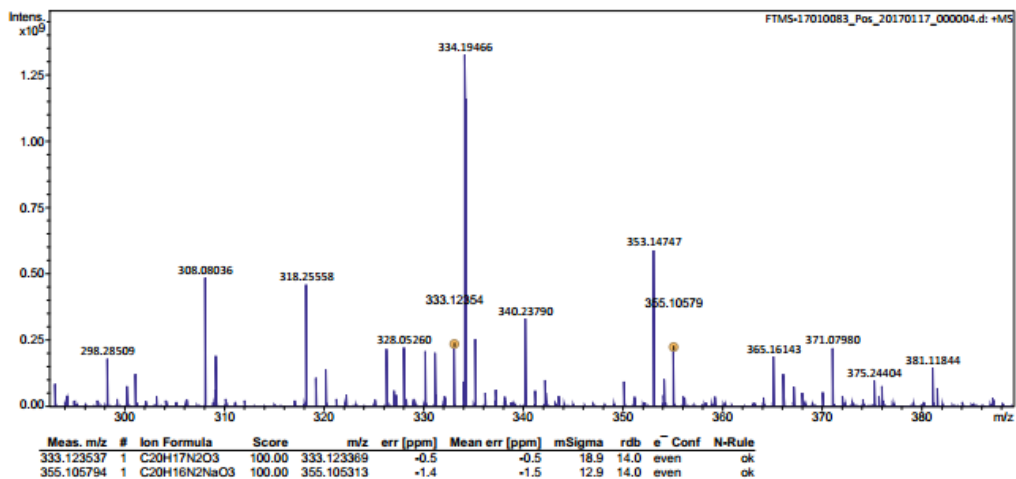

8g

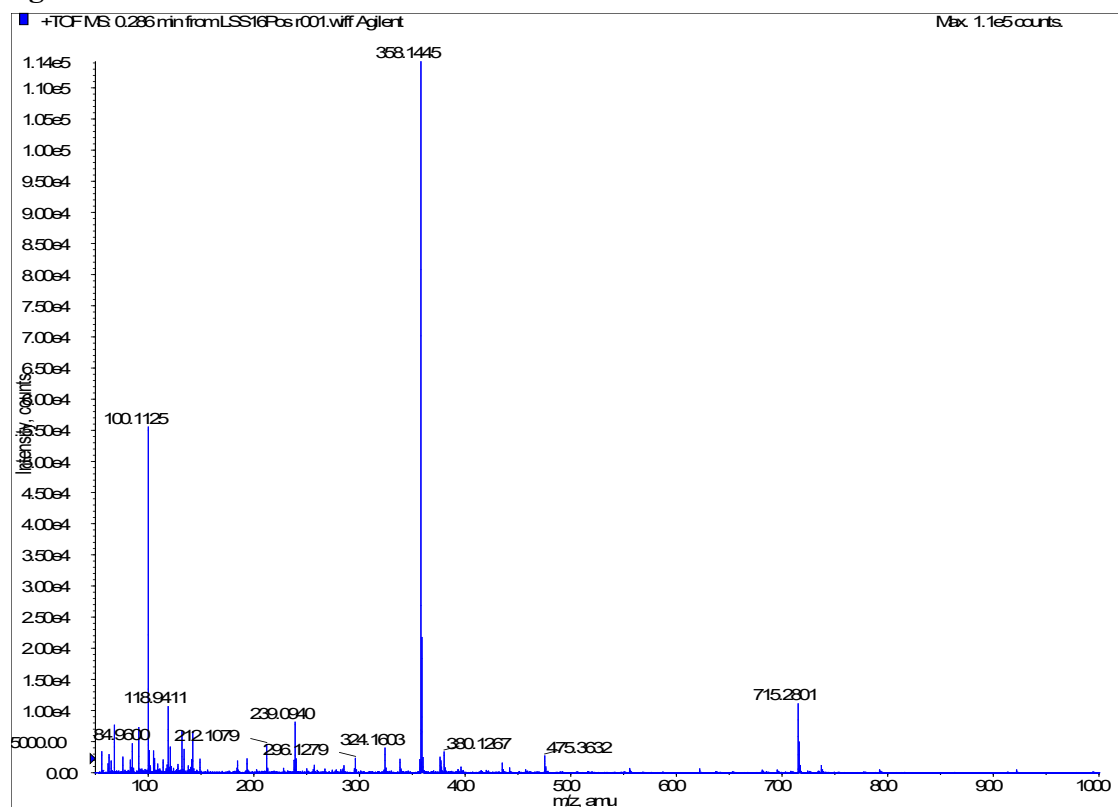

8h

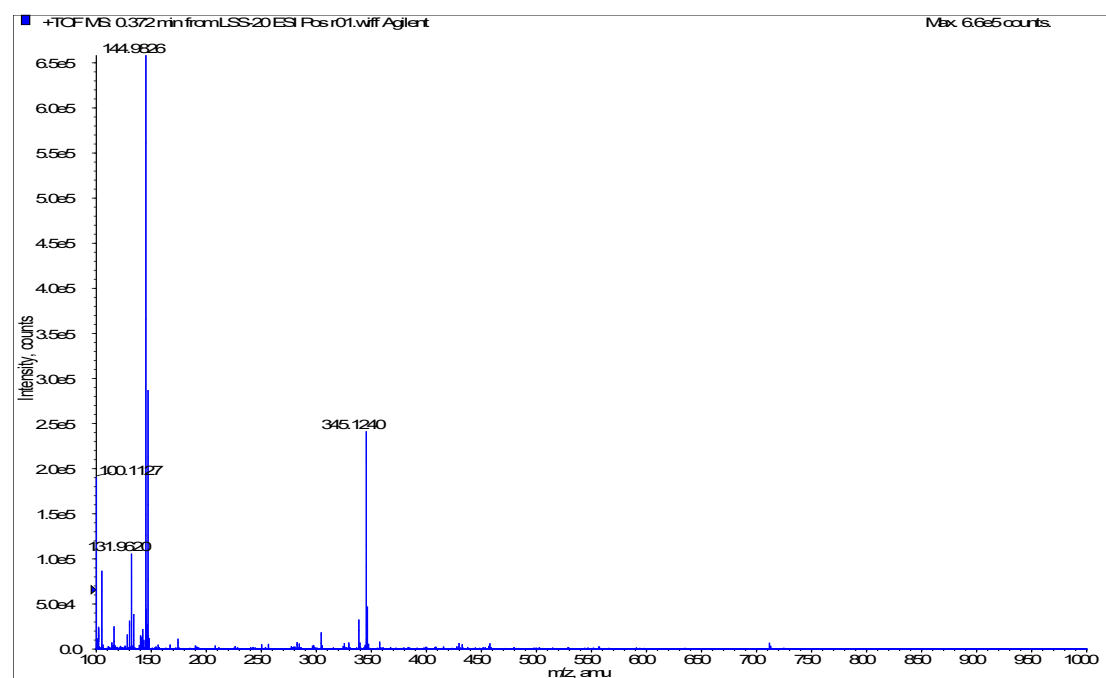

8j

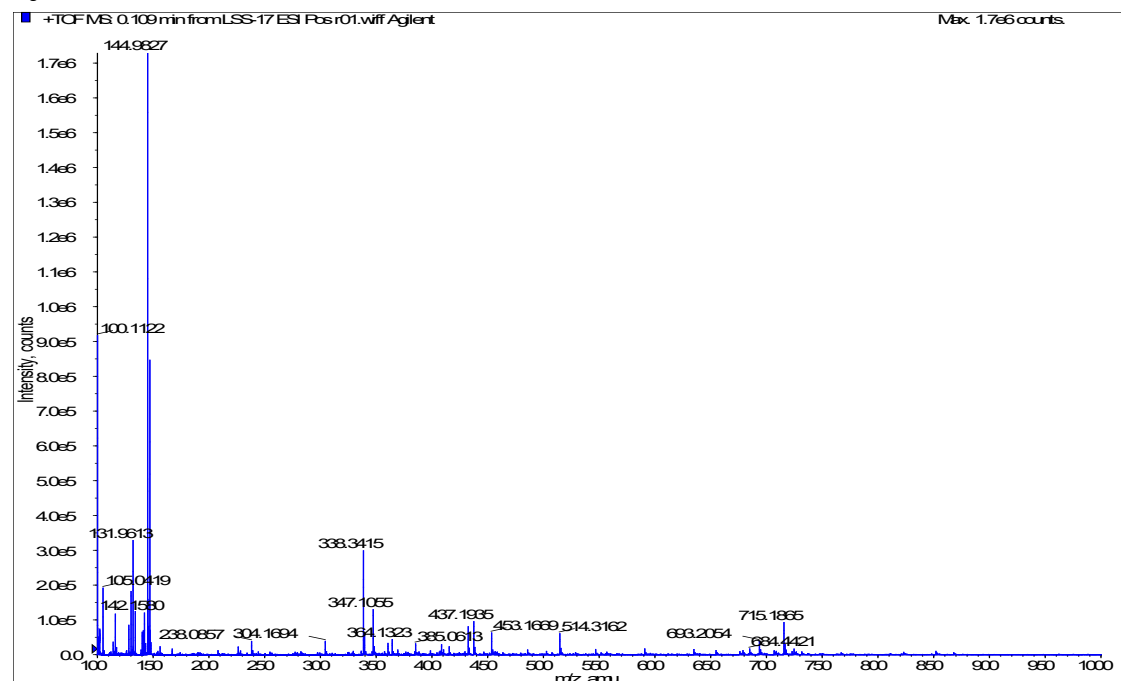

8k

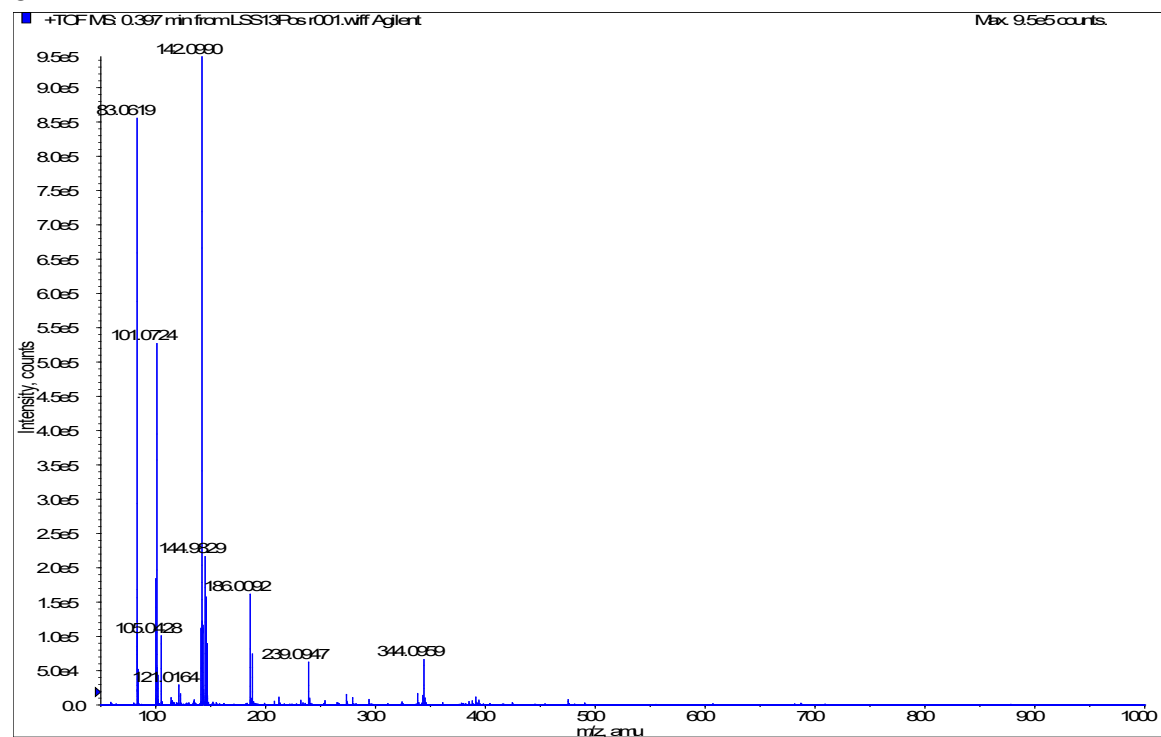

8l

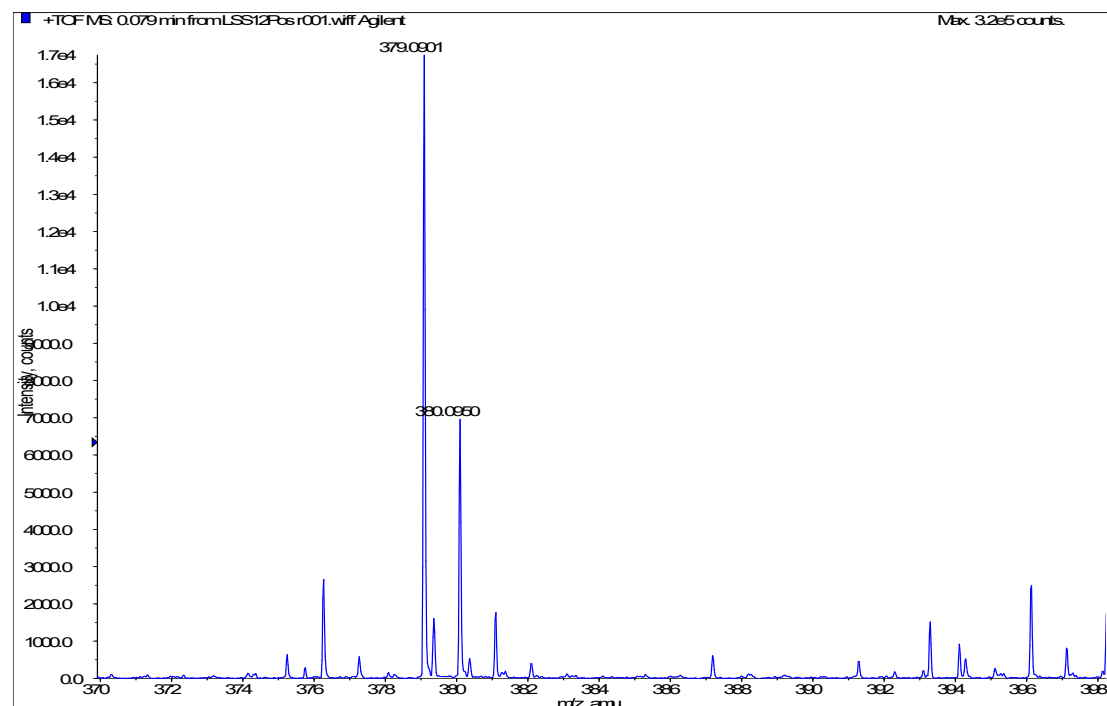



9b

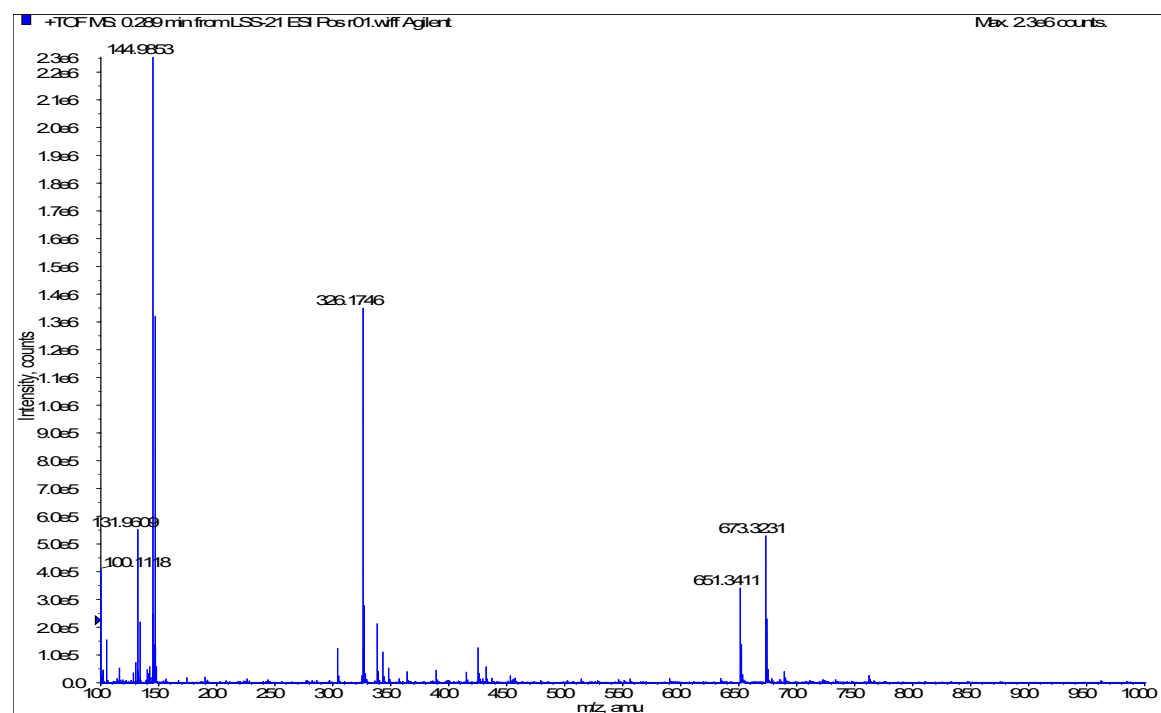

12f

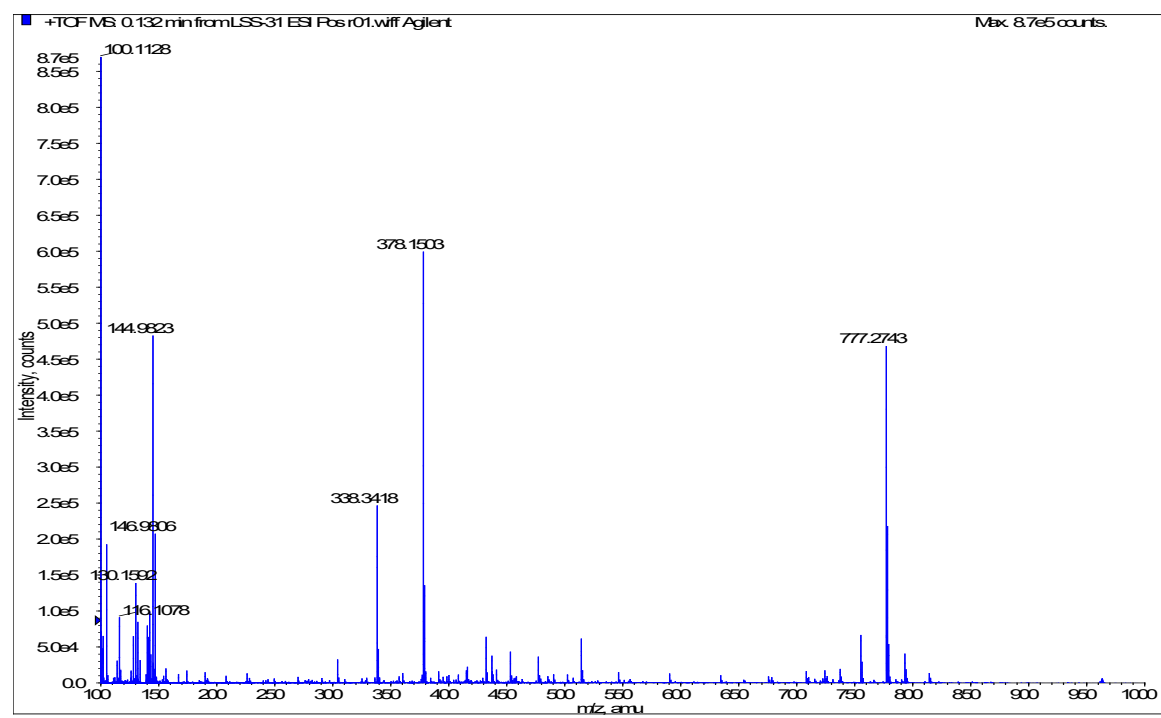

18b

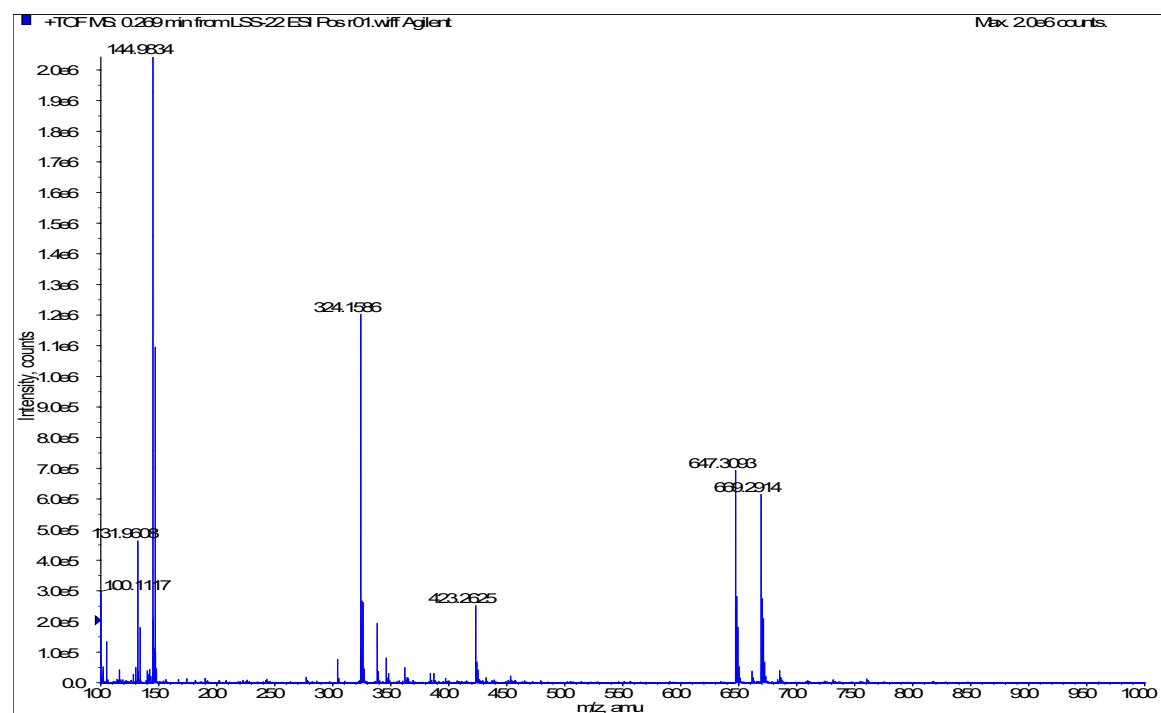

23b

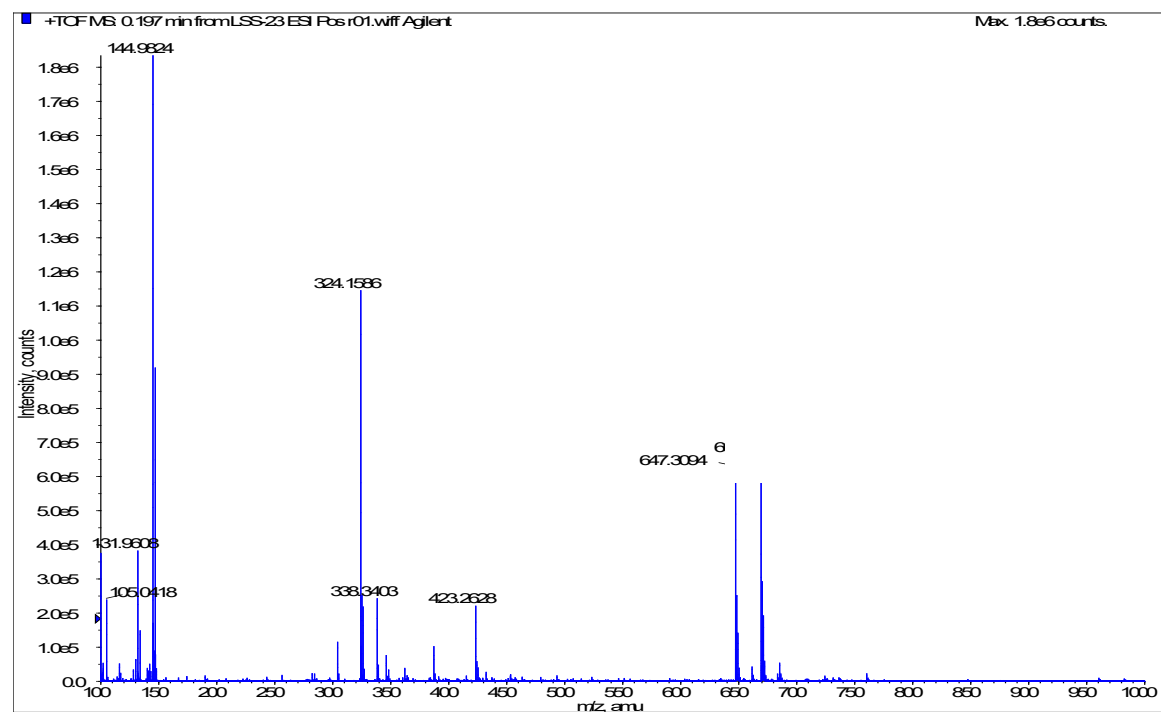

23i

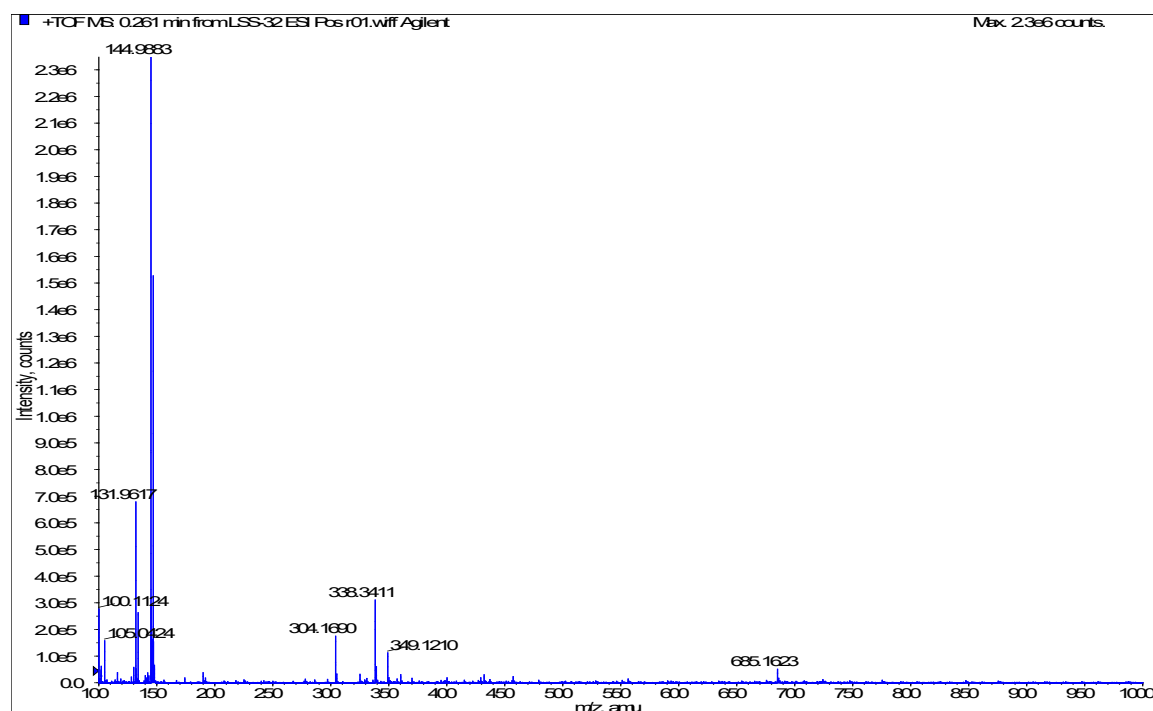

24b

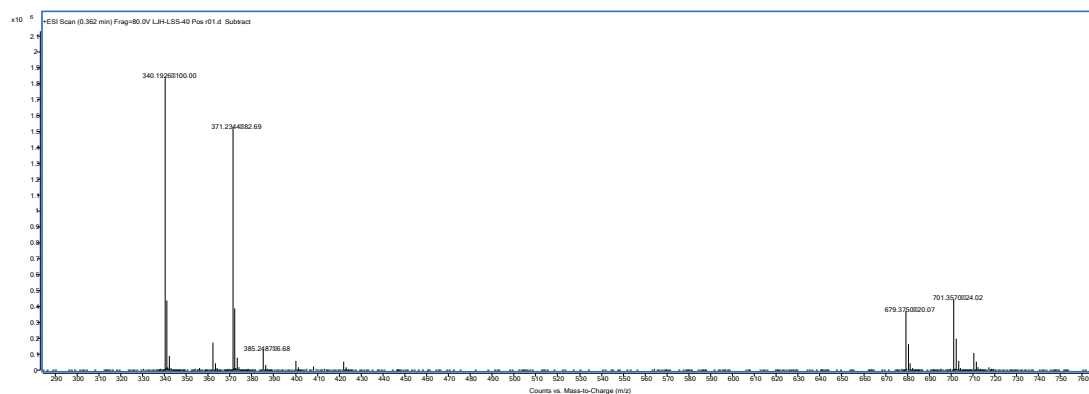

29a

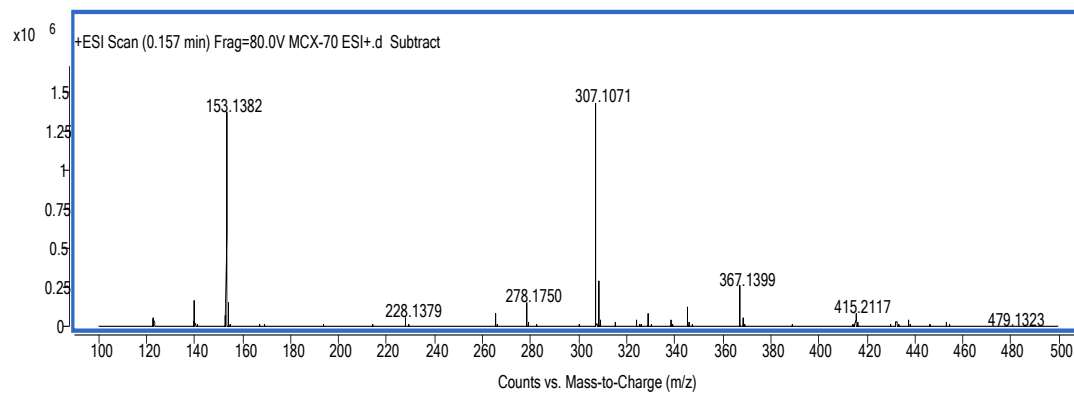

29b

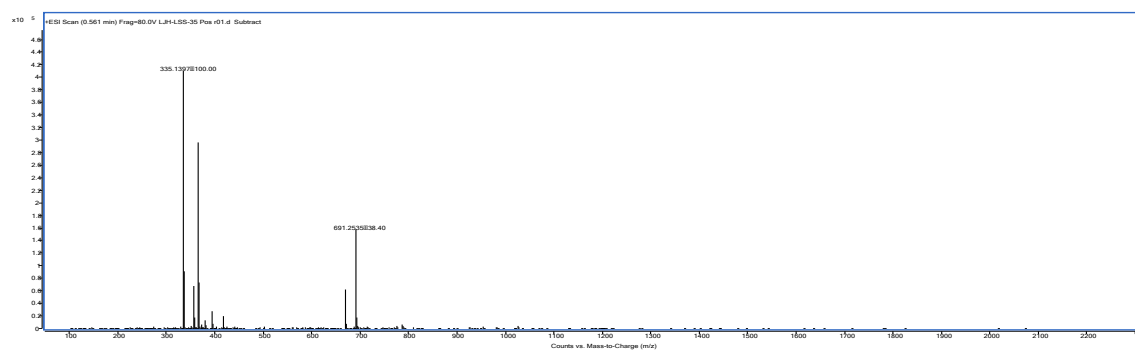

32a

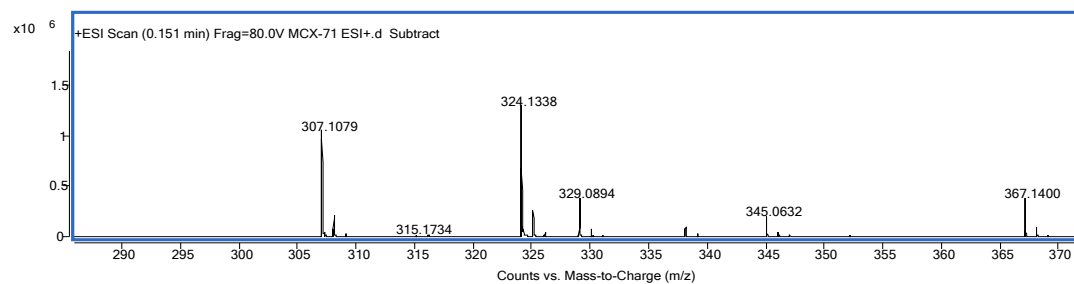

32b

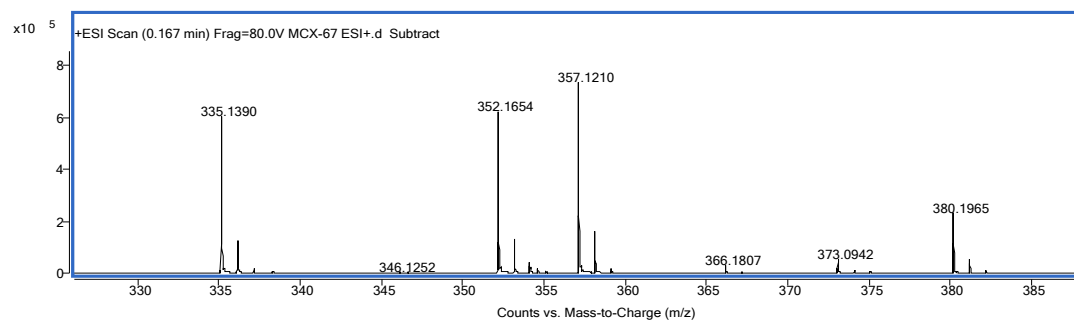

36a

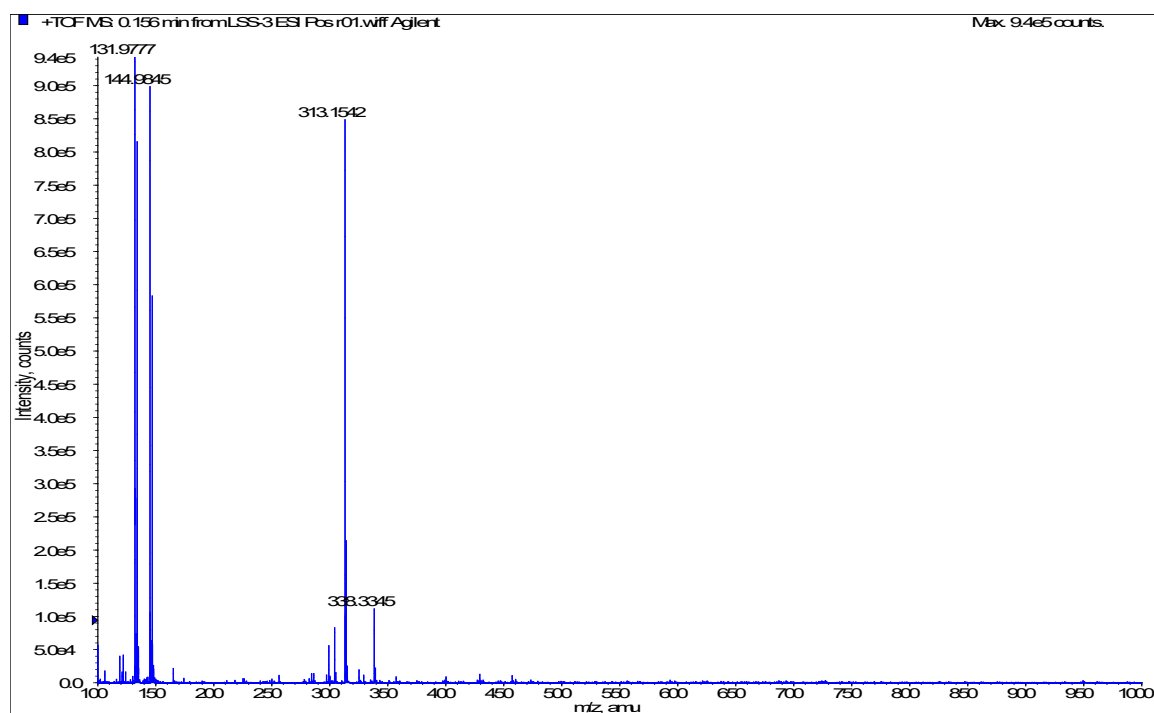

39b

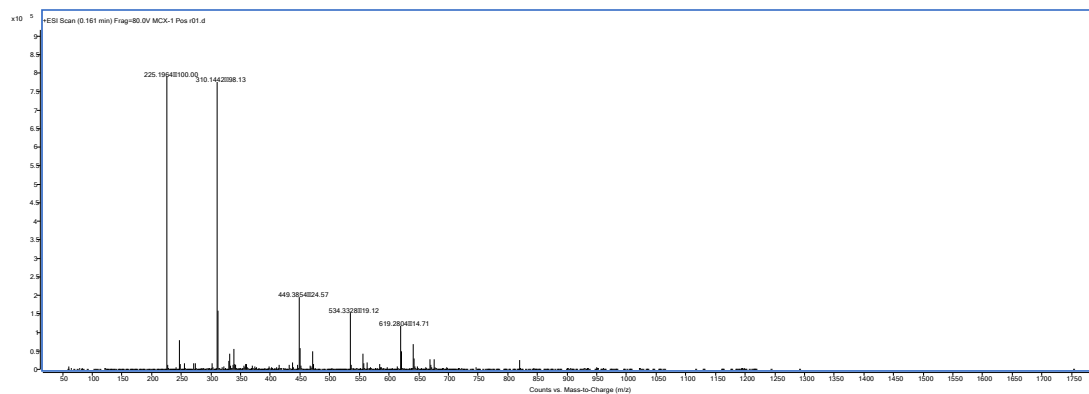

42b

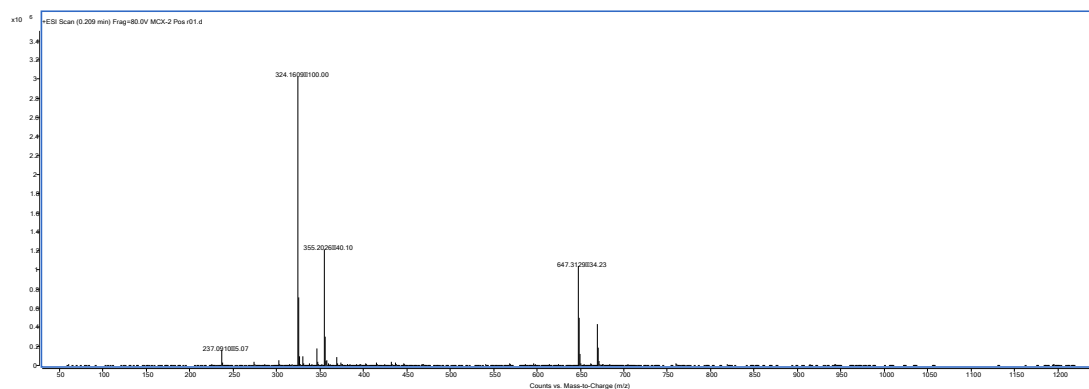

Pharmacokinetic experimental conditions of compound **32b**.

LC-MS method: It was performed on a Thermo Scientific Q Exactive HF-X instrument, the column was an ACQUITY UPLC BEH C18 Column, 130 Å, 1.7 µm, 2.1 mm×100 mm, and the pre-column was an ACQUITY UPLC BEH C18 VanGuard Pre- column, 130Å, 1.7 µm, 2.1 mm×5 mm, and the liquid-phase was based on gradient elution with acetonitrile and 0.1% aqueous formic acid, and the mass spectrometry was performed in positive ion mode. The drug concentration in plasma samples was quantified by internal standard method and the pharmacokinetic parameters were calculated by phoenix winnonlin.

Mass spectrometry conditions: **32b** mass spectrometry acquisition mode is positive ion mode, the molecular weight of the precursor ion is  $[M+H]^+$ : 335.1384, the molecular weight of the daughter ion is: 265.0969.

|                     |                                                        |
|---------------------|--------------------------------------------------------|
| Column Details:     | ACQUITY UPLC BEH C18 Column<br>(1.7 µm, 2.1 mm×100 mm) |
| Column Temperature: | 30°C                                                   |
| Flow Rate:          | 0.3 mL/min                                             |
| Injection volum:    | 3 µL                                                   |

Solvent A: 0.1% formic acid in water; Solvent B: acetonitrile.

| Time | Solvent A | Solvent B |
|------|-----------|-----------|
| 0    | 60        | 40        |
| 2    | 60        | 40        |
| 3    | 2         | 98        |
| 10   | 2         | 98        |
| 11   | 60        | 40        |
| 13   | 60        | 40        |

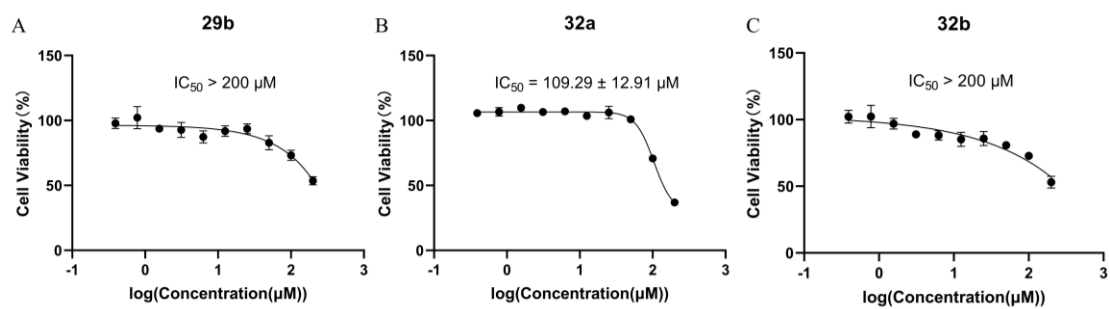

Figure S1. Results of dose-toxicity experiment for compounds **29b**, **32a**, and **32b**.
